# Supplementary material for: “Armed and disarmed” theory in the addition of an azide radical to glucals
Source: Royal Society of Chemistry journal article supplement (doi:10.1039/c5ra00296f), 2015-01-01

## “Armed and Disarmed” Theory in the Addition of Azide Radical to Glucals

---

**Wenjun Wang, Zhongyue Yang, Yun Xu, Taibao Liu, Tianbang Song, Yunyan Zhao, Xiufang  
Xu, Wei Zhao, Peng George Wang**

## Supporting Information

|                                                                                                                  |    |
|------------------------------------------------------------------------------------------------------------------|----|
| 1. General azidonitration procedure .....                                                                        | 2  |
| 2. Characterization of compounds in Table 1 .....                                                                | 2  |
| 3. Synthesis of S8.....                                                                                          | 3  |
| 4. Synthesis of S10.....                                                                                         | 4  |
| 5. Synthesis of trisaccharide 12.....                                                                            | 4  |
| 6. The conformational screen of compounds <b>5e</b> , <b>3b</b> , <b>5c</b> ,.....                               | 6  |
| 7. Electron density study of intermediates .....                                                                 | 9  |
| 8. The Cartesian coordinates (Å), SCF energies and Gibbs free energies at 298K for the optimized structures..... | 10 |
| 9. Spectrum of the compounds.....                                                                                | 34 |

### 1. General azidonitration procedure

Under Ar condition, CAN (3mmol, 3 equiv) was added in portion-wise to the mixture of NaN<sub>3</sub> (1.5mmol, 1.5equiv.) and glycan derivative (1mmol, 1equiv.) in 10 ml anhydrous MeCN at -30°C. The reaction was monitored by TLC. After the complete conversion of starting materials, EtOAc (30ml, 300% v/v) and water (20ml, 200% v/v) were added to the reaction suspension and the mixture was kept stirring until the solution turned into pale yellow. The separated organic layer was washed with brine, dried over Na<sub>2</sub>SO<sub>4</sub> and evaporated to dryness. The crude product was purified by silica gel chromatography immediately to afford the corresponding compound.

### 2. Characterization of compounds in Table 1

6a, 7a

<sup>1</sup>H NMR (400 MHz, CDCl<sub>3</sub>): δ 7.40 – 7.27 (m, 40H), 7.18 – 7.11 (m, 5H), 6.28 (d, *J* = 4.0 Hz, 1H), 6.17 (s, 2H), 4.88 (d, *J* = 2.6 Hz, 2H), 4.83 – 4.77 (m, 3H), 4.76 – 4.72 (m, 3H), 4.65 (d, *J* = 12.1 Hz, 2H), 4.60 (d, *J* = 12.0 Hz, 1H), 4.54 (d, *J* = 10.9 Hz, 1H), 4.51 – 4.45 (m, 5H), 4.03 (dd, *J* = 9.1 Hz, 2H), 3.96 – 3.90 (m, *J* = 6.7 Hz, 5H), 3.89 – 3.83 (m, *J* = 8.1 Hz, 4H), 3.81 – 3.72 (m, 5H), 3.67 – 3.61 (m, 3H).

<sup>13</sup>C NMR (100 MHz, CDCl<sub>3</sub>): δ 137.92, 137.86, 137.68, 137.60, 137.44, 137.34, 128.71, 128.60, 128.54, 128.51, 128.47, 128.27, 128.17, 128.15, 128.03, 127.97, 127.93, 127.80, 127.72, 98.32, 97.57, 80.33, 79.15, 77.29, 75.80, 75.25, 75.20, 74.57, 73.82, 73.64, 73.60, 73.50, 73.20, 67.98, 67.59, 61.71, 58.85.

HRMS C<sub>27</sub>H<sub>28</sub>N<sub>4</sub>NaO<sub>7</sub> [M+Na<sup>+</sup>] = 543.1858 (543.1856)

6b, 7b

<sup>1</sup>H NMR (400 MHz, CDCl<sub>3</sub>) (mannose configuration): δ 7.67 – 7.59 (m, 4H), 7.47 – 7.34 (m, 6H), 6.22 (d, *J* = 2.0 Hz, 1H), 5.47 (dd, *J* = 9.7 Hz, 1H), 5.24 (dd, *J* = 9.4, 3.8 Hz, 1H), 4.17 (dd, *J* = 3.7, 2.1 Hz, 1H), 3.91 (ddd, *J* = 10.1, 4.4, 2.6 Hz, 1H), 3.76 – 3.65 (m, 2H), 2.11 (s, 3H), 1.93 (s, 3H), 1.05 (s, 9H).

<sup>13</sup>C NMR (100 MHz, CDCl<sub>3</sub>): δ 169.93, 169.14, 135.70, 135.63, 133.02, 132.91, 129.88, 129.80, 127.73, 127.71, 97.92, 97.51, 73.93, 73.38, 70.70, 65.24, 62.07, 60.61, 58.80, 26.65, 26.61, 20.55, 20.50, 19.19.

HRMS C<sub>26</sub>H<sub>32</sub>N<sub>4</sub>NaO<sub>9</sub>Si [M+Na<sup>+</sup>] = 595.1835 (595.1836)

6c, 7c

<sup>1</sup>H NMR (400 MHz, CDCl<sub>3</sub>): δ 7.71 – 7.64 (m, 4H), 7.43 – 7.27 (m, 14H), 7.20 – 7.14 (m, 2H), 6.17 (d, *J* = 1.1 Hz, 1H), 4.87 (d, *J* = 10.8 Hz, 1H), 4.80 – 4.70 (m, 2H), 4.62 (d, *J* = 10.8 Hz, 1H), 4.13 (dd, *J* = 9.6, 8.4 Hz, 1H), 3.98 – 3.91 (m, 3H), 3.83 (dd, *J* = 11.5, 1.6 Hz, 1H), 3.79 – 3.74 (m, 1H), 1.06 (s, 10H).

<sup>13</sup>C NMR (100 MHz, CDCl<sub>3</sub>): δ 137.88, 137.33, 135.89, 135.62, 133.51, 132.94, 129.72, 128.69, 128.48, 128.25, 128.05, 127.89, 127.75, 127.64, 98.51, 79.09, 75.53, 75.28, 73.36, 73.22, 62.13, 58.87, 26.75.

HRMS C<sub>36</sub>H<sub>40</sub>N<sub>4</sub>NaO<sub>7</sub>Si [M+Na<sup>+</sup>] = 691.2564 (691.2564)

6d

<sup>1</sup>H NMR (400 MHz, CDCl<sub>3</sub>): δ 7.79 – 7.73 (m, 4H), 7.64 (d, *J* = 6.2 Hz, 4H), 7.52 – 7.37 (m,

12H), 6.27 (d,  $J = 2.6$  Hz, 1H), 5.39 (dd,  $J = 8.1, 3.8$  Hz, 1H), 5.12 (dd,  $J = 9.4$  Hz, 1H), 5.01 – 4.90 (m, 2H), 4.83 (d,  $J = 8.1$  Hz, 1H), 4.44 (t,  $J = 8.9$  Hz, 1H), 4.13 – 4.09 (m, 1H), 3.97 (dd,  $J = 11.9, 2.2$  Hz, 1H), 3.88 – 3.82 (m, 1H), 3.80 – 3.68 (m, 3H), 3.53 (ddd,  $J = 9.6, 5.2, 2.5$  Hz, 1H), 2.09 (s, 3H), 2.00 (s, 3H), 1.79 (s, 3H), 1.78 (s, 3H), 1.11 (s, 9H), 1.10 (s, 9H).

$^{13}\text{C}$  NMR (100 MHz,  $\text{CDCl}_3$ ):  $\delta$  170.26, 169.88, 169.32, 168.86, 135.97, 135.59, 135.55, 135.46, 133.21, 132.96, 132.93, 132.03, 130.05, 129.99, 129.88, 128.05, 127.80, 127.77, 127.74, 100.80, 98.26, 75.29, 74.46, 73.43, 72.76, 71.64, 70.10, 68.66, 63.09, 60.94, 58.92, 20.61, 20.58, 20.46, 20.39, 19.34, 19.10.

HRMS  $\text{C}_{52}\text{H}_{64}\text{N}_4\text{O}_{16}\text{Si}_2$  [ $\text{M}+\text{NH}_4^+$ ] = 1074.4188(1074.4200)

6e

$^1\text{H}$  NMR (400 MHz,  $\text{CDCl}_3$ ):  $\delta$  6.22 (d,  $J = 1.5$  Hz, 1H), 5.40 (dd,  $J = 9.8$  Hz, 1H), 5.31 (dd,  $J = 9.8, 3.8$  Hz, 1H), 4.22 (dd,  $J = 3.7, 1.9$  Hz, 1H), 3.92 – 3.87 (m, 1H), 3.73 (dd,  $J = 13.1, 2.1$  Hz, 1H), 3.61 (dd,  $J = 13.0, 3.7$  Hz, 1H), 2.14 (s, 3H), 2.10 (s, 3H).

$^{13}\text{C}$  NMR (100 MHz,  $\text{CDCl}_3$ ):  $\delta$  170.34, 169.86, 97.22, 73.39, 70.20, 65.18, 60.67, 58.83, 20.63, 20.43.

HRMS  $\text{C}_{10}\text{H}_{15}\text{N}_4\text{O}_9$  [ $\text{M}+\text{H}^+$ ] = 335.0840 (335.0839)

6f, 7f

$^1\text{H}$  NMR (400 MHz,  $\text{CDCl}_3$ ):  $\delta$  6.16 (d,  $J = 3.4$  Hz, 1H), 5.61 (d,  $J = 8.8$  Hz, 2H), 5.42 (dd,  $J = 7.1, 3.5$  Hz, 1H), 5.27 (dd,  $J = 9.5$  Hz, 4H), 5.15 (dd,  $J = 9.7$  Hz, 2H), 5.00 (dd,  $J = 9.7, 3.4$  Hz, 2H), 4.91 (dd,  $J = 9.3, 8.1$  Hz, 2H), 4.73 (dd,  $J = 4.0$  Hz, 2H), 4.33 (dd,  $J = 6.7$  Hz, 1H), 4.27 – 4.19 (m, 2H), 4.16 – 4.12 (m, 3H), 4.03 (dd,  $J = 9.6$  Hz, 3H), 3.97 (dd,  $J = 12.5, 1.4$  Hz, 2H), 3.87 (dd,  $J = 12.4, 1.9$  Hz, 1H), 3.81 (dd,  $J = 12.8, 2.4$  Hz, 3H), 3.77 (dd,  $J = 4.6, 2.1$  Hz, 2H), 3.75 – 3.73 (m, 1H), 3.69 – 3.65 (m, 2H), 3.62 – 3.60 (m, 2H), 3.59 – 3.57 (m, 2H), 3.55 – 3.51 (m, 2H), 2.27 – 2.21 (m, 9H), 2.11 – 2.08 (m, 9H), 2.08 – 2.06 (m,  $J = 4.2$  Hz, 9H), 2.03 – 2.02 (m, 9H).

$^{13}\text{C}$  NMR (100 MHz,  $\text{CDCl}_3$ ):  $\delta$  170.52, 170.42, 170.25, 170.23, 170.17, 170.13, 169.32, 169.19, 100.89, 100.07, 97.89, 76.10, 74.47, 74.31, 74.02, 73.59, 72.79, 72.75, 72.62, 72.50, 71.89, 71.72, 68.62, 68.59, 61.18, 60.69, 60.44, 59.49, 20.74, 20.59, 20.55.

HRMS  $\text{C}_{20}\text{H}_{28}\text{N}_4 \text{Na O}_{16}$  [ $\text{M}+\text{Na}^+$ ] = 603.1400 (603.1398)

### 3. Synthesis of S8

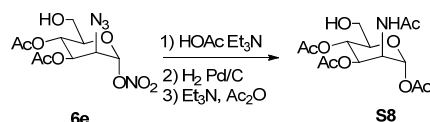

A solution of the **6e** (334 mg, 1 mmol, 1eq) and Et<sub>3</sub>N (0.5 mL, 5 mmol, 5eq) in 5 mL glacial acid was heated to 100°C for 25 min. The reaction was monitored by TLC. After the complete conversion of starting materials, the solution was diluted with dichloromethane and washed with water. After dryness over anhydrous sodium sulfate, evaporation of solvent gave syrup. Ac<sub>2</sub>O (0.1 mL, 1 mmol, 1eq), Et<sub>3</sub>N (0.1 mL, 1 mmol, 1eq) and the syrup was dissolved in EtOAc (5 mL). Pd/C (10%, 30 mg) was added to this solution under N<sub>2</sub>. The suspension was degassed under vacuum and purged with H<sub>2</sub> three times. The mixture was stirred under H<sub>2</sub> (1 atm) at 25°C for 1.5 h. The mixture was filtered through a pad of Celite and the pad was washed with EtOAc. After purification by column chromatography, the title compound was obtained as white foam **S8** (250

mg, 75%).

$^1\text{H}$  NMR (400 MHz,  $\text{CDCl}_3$ ):  $\delta$  6.32 (d,  $J = 9.2$  Hz, 1H), 6.03 (d,  $J = 1.5$  Hz, 1H), 5.38 (dd,  $J = 10.3, 4.5$  Hz, 1H), 5.20 (dd,  $J = 10.2$  Hz, 1H), 4.66 (ddd,  $J = 9.3, 4.5, 1.7$  Hz, 1H), 3.86 – 3.79 (m, 1H), 3.73 (dd,  $J = 12.9, 2.0$  Hz, 1H), 3.59 (dd,  $J = 12.9, 3.3$  Hz, 1H), 2.17 (s, 3H), 2.10 (s, 3H), 2.04 (s, 3H), 2.02 (s, 3H).

$^{13}\text{C}$  NMR (101 MHz,  $\text{CDCl}_3$ ):  $\delta$  170.71, 170.57, 170.15, 168.57, 92.02, 72.39, 68.78, 65.60, 60.61, 49.23, 22.93, 20.86, 20.73, 20.69.

In accord with the literature U. Aich, C. T. Campbell, N. Elmouelhi, C. A. Weier, S. G. Sampathkumar, S. S. Choi and K. J. Yarema, *ACS Chem Bio*, 2008, 3, 230.

#### 4. Synthesis of S10

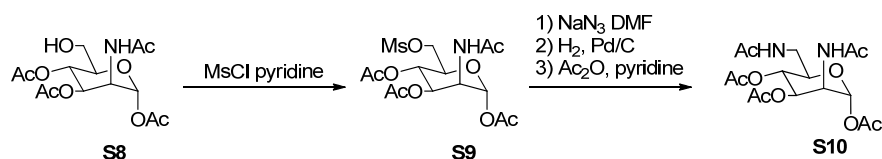

Flasks were heated before use under vacuum for 30 minutes and purged with  $\text{N}_2$  for 10 minutes. To a solution of compound **S8** (347 mg, 1 mmol) and pyridine (155  $\mu\text{L}$ , 2equiv) in DCM (anhydrous, 5 mL) was added drop-wise methanesulfonyl chloride (155  $\mu\text{L}$ , 2equiv) with stirring under ice-bath. After stirring for 8 h, the solution was poured into ice water. The aqueous layer was extracted with DCM (40 mL $\times$ 2). The combined organic layer was washed with brine and dried over  $\text{Na}_2\text{SO}_4$ . The crude product **S9** was dissolved in DMF (5 mL) and treated by sodium azide (650 mg 10equiv). The reaction mixture was stirring for 10h at 60°C. After removal of solvent by evaporation, extraction and purification by column chromatograph, the product was dissolved in EtOH (10 mL) and Pd/C (10%, 50 mg) was added to this solution under  $\text{N}_2$ . The suspension was degassed under vacuum and purged with  $\text{H}_2$  three times. The mixture was stirred under  $\text{H}_2$  (1 atm) at 25°C for 1.5 h. The suspension was filtered through a pad of Celite and the pad was washed with EtOH. The combined filtrates were concentrated to dryness, followed by acetylation using  $\text{Ac}_2\text{O}$  and pyridine. After purification by column chromatograph, the title compound **S10** was obtained as a white powder (55% yield, 213 mg).

$^1\text{H}$  NMR (400 MHz, MeOD):  $\delta$  5.96 (d,  $J = 1.1$  Hz, 1H), 5.27 (dd,  $J = 10.2, 4.4$  Hz, 1H), 5.19 (dd,  $J = 10.0$  Hz, 1H), 4.60 (dd,  $J = 4.2, 1.3$  Hz, 1H), 4.01 (ddd,  $J = 9.6, 6.9, 2.7$  Hz, 1H), 3.46 (dd,  $J = 14.2, 6.8$  Hz, 1H), 3.37 (dd,  $J = 14.5, 2.7$  Hz, 1H), 2.18 (s, 3H), 2.09 (s, 3H), 2.07 (s, 3H), 1.99 (s, 3H), 1.97 (s, 3H).

$^{13}\text{C}$  NMR (100 MHz, MeOD):  $\delta$  173.74, 173.54, 171.65, 171.53, 170.15, 93.39, 72.31, 70.69, 67.79, 50.69, 40.86, 22.50, 22.38, 20.66.

HRMS  $\text{C}_{16}\text{H}_{24}\text{N}_2 \text{Na O}_9$  [ $\text{M}+\text{Na}^+$ ]=411.1380 (411.1380)

#### 5. Synthesis of trisaccharide 12

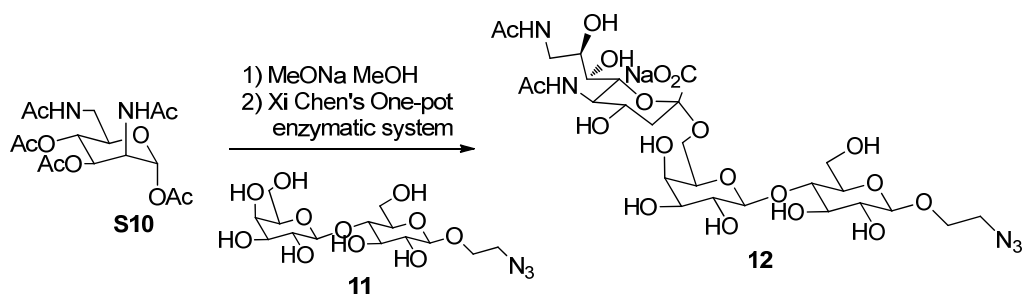

Compound **S10** (0.74mmol, 287mmol, 1 eq) was treated with MeONa/MeOH (pH=9.0, 5 ml). After 30min, the reaction was quenched by H<sup>+</sup> resin and filtered. The solution was concentrated under vacuum. According to the protocol reported in the literature<sup>2</sup>, the crude product was added to a solution of 25 ml Tris-HCl buffer solution (10 mM, pH=8.0), pyruvate sodium (244 mg, 3 eq.), cytidine-5'-triphosphate (29 mg, 1.5 eq.), MgCl<sub>2</sub> (10 mM), compound **11** (334 mg, 0.81 mmol, 1.1 eq), *E. coli* K-12 sialic acid aldolase (1 UN), *N. meningitidis* CMP-sialic acid synthetase (NmCSS, 1 UN) and *Photobacterium damsela* α-2,6-sialyltransferase (Pd2,6ST, 1 UN). The reaction mixture was incubated at 25 °C for 8 h with shaking (120 rpm). Then the reaction was allowed to boil for 5 min and cooled to room temperature. The precipitation was removed by centrifugation (6000 rpm, 10 min). The residual aqueous solution was purified by Bio-Gel P2 gel. The corresponding product **10** was converted to the trisaccharide **12** in 80% yield

<sup>13</sup>C NMR (100 MHz, CDCl<sub>3</sub>): δ 177.35, 176.92, 175.97, 105.71, 104.55, 102.83, 82.08, 77.18, 77.08, 76.19, 75.19, 74.85, 73.27, 72.46, 72.40, 71.03, 70.84, 66.14, 62.73, 54.27, 53.02, 44.68, 42.58, 24.57, 24.37.

<sup>1</sup>H NMR (400 MHz, D<sub>2</sub>O): δ 4.42 (d, *J* = 8.0 Hz, 1H), 4.31 (d, *J* = 7.8 Hz, 1H), 3.94 (ddd, *J* = 9.8, 4.6 Hz, 1H), 3.89 – 3.78 (m, 4H), 3.77 – 3.65 (m, 4H), 3.62 (dd, *J* = 10.4, 1.7 Hz, 1H), 3.57 – 3.38 (m, 10H), 3.33 (dd, *J* = 9.0, 1.6 Hz, 1H), 3.24 (dd, *J* = 8.5 Hz, 1H), 3.16 (dd, *J* = 14.0, 7.9 Hz, 1H), 2.58 (dd, *J* = 12.4, 4.6 Hz, 1H), 1.90 (s, 3H), 1.90 (s, 3H), 1.61 (dd, *J* = 12.2 Hz, 1H).

HRMS C<sub>27</sub>H<sub>44</sub>N<sub>5</sub> O<sub>19</sub> [M-H<sup>+</sup>]=742.2640(742.2630)

6. The conformational screen of compounds **5e**, **3b**, **5c**,

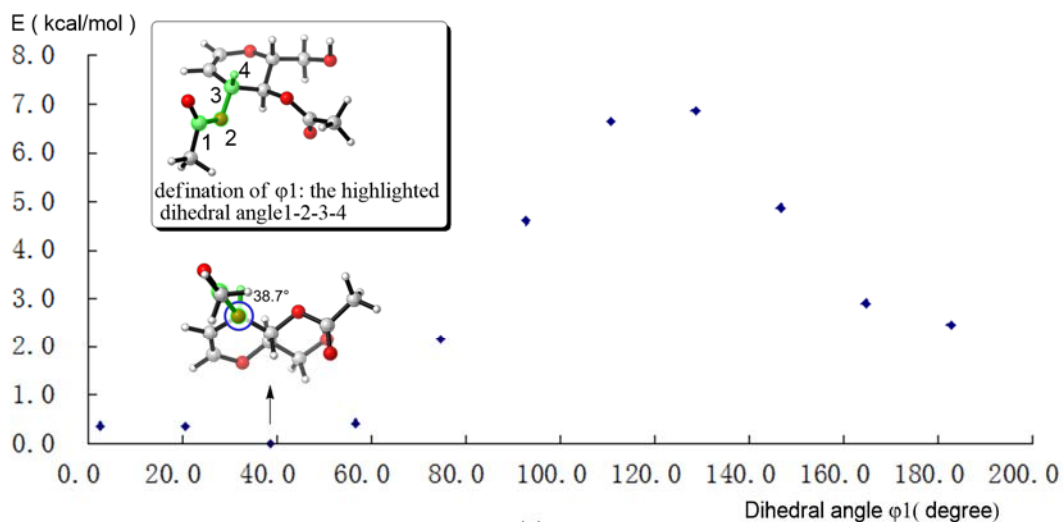

(a)

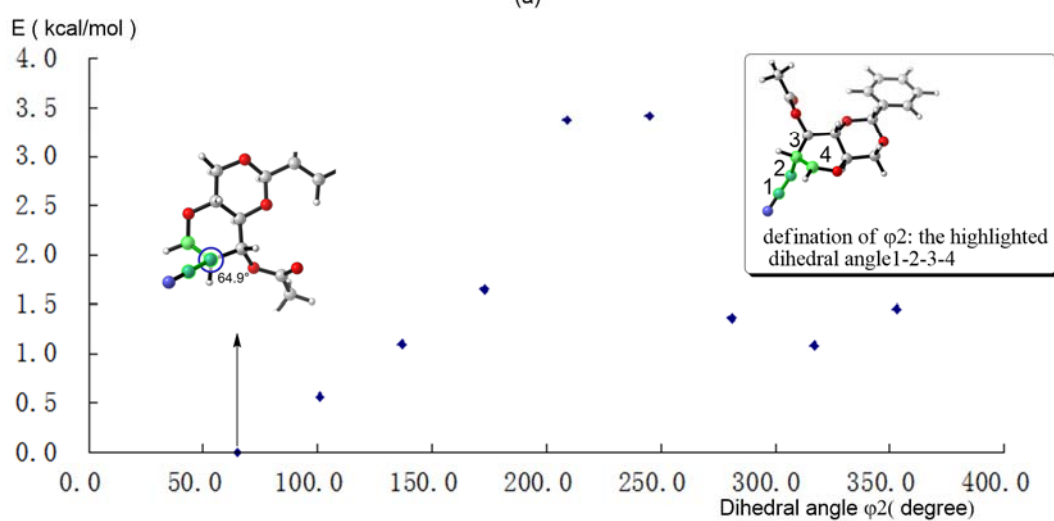

(b)

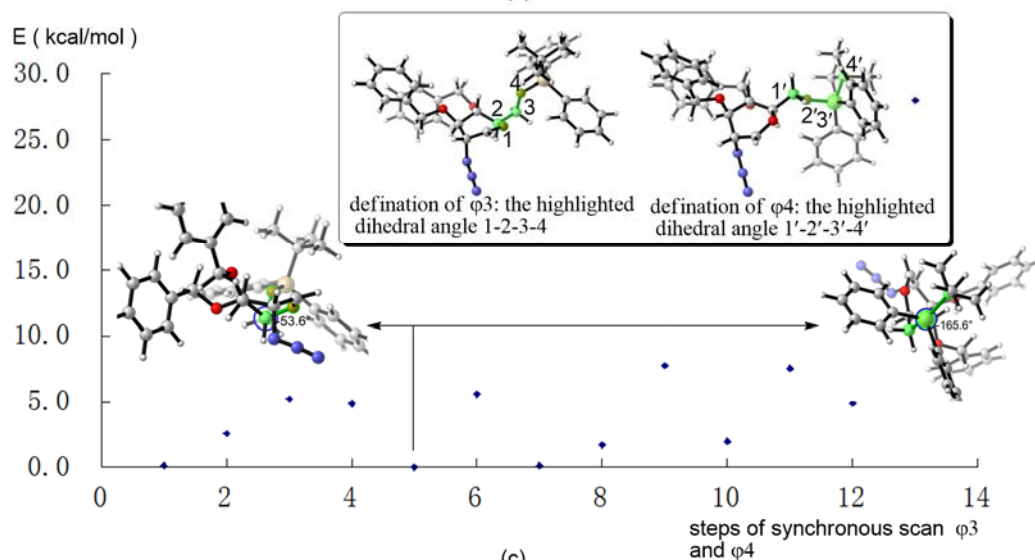

(c)

**Figure S1.** Scan of the torsion angles to determine (a) the compound **5e** orientation (b) the compound **3b** orientation (c) the compound **5c** orientation



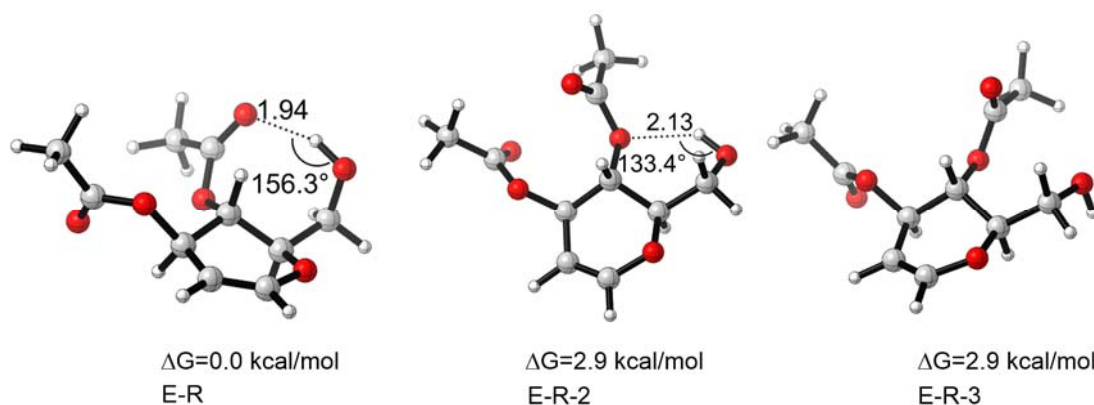

**Figure S2.** Geometries and relative Gibbs free energies of isomers of E-R. All energies are relative to E-R in Figure 1(b).

In order to locate the most stable geometries of ManNAc derivatives C, E and P, we performed conformational search by using torsional angle scan method. As illustrated in Figure S1, we investigated the potential energy versus group orientations, and presented the geometry and torsion angle of each energy minima.

Based on the most stable geometries as shown in Figure S1 (a), we further confirmed hydrogen bond structure which was implied by experiment. As shown in Figure S2, we compared the free energies of three possible isomers with and without hydrogen bond, including E-R, E-R-2 and E-R-3.

The most stable isomer (E-R) involves O---H-O hydrogen bonding which lies in an eight-membered ring. Though E-R-2 also involves O---H-O hydrogen bonding, it is 2.9 kcal/mol less stable than E-R due to the more strained six-membered ring with hydrogen bonding. The isomer E-R-3 does not involve hydrogen bonding, and it is 2.9 kcal/mol less stable than E-R. The stability of E-R comes from a stronger hydrogen bond interaction, which can be indicated in shorter hydrogen bond length(O---H) and larger hydrogen bond angle(O---H-O). As shown in Figure S1, the hydrogen bond length of E-R is 1.94 Å, shorter than that of E-R-2 and the hydrogen bond angle is 156.3°, larger than that of E-R-2. Thus, the free energy of E-R is lower than that of E-R-2.

Based on the most stable geometries as shown in Figure S1 and S2, we computed the reaction pathways as discussed in Figure 1 and Figure 3 in the text.

## 7. Electron density study of intermediates

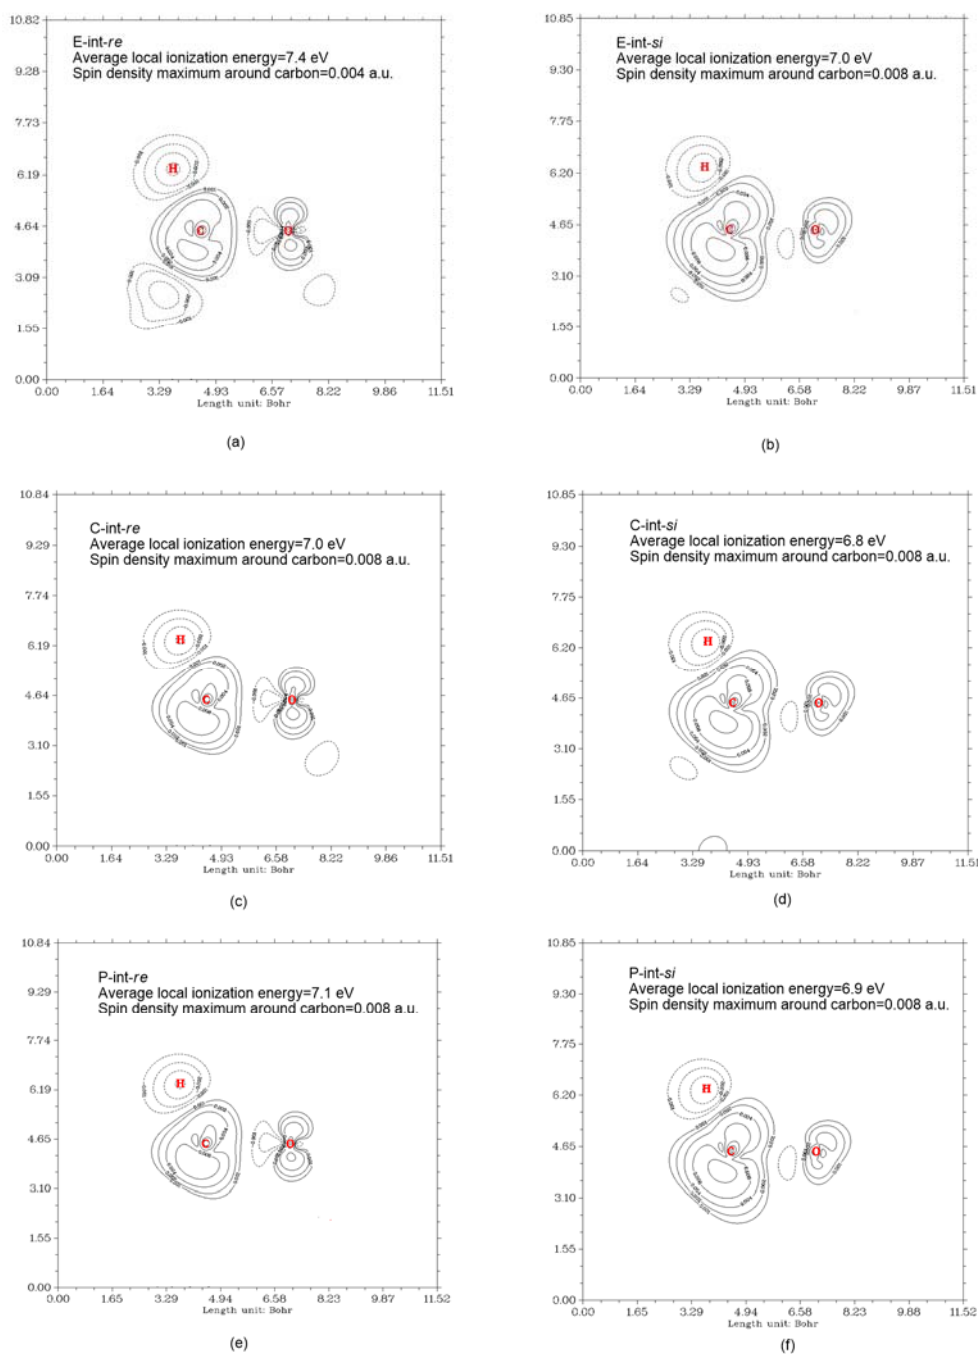

**Figure S3.** Spin electron density contour maps and average local ionization energy of intermediates: (a),(b) intermediates of compound **5e**, (c),(d) intermediates of compound **5c**, (e),(f) intermediates of compound **3b**,

In order to measure the oxidizability of intermediates of compound **5e**, **5c**, **3b**, we calculated average local ionization energies and spin electron density contour maps. As shown in Figure S3, the average local ionization energy of intermediate of compound **5e** in the axial addition is 7.4 eV, which is obviously larger than that of

intermediate of compound **5e** in the equatorial addition (7.0 eV). And the Spin density maximum around carbon of intermediate of compound **5e** in the equatorial addition is 0.004 a.u., which is lower than that in the axial addition (0.008 a.u.). Both evidences indicate that the oxidizability of intermediate of compound **5e** in the equatorial addition is obviously worse than that in the axial addition, making it likely to transform to intermediate of compound **5e** in the axial addition via thermodynamic equilibrium as shown in Figure 1(b) of the text, thus confirming the thermodynamic-control mechanism. In comparison, the oxidizability differences between intermediates of compound **5c** and **3b** are relatively small (**5c** equatorial addition: 7.0 eV, 0.008 a.u. versus **5c** axial addition: 6.8 eV, 0.008 a.u., **3b** equatorial addition: 7.1 eV, 0.008 a.u. versus **3b** axial addition: 6.9 eV, 0.008 a.u.), thus confirming the kinetic-control mechanism.

8. The Cartesian coordinates (Å), SCF energies and Gibbs free energies at 298K for the optimized structures.

N<sub>3</sub>, UB3LYP/6-31G(d)

Total SCF energy in solvent acetonitrile: -164.1385430 a.u.

Thermal free energy correction in gas phase: -0.009946 a.u.

Gibbs free energy in solvent acetonitrile at 298K: -164.1484890 a.u.

Gibbs free energy in gas phase at 298K: -164.1484880 a.u.

UX3LYP/6-311+G(d,p)

Total SCF energy in solvent acetonitrile: -164.118764 a.u.

Gibbs free energy in solvent acetonitrile at 298K: -164.131207 a.u.

Charge and Multiplicity: 0 2

Cartesian coordinates:

| ATOM | X           | Y           | Z          |
|------|-------------|-------------|------------|
| N    | 1.16272700  | 0.22410700  | 0.00000000 |
| N    | 0.00000000  | 0.00073300  | 0.00000000 |
| N    | -1.16272700 | -0.22484000 | 0.00000000 |

E-Reactant, B3LYP/6-31G(d)

Total SCF energy in solvent acetonitrile: -840.8464030 a.u.

Thermal free energy correction in gas phase: 0.1959300 a.u.

Gibbs free energy in solvent acetonitrile at 298K: -840.6504730 a.u.

Gibbs free energy in gas phase at 298K: -840.6316510 a.u.

UX3LYP/6-311+G(d,p)

Total SCF energy in solvent acetonitrile: -840.7618986 a.u.

Gibbs free energy in solvent acetonitrile at 298K: -1004.697176 a.u.

Charge and Multiplicity: 0 1

Cartesian coordinates:

| ATOM | X          | Y           | Z           |
|------|------------|-------------|-------------|
| C    | 0.46056700 | -0.17449300 | -0.05808900 |
| C    | 1.83462700 | -0.59263000 | -0.60279200 |

|   |             |             |             |
|---|-------------|-------------|-------------|
| O | 2.20992100  | -1.88259300 | -0.09155600 |
| C | 1.23059200  | -2.82064600 | -0.02940200 |
| C | -0.07805800 | -2.59200800 | -0.18154400 |
| C | -0.61554900 | -1.20905900 | -0.38861100 |
| O | 0.04734500  | 1.06470200  | -0.67960800 |
| C | 0.17120800  | 2.22426500  | -0.00038900 |
| O | -1.73677700 | -1.01753500 | 0.51938000  |
| C | -2.84559600 | -0.39251400 | 0.04260200  |
| C | 2.96372100  | 0.37531800  | -0.22751800 |
| O | 0.75316700  | 2.33779400  | 1.06233300  |
| H | 0.52273000  | -0.03995600 | 1.02375500  |
| H | 1.77287400  | -0.66684900 | -1.69990900 |
| H | 1.64670500  | -3.80491100 | 0.16175600  |
| H | -0.78115600 | -3.41550900 | -0.12905500 |
| H | -0.98954700 | -1.03925500 | -1.40285500 |
| H | 2.84657100  | 1.29526400  | -0.82139500 |
| C | -3.89355700 | -0.29765700 | 1.12728800  |
| H | -3.49828900 | 0.25556900  | 1.98552100  |
| H | -4.77820600 | 0.20488500  | 0.73493000  |
| H | -4.15920000 | -1.29903800 | 1.48130900  |
| O | -2.96935400 | 0.02090900  | -1.08855800 |
| C | -0.50603700 | 3.34762400  | -0.74263300 |
| H | -0.45316400 | 4.26216800  | -0.15155300 |
| H | -0.01374500 | 3.50250000  | -1.70881200 |
| H | -1.54687100 | 3.07992700  | -0.94933100 |
| H | 3.90640400  | -0.09243800 | -0.53006600 |
| O | 3.05117600  | 0.63551300  | 1.15319200  |
| H | 2.34957400  | 1.27812600  | 1.37076800  |

E-Ts-*re*, UB3LYP/6-31G(d)

Total SCF energy in solvent acetonitrile: -1004.982526 a.u.

Thermal free energy correction in gas phase: 0.200893 a.u.

Gibbs free energy in solvent acetonitrile at 298K: -1004.781633 a.u.

Gibbs free energy in gas phase at 298K: -1004.762593 a.u.

UX3LYP/6-311+G(d,p)

Total SCF energy in solvent acetonitrile: -1004.880118 a.u.

Gibbs free energy in solvent acetonitrile at 298K: -1004.679225 a.u.

Charge and Multiplicity: 0 2

Cartesian coordinates:

| ATOM | X           | Y           | Z           |
|------|-------------|-------------|-------------|
| C    | -0.39740400 | -0.46219700 | -0.10618400 |
| C    | 0.40841600  | -1.76060100 | 0.03240500  |
| O    | 1.43065300  | -1.80134300 | -0.99554100 |

|   |             |             |             |
|---|-------------|-------------|-------------|
| C | 2.14006100  | -0.68599000 | -1.19346400 |
| C | 1.89450000  | 0.51210400  | -0.52412000 |
| C | 0.48615400  | 0.79164200  | -0.03541700 |
| O | -1.34388200 | -0.37589800 | 0.97786300  |
| C | -2.65285800 | -0.60968900 | 0.72974700  |
| O | -0.04022200 | 1.81604600  | -0.91685200 |
| C | -0.94154800 | 2.69802900  | -0.39924300 |
| C | -0.43827500 | -3.02499200 | -0.14670000 |
| O | -3.07044000 | -1.09902400 | -0.30328500 |
| H | -0.92799400 | -0.48349700 | -1.06101300 |
| H | 0.91978400  | -1.77733100 | 1.00317800  |
| H | 2.99456300  | -0.84843700 | -1.84140900 |
| H | 2.42840300  | 1.38197600  | -0.89213300 |
| H | 0.49685800  | 1.17527900  | 0.98559600  |
| H | -1.05578700 | -3.15593100 | 0.75479500  |
| N | 2.75864100  | 0.39759100  | 1.22747900  |
| N | 3.96604300  | 0.32666800  | 1.08300500  |
| N | 5.11509600  | 0.25777200  | 0.95280600  |
| C | -1.32850600 | 3.71846600  | -1.44208400 |
| H | -1.76281600 | 3.21840000  | -2.31392200 |
| H | -2.04962500 | 4.41636400  | -1.01586900 |
| H | -0.44152400 | 4.26082900  | -1.78509900 |
| O | -1.36089900 | 2.65126900  | 0.73427900  |
| C | -3.49948500 | -0.16479700 | 1.89056100  |
| H | -4.53605500 | -0.45995400 | 1.72675100  |
| H | -3.12279500 | -0.59511200 | 2.82345500  |
| H | -3.42285500 | 0.92439900  | 1.97996900  |
| H | 0.24746900  | -3.87676100 | -0.20106800 |
| O | -1.20142500 | -3.02435500 | -1.32965700 |
| H | -1.98271300 | -2.45983900 | -1.17371500 |

E-Int-*re*, UB3LYP/6-31G(d)

Total SCF energy in solvent acetonitrile:-1004.987374 a.u.

Thermal free energy correction in gas phase: 0.203018 a.u.

Gibbs free energy in solvent acetonitrile at 298K: -1004.784356 a.u.

Gibbs free energy in gas phase at 298K: -1004.768550 a.u.

UX3LYP/6-311+G(d,p)

Total SCF energy in solvent acetonitrile: -1004.881873 a.u.

Gibbs free energy in solvent acetonitrile at 298K: -1004.678855 a.u.

Charge and Multiplicity: 0 2

Cartesian coordinates:

| ATOM | X           | Y           | Z           |
|------|-------------|-------------|-------------|
| C    | -0.33730500 | -0.39208900 | -0.06561700 |
| C    | 0.56287800  | -1.61997000 | -0.27297000 |

|   |             |             |             |
|---|-------------|-------------|-------------|
| O | 1.50694700  | -1.34892400 | -1.32672800 |
| C | 2.16647600  | -0.16498000 | -1.27276700 |
| C | 1.94630300  | 0.76692800  | -0.15384100 |
| C | 0.44793000  | 0.91743600  | 0.16347100  |
| O | -1.16460900 | -0.60804000 | 1.09666700  |
| C | -2.47399700 | -0.89198800 | 0.91458000  |
| O | -0.02338200 | 1.95977700  | -0.72053300 |
| C | -1.18763100 | 2.57659500  | -0.38532800 |
| C | -0.21760900 | -2.87409100 | -0.68623200 |
| O | -2.95815100 | -1.21102300 | -0.15496500 |
| H | -0.96728300 | -0.28185700 | -0.95035900 |
| H | 1.12002300  | -1.82278000 | 0.65126300  |
| H | 2.99893700  | -0.10564100 | -1.96234400 |
| H | 2.35587400  | 1.75136100  | -0.40035300 |
| H | 0.31346800  | 1.23604900  | 1.19878900  |
| H | -0.74291200 | -3.26008500 | 0.20060100  |
| N | 2.56896400  | 0.32079300  | 1.18523900  |
| N | 3.79620100  | 0.19539300  | 1.16470700  |
| N | 4.92892700  | 0.05192700  | 1.23118100  |
| C | -1.51698100 | 3.66203100  | -1.38028500 |
| H | -1.63152300 | 3.22924300  | -2.37959700 |
| H | -2.44151900 | 4.15752500  | -1.08305600 |
| H | -0.70063400 | 4.38959100  | -1.43096500 |
| O | -1.85236200 | 2.27645400  | 0.58141800  |
| C | -3.23983100 | -0.73854300 | 2.19991000  |
| H | -4.22110600 | -1.20427800 | 2.10397200  |
| H | -2.68582600 | -1.17229500 | 3.03682200  |
| H | -3.35793000 | 0.33280100  | 2.39827400  |
| H | 0.51443500  | -3.62945700 | -0.99012100 |
| O | -1.08669200 | -2.66957900 | -1.77572700 |
| H | -1.88805800 | -2.23425100 | -1.42740400 |

E-Ts-*si*, UB3LYP/6-31G(d)

Total SCF energy in solvent acetonitrile:-1004.984087 a.u.

Thermal free energy correction in gas phase: 0.202635 a.u.

Gibbs free energy in solvent acetonitrile at 298K: -1004.781452 a.u.

Gibbs free energy in gas phase at 298K: -1004.759373 a.u.

UX3LYP/6-311+G(d,p)

Total SCF energy in solvent acetonitrile: -1004.885222 a.u.

Gibbs free energy in solvent acetonitrile at 298K: -1004.682587 a.u.

Charge and Multiplicity: 0 2

Cartesian coordinates:

| ATOM | X          | Y           | Z           |
|------|------------|-------------|-------------|
| C    | 0.83015300 | -0.03825500 | -0.21903300 |

|   |             |             |             |
|---|-------------|-------------|-------------|
| C | 1.71430200  | -1.08493600 | -0.91980300 |
| O | 1.10997800  | -2.40353900 | -0.89555000 |
| C | -0.22097300 | -2.52511500 | -0.94001700 |
| C | -1.11209600 | -1.49295400 | -0.66303400 |
| C | -0.58649200 | -0.07792900 | -0.77503600 |
| O | 1.35573200  | 1.27694200  | -0.50145600 |
| C | 2.12160600  | 1.88118200  | 0.43775300  |
| O | -1.37905900 | 0.86506900  | -0.04092700 |
| C | -2.48753300 | 1.34736200  | -0.67576400 |
| C | 3.11182800  | -1.23526000 | -0.30454300 |
| O | 2.52524500  | 1.33287300  | 1.44388500  |
| H | 0.81043500  | -0.21241300 | 0.85753200  |
| H | 1.81725900  | -0.80558300 | -1.97786600 |
| H | -0.53304500 | -3.55718900 | -1.05243900 |
| H | -0.59219200 | 0.22442900  | -1.82825800 |
| H | 3.70753600  | -0.35407800 | -0.58820600 |
| N | -1.37350000 | -1.63697400 | 1.30969900  |
| N | -2.53869200 | -1.36321000 | 1.51402100  |
| N | -3.65288900 | -1.10142700 | 1.71599200  |
| C | -3.26173800 | 2.26355000  | 0.23482100  |
| H | -2.59402000 | 2.96083500  | 0.74833500  |
| H | -4.01052600 | 2.80441900  | -0.34488800 |
| H | -3.75981900 | 1.65439300  | 0.99789500  |
| O | -2.79307800 | 1.03336000  | -1.80397100 |
| C | 2.39701000  | 3.31466800  | 0.06464200  |
| H | 3.11836900  | 3.74065800  | 0.76217500  |
| H | 2.77626500  | 3.37584400  | -0.95985700 |
| H | 1.46413200  | 3.88747700  | 0.10256000  |
| H | 3.57929200  | -2.10968300 | -0.76931000 |
| O | 3.09719000  | -1.45179400 | 1.08304500  |
| H | 2.95415000  | -0.58382500 | 1.50507400  |
| H | -2.14673700 | -1.65118800 | -0.95085100 |

E-Int-*si*, UB3LYP/6-31G(d)

Total SCF energy in solvent acetonitrile: -1004.993075 a.u.

Thermal free energy correction in gas phase: 0.204432 a.u.

Gibbs free energy in solvent acetonitrile at 298K: -1004.788643 a.u.

Gibbs free energy in gas phase at 298K: -1004.770387 a.u.

UX3LYP/6-311+G(d,p)

Total SCF energy in solvent acetonitrile: -1004.890987 a.u.

Gibbs free energy in solvent acetonitrile at 298K: -1004.686555 a.u.

Charge and Multiplicity: 0 2

Cartesian coordinates:

| ATOM | X | Y | Z |
|------|---|---|---|
|------|---|---|---|

|   |             |             |             |
|---|-------------|-------------|-------------|
| C | 0.81431800  | -0.06014600 | -0.18241000 |
| C | 1.67557400  | -1.12937300 | -0.88002600 |
| O | 1.06183000  | -2.42667800 | -0.78491100 |
| C | -0.26361600 | -2.52575200 | -1.06876800 |
| C | -1.20393000 | -1.50634300 | -0.52719200 |
| C | -0.61340700 | -0.09650400 | -0.70746500 |
| O | 1.33540900  | 1.25197100  | -0.49934900 |
| C | 2.12054900  | 1.87498300  | 0.40789800  |
| O | -1.37548700 | 0.87809700  | 0.02332700  |
| C | -2.44231200 | 1.43378200  | -0.62200000 |
| C | 3.08677200  | -1.26347400 | -0.29267500 |
| O | 2.53027000  | 1.35747800  | 1.42854000  |
| H | 0.82818800  | -0.21265200 | 0.89793400  |
| H | 1.75491600  | -0.86763100 | -1.94631700 |
| H | -0.58122300 | -3.55940600 | -1.15741700 |
| H | -0.63682300 | 0.15985700  | -1.77026800 |
| H | 3.68252800  | -0.39670800 | -0.61848900 |
| N | -1.43431700 | -1.77337100 | 0.94806900  |
| N | -2.53825000 | -1.41796200 | 1.37002300  |
| N | -3.53758500 | -1.14418100 | 1.85531600  |
| C | -3.16381100 | 2.39605100  | 0.28619000  |
| H | -2.45888500 | 3.08605100  | 0.75883400  |
| H | -3.91100900 | 2.94618100  | -0.28657100 |
| H | -3.65763600 | 1.83129200  | 1.08532800  |
| O | -2.75642800 | 1.15022800  | -1.75534300 |
| C | 2.41352200  | 3.29100700  | -0.01781300 |
| H | 3.12890100  | 3.73822000  | 0.67256100  |
| H | 2.81036600  | 3.30616000  | -1.03752900 |
| H | 1.48638200  | 3.87402900  | -0.01998500 |
| H | 3.53726900  | -2.15713100 | -0.73664600 |
| O | 3.10817700  | -1.43212400 | 1.10380000  |
| H | 2.97688600  | -0.55003900 | 1.49886900  |
| H | -2.16090600 | -1.56678500 | -1.05711100 |

C-Reactant, B3LYP/6-31G(d)

Total SCF energy in solvent acetonitrile: -1986.360252 a.u.

Thermal free energy correction in gas phase: 0.6005280 a.u.

Gibbs free energy in solvent acetonitrile at 298K: -1985.759724 a.u.

Gibbs free energy in gas phase at 298K: -1985.722157 a.u.

UX3LYP/6-311+G(d,p)

Total SCF energy in solvent acetonitrile: -1985.996614 a.u.

Gibbs free energy in solvent acetonitrile at 298K: -2149.527293 a.u.

Charge and Multiplicity: 0 1

Cartesian coordinates:

| ATOM | X | Y | Z |
|------|---|---|---|
|------|---|---|---|



|    |             |             |             |
|----|-------------|-------------|-------------|
| C  | -1.55267500 | -0.66485500 | -0.40742900 |
| C  | -0.16247100 | -0.98894800 | -0.98189400 |
| O  | 0.11770200  | -2.39869500 | -0.88919400 |
| C  | -0.90048100 | -3.23065400 | -1.23609500 |
| C  | -2.17225400 | -2.86207400 | -1.41687200 |
| C  | -2.63538100 | -1.44950500 | -1.16343100 |
| O  | -1.73632600 | 0.73792900  | -0.53017100 |
| C  | -2.54204800 | 1.33837400  | 0.48555900  |
| C  | -2.71047400 | 2.81108000  | 0.19246400  |
| C  | -2.89244800 | 3.71406900  | 1.24641600  |
| C  | -3.10873600 | 5.06924900  | 0.99442100  |
| C  | -3.13440700 | 5.54101000  | -0.31913400 |
| C  | -2.94438500 | 4.64779700  | -1.37523100 |
| C  | -2.73765100 | 3.29118600  | -1.12211600 |
| O  | -3.82266500 | -1.41101000 | -0.36005800 |
| C  | -5.02589900 | -1.63686700 | -1.08160800 |
| C  | -6.19689600 | -1.62428200 | -0.12650200 |
| C  | -6.08425300 | -2.19372100 | 1.14802500  |
| C  | -7.18095600 | -2.21830800 | 2.00917300  |
| C  | -8.40565400 | -1.68133400 | 1.60538300  |
| C  | -8.52472800 | -1.11210900 | 0.33697200  |
| C  | -7.42378600 | -1.08014600 | -0.52077300 |
| C  | 3.07716500  | 2.58995300  | -0.03247500 |
| C  | 0.95808200  | -0.25876000 | -0.25767300 |
| O  | 2.16869200  | -0.43536600 | -0.97809400 |
| Si | 3.71008000  | -0.17748200 | -0.36615300 |
| C  | 3.70090100  | 1.47344800  | 0.56253600  |
| C  | 4.25945200  | 1.65393300  | 1.84116500  |
| C  | 3.02815700  | 3.82793400  | 0.60886000  |
| C  | 3.60548800  | 3.98303800  | 1.87060400  |
| C  | 4.21888200  | 2.89184200  | 2.48656400  |
| C  | 4.15941400  | -1.61590200 | 0.77772100  |
| C  | 5.35030000  | -1.65894000 | 1.53021600  |
| C  | 5.66473900  | -2.75403400 | 2.33663200  |
| C  | 4.79160700  | -3.84079300 | 2.40958400  |
| C  | 3.61083200  | -3.82636800 | 1.66648000  |
| C  | 3.30100800  | -2.72973400 | 0.85888000  |
| C  | 4.82894000  | -0.16007800 | -1.92382900 |
| C  | 4.70340200  | -1.52482300 | -2.63651200 |
| C  | 4.38131100  | 0.95351300  | -2.89406100 |
| C  | 6.30087300  | 0.07813200  | -1.52739800 |
| H  | -1.58447700 | -0.97088900 | 0.64905900  |
| H  | -0.13865300 | -0.70940600 | -2.04477800 |
| H  | -0.54663300 | -4.25088000 | -1.35129200 |

|   |             |             |             |
|---|-------------|-------------|-------------|
| H | -2.89773500 | -3.61278700 | -1.71221800 |
| H | -2.83667800 | -0.91372400 | -2.10581500 |
| H | -2.06552600 | 1.20255800  | 1.46959400  |
| H | -3.51702800 | 0.83633900  | 0.52441900  |
| H | -2.86268000 | 3.35480400  | 2.27312200  |
| H | -3.24761700 | 5.75702800  | 1.82458400  |
| H | -3.29633800 | 6.59719900  | -0.51779700 |
| H | -2.95704800 | 5.00781800  | -2.40097100 |
| H | -2.58194700 | 2.59667800  | -1.94107300 |
| H | -4.98026500 | -2.60776300 | -1.60277400 |
| H | -5.15647600 | -0.86502400 | -1.85731900 |
| H | -5.12867400 | -2.60227500 | 1.46127200  |
| H | -7.07962200 | -2.65810700 | 2.99809100  |
| H | -9.25957900 | -1.70193700 | 2.27733500  |
| H | -9.47096800 | -0.68367200 | 0.01706200  |
| H | -7.51912200 | -0.62436300 | -1.50411900 |
| H | 2.61200700  | 2.48989000  | -1.00994000 |
| H | 1.03672400  | -0.65663900 | 0.76412900  |
| H | 0.69886000  | 0.80285700  | -0.19711600 |
| H | 4.72131400  | 0.81495200  | 2.35333000  |
| H | 2.53614300  | 4.66875300  | 0.12654500  |
| H | 3.56996100  | 4.94629800  | 2.37320200  |
| H | 4.66050600  | 3.00088300  | 3.47410100  |
| H | 6.05333100  | -0.83027800 | 1.48759700  |
| H | 6.59109900  | -2.75903800 | 2.90577800  |
| H | 5.03317700  | -4.69438100 | 3.03798500  |
| H | 2.92886100  | -4.67203900 | 1.71255800  |
| H | 2.38341300  | -2.74470000 | 0.27729400  |
| H | 3.66924300  | -1.72833000 | -2.93550900 |
| H | 5.03668900  | -2.35085900 | -1.99784500 |
| H | 5.32435700  | -1.53606600 | -3.54430400 |
| H | 3.33463000  | 0.83092200  | -3.19425500 |
| H | 4.99548000  | 0.92638300  | -3.80604500 |
| H | 4.49595600  | 1.95066600  | -2.45370700 |
| H | 6.93503200  | 0.10437800  | -2.42528200 |
| H | 6.68494100  | -0.72050300 | -0.88209900 |
| H | 6.43517000  | 1.03321100  | -1.00424200 |

C-Ts-*re*, UB3LYP/6-31G(d)

Total SCF energy in solvent acetonitrile: -2150.498413 a.u.

Thermal free energy correction in gas phase: 0.607097 a.u.

Gibbs free energy in solvent acetonitrile at 298K: -2149.891316 a.u.

Gibbs free energy in gas phase at 298K: -2149.853340 a.u.

UX3LYP/6-311+G(d,p)

Total SCF energy in solvent acetonitrile: -2150.117057 a.u.

Gibbs free energy in solvent acetonitrile at 298K: -2149.50996 a.u.

Charge and Multiplicity: 0 2

Cartesian coordinates:

| ATOM | X           | Y           | Z           |
|------|-------------|-------------|-------------|
| C    | 1.19066300  | -0.02278900 | -0.07073700 |
| C    | -0.13686100 | -0.45546100 | 0.57230900  |
| O    | -0.29377000 | -1.89071300 | 0.42078200  |
| C    | 0.77618500  | -2.64225900 | 0.70600300  |
| C    | 2.00585900  | -2.11528700 | 1.09351500  |
| C    | 2.37623100  | -0.70303100 | 0.63885400  |
| O    | 1.22451200  | 1.39091800  | -0.00241600 |
| C    | 2.19164100  | 2.05888800  | -0.81708700 |
| C    | 3.40103500  | 2.54444500  | -0.04085700 |
| C    | 4.62710900  | 2.71835500  | -0.69326700 |
| C    | 5.73213000  | 3.22492100  | -0.00695800 |
| C    | 5.62567700  | 3.55567600  | 1.34564400  |
| C    | 4.40684300  | 3.37998400  | 2.00420600  |
| C    | 3.29997600  | 2.88262300  | 1.31397400  |
| O    | 3.44659200  | -0.75294800 | -0.30005800 |
| C    | 4.74302300  | -0.84492900 | 0.29298800  |
| C    | 5.77535400  | -1.06235900 | -0.78803600 |
| C    | 5.50728700  | -1.89719900 | -1.88003000 |
| C    | 6.48405000  | -2.13028500 | -2.84790500 |
| C    | 7.74406700  | -1.53852300 | -2.73284600 |
| C    | 8.01800400  | -0.70491600 | -1.64774200 |
| C    | 7.03609200  | -0.46423700 | -0.68503000 |
| C    | -3.70919800 | 2.90220100  | 0.26992900  |
| C    | -1.35850100 | 0.19101100  | -0.05957900 |
| O    | -2.50466400 | -0.17072100 | 0.69111400  |
| Si   | -4.09588400 | 0.06628400  | 0.20160400  |
| C    | -4.23406200 | 1.82823100  | -0.47938800 |
| C    | -4.80398800 | 2.13346200  | -1.72904900 |
| C    | -3.76608200 | 4.21552300  | -0.19738700 |
| C    | -4.35195900 | 4.49167000  | -1.43436600 |
| C    | -4.86803600 | 3.44649100  | -2.20067900 |
| C    | -4.51146200 | -1.22176000 | -1.11943100 |
| C    | -5.72212200 | -1.22663600 | -1.84080300 |
| C    | -6.00791800 | -2.21992400 | -2.77912100 |
| C    | -5.08622800 | -3.24055800 | -3.01872200 |
| C    | -3.88441700 | -3.26379500 | -2.31025200 |
| C    | -3.60367300 | -2.26884700 | -1.37134600 |
| C    | -5.12145200 | -0.23582200 | 1.79153600  |
| C    | -4.84755300 | -1.67458300 | 2.28362800  |

|   |             |             |             |
|---|-------------|-------------|-------------|
| C | -4.71499300 | 0.75635700  | 2.90168200  |
| C | -6.62801900 | -0.07400300 | 1.49774700  |
| H | 1.19679500  | -0.35533100 | -1.12124400 |
| H | -0.12102000 | -0.24342100 | 1.64767000  |
| H | 0.54604600  | -3.70248000 | 0.70700500  |
| H | 2.82436000  | -2.82781100 | 1.12273700  |
| H | 2.65752100  | -0.10008400 | 1.50972400  |
| H | 1.66359400  | 2.92051000  | -1.24750500 |
| H | 2.50804000  | 1.41267600  | -1.64385900 |
| H | 4.72314200  | 2.44626600  | -1.74203500 |
| H | 6.67766000  | 3.35145100  | -0.52779100 |
| H | 6.48631700  | 3.94546700  | 1.88268600  |
| H | 4.31556800  | 3.63217300  | 3.05751000  |
| H | 2.35167100  | 2.74487000  | 1.82426300  |
| H | 4.76868200  | -1.68251200 | 1.00886200  |
| H | 4.96085600  | 0.07156500  | 0.85795000  |
| H | 4.52476500  | -2.34957200 | -1.97262800 |
| H | 6.26187600  | -2.77654300 | -3.69326400 |
| H | 8.50518500  | -1.72293800 | -3.48637900 |
| H | 8.99312000  | -0.23404400 | -1.55371100 |
| H | 7.24746400  | 0.19890100  | 0.15049600  |
| H | -3.23954100 | 2.71147400  | 1.23174000  |
| H | -1.43904300 | -0.14308200 | -1.10431200 |
| H | -1.21454100 | 1.27585600  | -0.05766800 |
| H | -5.19311300 | 1.33581800  | -2.35493700 |
| H | -3.35188200 | 5.02221100  | 0.40224300  |
| H | -4.39926100 | 5.51401600  | -1.80072000 |
| H | -5.31591400 | 3.65104900  | -3.16998900 |
| H | -6.46253300 | -0.44862300 | -1.66954000 |
| H | -6.95037700 | -2.19790200 | -3.32059700 |
| H | -5.30633900 | -4.01481300 | -3.74928700 |
| H | -3.16513000 | -4.06013500 | -2.48553000 |
| H | -2.66991500 | -2.31317400 | -0.81744200 |
| H | -3.78734800 | -1.82589800 | 2.51395700  |
| H | -5.14084000 | -2.42374200 | 1.53927800  |
| H | -5.42182500 | -1.87487300 | 3.19977600  |
| H | -3.64606000 | 0.68945900  | 3.13361800  |
| H | -5.26975600 | 0.53378000  | 3.82464000  |
| H | -4.94266500 | 1.79286900  | 2.62793000  |
| H | -7.21044400 | -0.23965600 | 2.41538900  |
| H | -6.98103200 | -0.79866400 | 0.75481400  |
| H | -6.87104400 | 0.93240500  | 1.13431000  |
| N | 1.92542400  | -1.78676200 | 3.03113000  |
| N | 1.79494000  | -2.84251500 | 3.62202000  |

N 1.67102900 -3.84552800 4.19051100

C-Int-re, UB3LYP/6-31G(d)

Total SCF energy in solvent acetonitrile:-2150.502556 a.u.

Thermal free energy correction in gas phase: 0.608249 a.u.

Gibbs free energy in solvent acetonitrile at 298K: -2149.894307 a.u.

Gibbs free energy in gas phase at 298K: -2149.859937 a.u.

UX3LYP/6-311+G(d,p)

Total SCF energy in solvent acetonitrile: -2150.119883 a.u.

Gibbs free energy in solvent acetonitrile at 298K: -2149.511634 a.u.

Charge and Multiplicity: 0 2

Cartesian coordinates:

| ATOM | X           | Y           | Z           |
|------|-------------|-------------|-------------|
| C    | 1.20732300  | 0.04030600  | 0.04538500  |
| C    | -0.12972100 | -0.38688900 | 0.67500700  |
| O    | -0.28889900 | -1.81127900 | 0.50436700  |
| C    | 0.81024600  | -2.57746300 | 0.72546900  |
| C    | 2.00335900  | -2.00369600 | 1.37445700  |
| C    | 2.39657900  | -0.62771200 | 0.76595900  |
| O    | 1.25221900  | 1.45667300  | 0.08497200  |
| C    | 2.21012700  | 2.09661700  | -0.76040800 |
| C    | 3.44755500  | 2.57231300  | -0.02217900 |
| C    | 4.66455800  | 2.69865300  | -0.70189200 |
| C    | 5.79521700  | 3.19441600  | -0.04991700 |
| C    | 5.72345200  | 3.56232300  | 1.29535100  |
| C    | 4.51368300  | 3.43428000  | 1.98122800  |
| C    | 3.38176900  | 2.94742300  | 1.32524400  |
| O    | 3.42639400  | -0.76656600 | -0.20255900 |
| C    | 4.74298000  | -0.86094400 | 0.33939700  |
| C    | 5.72470300  | -1.13992900 | -0.77444900 |
| C    | 5.39223600  | -2.00545000 | -1.82407300 |
| C    | 6.32108000  | -2.29261100 | -2.82405900 |
| C    | 7.59670900  | -1.72491100 | -2.78367600 |
| C    | 7.93451700  | -0.86117200 | -1.74094900 |
| C    | 7.00061800  | -0.56645300 | -0.74601500 |
| C    | -3.74552200 | 2.93292400  | 0.05926500  |
| C    | -1.33414200 | 0.27839800  | 0.02706100  |
| O    | -2.50060700 | -0.06114600 | 0.76061600  |
| Si   | -4.07267800 | 0.09163100  | 0.18942800  |
| C    | -4.22659200 | 1.79644100  | -0.62435600 |
| C    | -4.76633700 | 1.99855300  | -1.90784100 |
| C    | -3.81664800 | 4.20792500  | -0.50257500 |
| C    | -4.37300900 | 4.38168800  | -1.77139600 |
| C    | -4.84476900 | 3.27287100  | -2.47424200 |

|   |             |             |             |
|---|-------------|-------------|-------------|
| C | -4.41035700 | -1.29748500 | -1.04925700 |
| C | -5.60205200 | -1.38543000 | -1.79651200 |
| C | -5.83610400 | -2.44503400 | -2.67441400 |
| C | -4.87918700 | -3.45016000 | -2.82566700 |
| C | -3.69489000 | -3.39025400 | -2.09035500 |
| C | -3.46536300 | -2.32915400 | -1.21160100 |
| C | -5.15922100 | -0.11110200 | 1.75457900  |
| C | -4.86991300 | -1.49416600 | 2.38044900  |
| C | -4.82848100 | 0.98389200  | 2.79083200  |
| C | -6.65582700 | -0.02161100 | 1.38830800  |
| H | 1.21941400  | -0.31185700 | -0.99800300 |
| H | -0.12982900 | -0.16658300 | 1.74995300  |
| H | 0.58680600  | -3.63817100 | 0.71763700  |
| H | 2.84039000  | -2.70143100 | 1.26466000  |
| H | 2.72138900  | 0.02677000  | 1.58425300  |
| H | 1.68756100  | 2.96193500  | -1.19026600 |
| H | 2.49518500  | 1.43451400  | -1.58648400 |
| H | 4.73283800  | 2.39812800  | -1.74506500 |
| H | 6.73310000  | 3.28435500  | -0.59182600 |
| H | 6.60377900  | 3.94417500  | 1.80555500  |
| H | 4.44933600  | 3.71643000  | 3.02897400  |
| H | 2.44003500  | 2.84673300  | 1.85620800  |
| H | 4.78509500  | -1.67191100 | 1.08547800  |
| H | 5.00175000  | 0.07241600  | 0.85807600  |
| H | 4.39709300  | -2.43793500 | -1.85868300 |
| H | 6.04890400  | -2.96183400 | -3.63625400 |
| H | 8.32035800  | -1.95095000 | -3.56237100 |
| H | 8.92210200  | -0.40853300 | -1.70556700 |
| H | 7.26171400  | 0.12043800  | 0.05568800  |
| H | -3.29840900 | 2.82151400  | 1.04403400  |
| H | -1.40271100 | -0.05628300 | -1.01800500 |
| H | -1.17775800 | 1.36138600  | 0.03025800  |
| H | -5.11871400 | 1.14912200  | -2.48556700 |
| H | -3.43642100 | 5.06471100  | 0.04818600  |
| H | -4.43133000 | 5.37399700  | -2.21147400 |
| H | -5.26867500 | 3.39739500  | -3.46765200 |
| H | -6.36829900 | -0.62064400 | -1.69306800 |
| H | -6.76513700 | -2.48665200 | -3.23761000 |
| H | -5.05829400 | -4.27642900 | -3.50904100 |
| H | -2.94785600 | -4.17298900 | -2.19798100 |
| H | -2.54262400 | -2.30738300 | -0.63850100 |
| H | -3.81971100 | -1.59074900 | 2.67647400  |
| H | -5.10066500 | -2.31227500 | 1.68836000  |
| H | -5.48712000 | -1.63591700 | 3.27954300  |

|   |             |             |            |
|---|-------------|-------------|------------|
| H | -3.76716500 | 0.97600900  | 3.06365800 |
| H | -5.40953200 | 0.81894200  | 3.70981000 |
| H | -5.08009400 | 1.98461000  | 2.42161100 |
| H | -7.27153800 | -0.12275000 | 2.29367800 |
| H | -6.95757300 | -0.82016500 | 0.70079700 |
| H | -6.91046800 | 0.94041300  | 0.92599500 |
| N | 1.82391300  | -1.73187400 | 2.88384900 |
| N | 1.56827900  | -2.72905800 | 3.56314000 |
| N | 1.32727100  | -3.60067000 | 4.26450400 |

C-Ts-*si*, UB3LYP/6-31G(d)

Total SCF energy in solvent acetonitrile:-2150.500601 a.u.

Thermal free energy correction in gas phase: 0.605053 a.u.

Gibbs free energy in solvent acetonitrile at 298K: -2149.895548 a.u.

Gibbs free energy in gas phase at 298K: -2149.854328 a.u.

UX3LYP/6-311+G(d,p)

Total SCF energy in solvent acetonitrile: -2150.120832 a.u.

Gibbs free energy in solvent acetonitrile at 298K: -2149.515779 a.u.

Charge and Multiplicity: 0 2

Cartesian coordinates:

| ATOM | X           | Y           | Z           |
|------|-------------|-------------|-------------|
| C    | 1.37158600  | -0.48645600 | 0.38626100  |
| C    | 0.01279800  | -0.79106600 | 1.04240100  |
| O    | -0.22585200 | -2.21354300 | 1.22575100  |
| C    | 0.81027300  | -3.03000500 | 1.44645200  |
| C    | 2.14180100  | -2.70478900 | 1.20922300  |
| C    | 2.49669700  | -1.22819500 | 1.11959500  |
| O    | 1.54094400  | 0.91737700  | 0.48323600  |
| C    | 2.17029300  | 1.52593300  | -0.66086100 |
| C    | 2.39279700  | 2.98518100  | -0.36006600 |
| C    | 3.63454200  | 3.42734100  | 0.11067300  |
| C    | 3.84293000  | 4.77468700  | 0.40854600  |
| C    | 2.80660200  | 5.69489900  | 0.24106400  |
| C    | 1.56291700  | 5.26245500  | -0.22498500 |
| C    | 1.35861300  | 3.91527100  | -0.52336900 |
| O    | 3.70589500  | -0.94437000 | 0.45195000  |
| C    | 4.89162100  | -1.25901200 | 1.17571000  |
| C    | 6.08376000  | -0.93768900 | 0.30789800  |
| C    | 6.14538200  | -1.43253200 | -1.00227200 |
| C    | 7.25290300  | -1.16168100 | -1.80371500 |
| C    | 8.31327500  | -0.39913000 | -1.30523400 |
| C    | 8.25721000  | 0.09643800  | -0.00275400 |
| C    | 7.14332400  | -0.16864600 | 0.79780400  |
| C    | -3.08700400 | 2.74079100  | 0.01827300  |

|    |             |             |             |
|----|-------------|-------------|-------------|
| C  | -1.15244900 | -0.24761900 | 0.23282600  |
| O  | -2.33687000 | -0.32370700 | 1.00743800  |
| Si | -3.87608200 | 0.02129100  | 0.42090700  |
| C  | -3.75963500 | 1.64086300  | -0.55475000 |
| C  | -4.27362100 | 1.80649200  | -1.85390100 |
| C  | -2.95101100 | 3.95040700  | -0.66445200 |
| C  | -3.48524700 | 4.09200200  | -1.94710200 |
| C  | -4.14417200 | 3.01558400  | -2.54126200 |
| C  | -4.43060500 | -1.41843800 | -0.67095900 |
| C  | -5.61343500 | -1.39952900 | -1.43654700 |
| C  | -6.00434900 | -2.50064000 | -2.20024600 |
| C  | -5.21920800 | -3.65482800 | -2.21522100 |
| C  | -4.04861600 | -3.70252600 | -1.45736200 |
| C  | -3.66279400 | -2.59914400 | -0.69345000 |
| C  | -4.96296900 | 0.14493200  | 1.99409200  |
| C  | -4.89474500 | -1.20453100 | 2.74323600  |
| C  | -4.44996200 | 1.26078600  | 2.92877900  |
| C  | -6.42706900 | 0.44396000  | 1.60827200  |
| H  | 1.36802000  | -0.81919300 | -0.66023700 |
| H  | -0.00695300 | -0.33697900 | 2.04037900  |
| H  | 0.48532500  | -4.03704300 | 1.68734800  |
| H  | 2.54828200  | -0.82664000 | 2.14742300  |
| H  | 1.51429300  | 1.40696800  | -1.53682200 |
| H  | 3.11843000  | 1.02176400  | -0.86794500 |
| H  | 4.44094800  | 2.70915000  | 0.23976700  |
| H  | 4.81368100  | 5.10627400  | 0.76768000  |
| H  | 2.96799100  | 6.74534100  | 0.46889100  |
| H  | 0.75452900  | 5.97640500  | -0.36085000 |
| H  | 0.38900300  | 3.58205100  | -0.88720700 |
| H  | 4.89919000  | -2.32793900 | 1.44103400  |
| H  | 4.92686200  | -0.68587800 | 2.11594500  |
| H  | 5.31514300  | -2.01906600 | -1.38548500 |
| H  | 7.29089700  | -1.54738000 | -2.81913200 |
| H  | 9.17694500  | -0.19115300 | -1.93132800 |
| H  | 9.07513600  | 0.69466300  | 0.39012100  |
| H  | 7.09926900  | 0.22544600  | 1.81090700  |
| H  | -2.65338600 | 2.65138400  | 1.01109800  |
| H  | -1.24275800 | -0.82996400 | -0.69514200 |
| H  | -0.92451200 | 0.79136300  | -0.02913700 |
| H  | -4.77059100 | 0.97727500  | -2.34874200 |
| H  | -2.43023500 | 4.78114800  | -0.19452200 |
| H  | -3.38290900 | 5.03311600  | -2.48134100 |
| H  | -4.55287800 | 3.11334300  | -3.54387100 |
| H  | -6.24870600 | -0.51667700 | -1.43805100 |



|   |             |             |             |
|---|-------------|-------------|-------------|
| H | -6.92197500 | -2.45773700 | -2.78164800 |
| H | -5.52072600 | -4.51265800 | -2.81080000 |
| H | -3.43517200 | -4.60003100 | -1.45879400 |
| H | -2.75595600 | -2.66032200 | -0.09757700 |
| H | -3.86861100 | -1.44720800 | 3.04077500  |
| H | -5.27163900 | -2.03156900 | 2.13076800  |
| H | -5.50753300 | -1.16110400 | 3.65539500  |
| H | -3.40498000 | 1.09935400  | 3.21679600  |
| H | -5.04956500 | 1.28283700  | 3.85032400  |
| H | -4.52849000 | 2.25131100  | 2.46635100  |
| H | -7.04708000 | 0.52346300  | 2.51271400  |
| H | -6.85796100 | -0.35065100 | 0.98815200  |
| H | -6.52278900 | 1.39136400  | 1.06302200  |
| N | 2.46872500  | -3.23799300 | -0.68672900 |
| N | 2.47142700  | -4.45201400 | -0.73670900 |
| N | 2.47459200  | -5.61210300 | -0.79136700 |
| H | 2.87586700  | -3.38359800 | 1.63210300  |

C-Int-*si*, UB3LYP/6-31G(d)

Total SCF energy in solvent acetonitrile:-2150.508408 a.u.

Thermal free energy correction in gas phase: 0.610986 a.u.

Gibbs free energy in solvent acetonitrile at 298K: -2149.897422 a.u.

Gibbs free energy in gas phase at 298K: -2149.861186 a.u.

UX3LYP/6-311+G(d,p)

Total SCF energy in solvent acetonitrile: -2150.12625 a.u.

Gibbs free energy in solvent acetonitrile at 298K: -2149.515264a.u.

Charge and Multiplicity: 0 2

Cartesian coordinates:

| ATOM | X           | Y           | Z           |
|------|-------------|-------------|-------------|
| C    | -1.29992400 | -0.77093900 | -0.26219800 |
| C    | 0.07458600  | -1.01313700 | -0.91452400 |
| O    | 0.41282500  | -2.41631400 | -0.91605200 |
| C    | -0.53858000 | -3.29900300 | -1.32303400 |
| C    | -1.94678900 | -3.12129300 | -0.86982300 |
| C    | -2.35345700 | -1.64025300 | -0.95853700 |
| O    | -1.62127000 | 0.60698900  | -0.40862300 |
| C    | -2.17043600 | 1.21400300  | 0.77421600  |
| C    | -2.47665000 | 2.66056800  | 0.48064400  |
| C    | -1.43630800 | 3.57995300  | 0.28842700  |
| C    | -1.71481100 | 4.91688800  | 0.01033700  |
| C    | -3.03952700 | 5.35445600  | -0.07408000 |
| C    | -4.08139800 | 4.44748000  | 0.11956400  |
| C    | -3.79973600 | 3.10686800  | 0.39284100  |
| O    | -3.63398200 | -1.45137500 | -0.37599000 |

|    |             |             |             |
|----|-------------|-------------|-------------|
| C  | -4.56303300 | -0.75393400 | -1.20725000 |
| C  | -5.86742500 | -0.55449500 | -0.47096900 |
| C  | -6.33034900 | -1.48959200 | 0.46259400  |
| C  | -7.56110600 | -1.30308000 | 1.09348500  |
| C  | -8.34709400 | -0.18824300 | 0.79513200  |
| C  | -7.89219900 | 0.74669400  | -0.13596400 |
| C  | -6.65703900 | 0.56564900  | -0.76045100 |
| C  | 3.07274800  | 2.78061700  | -0.14563300 |
| C  | 1.19954700  | -0.28270800 | -0.20152700 |
| O  | 2.37271300  | -0.33747900 | -0.99740300 |
| Si | 3.91034400  | 0.06195700  | -0.45161400 |
| C  | 3.77619100  | 1.71818900  | 0.46058000  |
| C  | 4.30834000  | 1.94778100  | 1.74221200  |
| C  | 2.92562300  | 4.01528200  | 0.48811000  |
| C  | 3.47782600  | 4.22028500  | 1.75451300  |
| C  | 4.16660600  | 3.18193700  | 2.38126000  |
| C  | 4.52165400  | -1.31520100 | 0.69030000  |
| C  | 5.72122600  | -1.23216500 | 1.42549800  |
| C  | 6.15804800  | -2.28696100 | 2.22858800  |
| C  | 5.40284500  | -3.45789000 | 2.31484100  |
| C  | 4.21620600  | -3.56829900 | 1.58919500  |
| C  | 3.78363800  | -2.51156100 | 0.78507400  |
| C  | 4.97030000  | 0.14955600  | -2.04635400 |
| C  | 4.91975900  | -1.22885400 | -2.74228200 |
| C  | 4.41776300  | 1.21691100  | -3.01446900 |
| C  | 6.43285300  | 0.49520600  | -1.69612600 |
| H  | -1.25744700 | -1.05184000 | 0.79850400  |
| H  | 0.03684400  | -0.66971900 | -1.95729800 |
| H  | -0.13202400 | -4.29703100 | -1.45191900 |
| H  | -2.61431700 | -3.72931200 | -1.49268800 |
| H  | -2.37539800 | -1.36191500 | -2.02182200 |
| H  | -1.43559700 | 1.13483500  | 1.59061700  |
| H  | -3.07584300 | 0.67857500  | 1.08140100  |
| H  | -0.40376200 | 3.24632400  | 0.36112300  |
| H  | -0.89935700 | 5.62083400  | -0.13480800 |
| H  | -3.25634000 | 6.39821000  | -0.28590400 |
| H  | -5.11398200 | 4.78140600  | 0.05961500  |
| H  | -4.61456100 | 2.40215500  | 0.54205900  |
| H  | -4.73414100 | -1.33683800 | -2.12871900 |
| H  | -4.14458700 | 0.21563800  | -1.50731700 |
| H  | -5.72242000 | -2.35557800 | 0.70282200  |
| H  | -7.90611700 | -2.03367300 | 1.82044000  |
| H  | -9.30549000 | -0.04704600 | 1.28768800  |
| H  | -8.49362900 | 1.62083400  | -0.37165300 |

|   |             |             |             |
|---|-------------|-------------|-------------|
| H | -6.30308700 | 1.30122500  | -1.48003700 |
| H | 2.62597800  | 2.64120500  | -1.12694000 |
| H | 1.35961600  | -0.74884800 | 0.78098200  |
| H | 0.89034400  | 0.75692700  | -0.04620100 |
| H | 4.83036500  | 1.14942100  | 2.26138700  |
| H | 2.38280400  | 4.81708000  | -0.00673500 |
| H | 3.36605200  | 5.18086100  | 2.25087900  |
| H | 4.58982800  | 3.32907900  | 3.37179500  |
| H | 6.33352500  | -0.33480400 | 1.37156400  |
| H | 7.08759900  | -2.19509000 | 2.78490200  |
| H | 5.74003300  | -4.28004800 | 2.94099600  |
| H | 3.62556300  | -4.47921300 | 1.64684000  |
| H | 2.86366500  | -2.62274500 | 0.21743500  |
| H | 3.89409100  | -1.50565300 | -3.00987700 |
| H | 5.32677800  | -2.02309700 | -2.10618100 |
| H | 5.51459400  | -1.20684400 | -3.66709800 |
| H | 3.37268000  | 1.02081400  | -3.27981900 |
| H | 5.00292200  | 1.21728700  | -3.94560300 |
| H | 4.48047000  | 2.22586800  | -2.59107300 |
| H | 7.03713300  | 0.55542900  | -2.61264500 |
| H | 6.89122400  | -0.26616100 | -1.05442900 |
| H | 6.51468500  | 1.46367900  | -1.18678700 |
| N | -2.07211500 | -3.58861200 | 0.56929100  |
| N | -3.17681600 | -4.04797900 | 0.86908000  |
| N | -4.14895400 | -4.52033500 | 1.24398600  |

P-Reactant, B3LYP/6-31G(d)

Total SCF energy in solvent acetonitrile: -1075.03455888 a.u.

Thermal free energy correction in gas phase: 0.301528 a.u.

Gibbs free energy in solvent acetonitrile at 298K: -1074.733031 a.u.

Gibbs free energy in gas phase at 298K: -1074.697487 a.u.

UX3LYP/6-311+G(d,p)

Total SCF energy in solvent acetonitrile: -1074.847466 a.u.

Gibbs free energy in solvent acetonitrile -1074.667199 a.u

Charge and Multiplicity: 0 1

Cartesian coordinates:

| ATOM | X          | Y          | Z           |
|------|------------|------------|-------------|
| C    | -0.5357820 | 1.42911300 | 0.10992500  |
| C    | -1.4612820 | 2.62043800 | -0.15818000 |
| O    | -0.8553720 | 3.85932300 | 0.22051300  |
| C    | 0.4463320  | 3.97823100 | -0.17932900 |
| C    | 1.2044450  | 2.98609300 | -0.66015800 |
| C    | 0.7349320  | 1.54726200 | -0.71951800 |
| O    | -1.2347340 | 0.23329200 | -0.21455700 |

|   |            |             |             |
|---|------------|-------------|-------------|
| C | -2.4195810 | 0.10452900  | 0.55268700  |
| C | -3.0854560 | -1.21094500 | 0.21885400  |
| C | -4.4772190 | -1.33795500 | 0.27272000  |
| C | -5.0788520 | -2.56976800 | 0.01147200  |
| C | -4.2960580 | -3.68234100 | -0.30067000 |
| C | -2.9063290 | -3.55773500 | -0.35198600 |
| C | -2.3016890 | -2.32789400 | -0.09213500 |
| O | 1.6990580  | 0.65291600  | -0.16560400 |
| C | -2.7524520 | 2.43193400  | 0.63498600  |
| O | -3.3193990 | 1.16924900  | 0.30171400  |
| H | -0.2505690 | 1.42483800  | 1.17465300  |
| H | -1.6918710 | 2.65107000  | -1.23235100 |
| H | 0.7957630  | 4.99920100  | -0.06102400 |
| H | 2.2228540  | 3.21158100  | -0.95893400 |
| H | 0.5085910  | 1.23448200  | -1.75159000 |
| H | -2.1366710 | 0.14233400  | 1.62280900  |
| H | -5.0825730 | -0.46973400 | 0.50903400  |
| H | -6.1614490 | -2.65843300 | 0.05013400  |
| H | -4.7661310 | -4.64116300 | -0.50335300 |
| H | -2.2902530 | -4.41902900 | -0.59676600 |
| H | -1.2227460 | -2.22435200 | -0.13845300 |
| H | -3.4951000 | 3.19346100  | 0.38499400  |
| H | -2.5317890 | 2.49327300  | 1.71288000  |
| C | 2.7060440  | 0.24709900  | -1.07906300 |
| H | 3.1975270  | 1.12960700  | -1.52419300 |
| H | 2.2590240  | -0.31999600 | -1.91183700 |
| C | 3.7352290  | -0.59826600 | -0.36362700 |
| C | 4.0527040  | -0.36053600 | 0.97864500  |
| C | 4.4193340  | -1.60385800 | -1.05552900 |
| C | 5.0383880  | -1.11550300 | 1.61478900  |
| H | 3.5114580  | 0.40838000  | 1.52002900  |
| C | 5.4117360  | -2.35362800 | -0.42265200 |
| H | 4.1720970  | -1.80530400 | -2.09594300 |
| C | 5.7237240  | -2.11156300 | 0.91609000  |
| H | 5.2714970  | -0.92540700 | 2.65940100  |
| H | 5.9333220  | -3.13254100 | -0.97281100 |
| H | 6.4915820  | -2.69875000 | 1.41285900  |

P-Ts-re, UB3LYP/6-31G(d)

Total SCF energy in solvent acetonitrile:-1239.174722 a.u.

Thermal free energy correction in gas phase: 0.314867 a.u.

Gibbs free energy in solvent acetonitrile at 298K: -1238.859855 a.u.

Gibbs free energy in gas phase at 298K: -1238.831055 a.u.

UX3LYP/6-311+G(d,p)

Total SCF energy in solvent acetonitrile: -1238.970956 a.u.

Gibbs free energy in solvent acetonitrile at 298K: -1238.656089 a.u.

Charge and Multiplicity: 0 2

Cartesian coordinates:

| ATOM | X           | Y           | Z           |
|------|-------------|-------------|-------------|
| C    | 0.49895800  | 0.84013300  | -0.66849500 |
| C    | 1.15171800  | 2.22020300  | -0.78688900 |
| O    | 0.28411300  | 3.12601200  | -1.49823200 |
| C    | -1.00639000 | 3.08276400  | -1.12329100 |
| C    | -1.49914600 | 2.23473900  | -0.13150100 |
| C    | -0.77572100 | 0.91526200  | 0.16366200  |
| O    | 1.42329700  | -0.05365000 | -0.06620400 |
| C    | 2.62777900  | -0.15322400 | -0.81647900 |
| C    | 3.55155100  | -1.11545900 | -0.11958700 |
| C    | 3.95347000  | -2.29359000 | -0.75139000 |
| C    | 4.80932600  | -3.18495900 | -0.10083600 |
| C    | 5.26502100  | -2.89801600 | 1.18581500  |
| C    | 4.86381800  | -1.71904600 | 1.82121900  |
| C    | 4.01006500  | -0.83019500 | 1.17192800  |
| O    | -1.59154200 | -0.18885600 | -0.19504300 |
| C    | -2.46774600 | -0.62500000 | 0.84141300  |
| C    | -3.37856100 | -1.70890100 | 0.31434000  |
| C    | -3.85371700 | -1.67333200 | -1.00199800 |
| C    | -4.73259700 | -2.65388900 | -1.46198400 |
| C    | -5.15370000 | -3.67743400 | -0.61030400 |
| C    | -4.68366600 | -3.71894600 | 0.70304100  |
| C    | -3.79690000 | -2.74258900 | 1.15930700  |
| C    | 2.46299900  | 2.08489400  | -1.55566800 |
| O    | 3.27158800  | 1.10895600  | -0.91010000 |
| H    | 0.23144700  | 0.48852100  | -1.67933500 |
| H    | 1.33230800  | 2.63031600  | 0.21309100  |
| H    | -1.59572700 | 3.86094400  | -1.59604300 |
| H    | -2.58155700 | 2.19272500  | -0.05891500 |
| H    | -0.50721000 | 0.87137600  | 1.22587300  |
| H    | 2.37887900  | -0.50199900 | -1.83463500 |
| H    | 3.59680300  | -2.51700400 | -1.75415300 |
| H    | 5.11792100  | -4.09999800 | -0.59892200 |
| H    | 5.93128800  | -3.58997700 | 1.69416100  |
| H    | 5.21790700  | -1.49381000 | 2.82360400  |
| H    | 3.69463400  | 0.08790200  | 1.65719700  |
| H    | -3.06687200 | 0.22408300  | 1.21116900  |
| H    | -1.88117200 | -0.99644700 | 1.69522200  |
| H    | -3.51730000 | -0.88297500 | -1.66539800 |
| H    | -5.08946200 | -2.61871300 | -2.48813500 |

|   |             |             |             |
|---|-------------|-------------|-------------|
| H | -5.83911300 | -4.44038200 | -0.96966600 |
| H | -4.99851200 | -4.51636200 | 1.37098700  |
| H | -3.42442100 | -2.78668500 | 2.18056200  |
| H | 3.02969100  | 3.01904500  | -1.56194200 |
| H | 2.24823200  | 1.79488600  | -2.59711700 |
| N | -1.19226100 | 3.13277600  | 1.59900600  |
| N | -1.84258700 | 4.16012800  | 1.65087900  |
| N | -2.45897700 | 5.14057800  | 1.70657400  |

P-Int-re, UB3LYP/6-31G(d)

Total SCF energy in solvent acetonitrile:-1239.182521 a.u.

Thermal free energy correction in gas phase: 0.316846 a.u.

Gibbs free energy in solvent acetonitrile at 298K: -1238.865675 a.u.

Gibbs free energy in gas phase at 298K: -1238.837688 a.u.

UX3LYP/6-311+G(d,p)

Total SCF energy in solvent acetonitrile: -1238.967587 a.u.

Gibbs free energy in solvent acetonitrile at 298K: -1238.650741 a.u.

Charge and Multiplicity: 0 2

Cartesian coordinates:

| ATOM | X           | Y           | Z           |
|------|-------------|-------------|-------------|
| C    | 0.49384600  | 0.80416400  | -0.60290500 |
| C    | 1.14603500  | 2.17860300  | -0.78234600 |
| O    | 0.25976700  | 3.06003000  | -1.48519300 |
| C    | -1.04946600 | 2.97041300  | -1.11501200 |
| C    | -1.43321700 | 2.27469500  | 0.13488000  |
| C    | -0.74580300 | 0.88242900  | 0.28457600  |
| O    | 1.43833500  | -0.08971700 | -0.02775200 |
| C    | 2.60756700  | -0.21077800 | -0.82924700 |
| C    | 3.55155500  | -1.17153400 | -0.15627100 |
| C    | 3.83094500  | -2.41093500 | -0.73488400 |
| C    | 4.69676600  | -3.30519500 | -0.10171300 |
| C    | 5.28654100  | -2.95959800 | 1.11414500  |
| C    | 5.00869400  | -1.71915700 | 1.69610700  |
| C    | 4.14372200  | -0.82813200 | 1.06467300  |
| O    | -1.61257200 | -0.16660100 | -0.10761600 |
| C    | -2.48618700 | -0.61853300 | 0.92169300  |
| C    | -3.45909800 | -1.62828500 | 0.35856900  |
| C    | -3.94947800 | -1.50477100 | -0.94675800 |
| C    | -4.88429900 | -2.41591800 | -1.43840500 |
| C    | -5.34592100 | -3.45662600 | -0.62966100 |
| C    | -4.86059400 | -3.58560700 | 0.67246100  |
| C    | -3.91853800 | -2.67879600 | 1.16025600  |
| C    | 2.42472800  | 2.01222600  | -1.60059400 |
| O    | 3.25596000  | 1.04195000  | -0.97337500 |

|   |             |             |             |
|---|-------------|-------------|-------------|
| H | 0.17928700  | 0.44017200  | -1.59524900 |
| H | 1.38111200  | 2.60658100  | 0.19993400  |
| H | -1.66373200 | 3.73251500  | -1.58060700 |
| H | -2.51958900 | 2.13566600  | 0.14333700  |
| H | -0.43447300 | 0.76225500  | 1.33029500  |
| H | 2.30983500  | -0.57583300 | -1.82865500 |
| H | 3.37083900  | -2.67959700 | -1.68296000 |
| H | 4.90980200  | -4.26769400 | -0.55881800 |
| H | 5.96191900  | -3.65312900 | 1.60821300  |
| H | 5.46787900  | -1.44761700 | 2.64291700  |
| H | 3.92504400  | 0.13844400  | 1.50699000  |
| H | -3.03943500 | 0.23481300  | 1.35035000  |
| H | -1.90120200 | -1.06314400 | 1.74130200  |
| H | -3.58066800 | -0.70186000 | -1.57700100 |
| H | -5.25265200 | -2.31323200 | -2.45590900 |
| H | -6.07462100 | -4.16551800 | -1.01374400 |
| H | -5.20694800 | -4.39750600 | 1.30654800  |
| H | -3.53460700 | -2.79123400 | 2.17202100  |
| H | 2.99814300  | 2.94093300  | -1.65191000 |
| H | 2.16243600  | 1.70305700  | -2.62530700 |
| N | -1.05055400 | 3.04828400  | 1.41064300  |
| N | -1.57788100 | 4.15807100  | 1.52396200  |
| N | -2.01971700 | 5.19716800  | 1.70858800  |

P-Ts-si, UB3LYP/6-31G(d)

Total SCF energy in solvent acetonitrile:-1239.173461 a.u.

Thermal free energy correction in gas phase: 0.318355 a.u.

Gibbs free energy in solvent acetonitrile at 298K: -1238.855106 a.u.

Gibbs free energy in gas phase at 298K: -1238.825544 a.u.

UX3LYP/6-311+G(d,p)

Total SCF energy in solvent acetonitrile: -1238.975708 a.u.

Gibbs free energy in solvent acetonitrile at 298K: -1238.657353 a.u.

Charge and Multiplicity: 0 2

Cartesian coordinates:

| ATOM | X           | Y           | Z           |
|------|-------------|-------------|-------------|
| C    | 0.53842600  | -1.44921500 | -0.01296100 |
| C    | 1.34403800  | -2.64451800 | -0.53781000 |
| O    | 0.62577800  | -3.88974300 | -0.45394900 |
| C    | -0.68638300 | -3.83973000 | -0.75108200 |
| C    | -1.45397300 | -2.67747000 | -0.71202700 |
| C    | -0.76642900 | -1.32437100 | -0.79858300 |
| O    | 1.35883300  | -0.29509900 | -0.16938900 |
| C    | 2.55880100  | -0.40783300 | 0.59639500  |
| C    | 3.35512000  | 0.85760900  | 0.41845900  |

|   |             |             |             |
|---|-------------|-------------|-------------|
| C | 4.05119600  | 1.09150800  | -0.77290900 |
| C | 4.75619100  | 2.28085300  | -0.94733800 |
| C | 4.76769100  | 3.24523600  | 0.06427000  |
| C | 4.07363000  | 3.01528600  | 1.25251200  |
| C | 3.36952800  | 1.82256200  | 1.42814900  |
| O | -1.64014700 | -0.32607100 | -0.32947600 |
| C | -1.42454300 | 0.97493200  | -0.87632600 |
| C | -2.56258100 | 1.89208100  | -0.48804900 |
| C | -3.80996000 | 1.39771000  | -0.09305400 |
| C | -4.84859600 | 2.27865000  | 0.21577000  |
| C | -4.65721200 | 3.65781000  | 0.12540400  |
| C | -3.41305700 | 4.15626300  | -0.26727600 |
| C | -2.37217100 | 3.27761700  | -0.56540900 |
| C | 2.63819300  | -2.75007900 | 0.26501200  |
| O | 3.33414900  | -1.51142200 | 0.16149600  |
| H | 0.28619900  | -1.59806700 | 1.04686000  |
| H | 1.58923100  | -2.46637700 | -1.59237800 |
| H | -1.12320200 | -4.82756100 | -0.84153500 |
| H | -2.44549100 | -2.73681800 | -1.15183100 |
| H | -0.51831000 | -1.12707600 | -1.85692700 |
| H | 4.04295100  | 0.33445600  | -1.55028800 |
| H | 5.29829100  | 2.45684000  | -1.87261300 |
| H | 5.31856400  | 4.17181400  | -0.07378500 |
| H | 4.08114100  | 3.76044800  | 2.04320500  |
| H | 2.82782400  | 1.64282100  | 2.35382500  |
| H | -1.36304000 | 0.89717600  | -1.97645100 |
| H | -0.46676500 | 1.38099700  | -0.52986400 |
| H | -3.96253500 | 0.32732300  | -0.00853200 |
| H | -5.81011100 | 1.88092800  | 0.52989200  |
| H | -5.46840300 | 4.34034300  | 0.36507500  |
| H | -3.24975900 | 5.22896800  | -0.33269600 |
| H | -1.40113700 | 3.67182800  | -0.85967200 |
| H | 3.30129600  | -3.52255200 | -0.13184500 |
| H | 2.40519900  | -2.98749700 | 1.31481200  |
| N | -2.05239400 | -2.65864800 | 1.19440700  |
| N | -3.24511700 | -2.43251500 | 1.16588600  |
| N | -4.38762400 | -2.22581600 | 1.14591800  |
| H | 2.27763600  | -0.55985500 | 1.65294000  |

P-Int-si, UB3LYP/6-31G(d)

Total SCF energy in solvent acetonitrile:-1239.182521 a.u.

Thermal free energy correction in gas phase: 0.319859 a.u.

Gibbs free energy in solvent acetonitrile at 298K: -1238.862662 a.u.

Gibbs free energy in gas phase at 298K: -1238.838049 a.u.



UX3LYP/6-311+G(d,p)

Total SCF energy in solvent acetonitrile: -1238.976771 a.u.

Gibbs free energy in solvent acetonitrile at 298K: -1238.656912 a.u.

Charge and Multiplicity: 0 2

Cartesian coordinates:

| ATOM | X           | Y           | Z           |
|------|-------------|-------------|-------------|
| C    | 0.51762300  | -1.47912200 | 0.03926200  |
| C    | 1.32504300  | -2.67821700 | -0.47425700 |
| O    | 0.61344200  | -3.90996000 | -0.32890300 |
| C    | -0.66017400 | -3.89506000 | -0.82195600 |
| C    | -1.54369700 | -2.71691000 | -0.56234900 |
| C    | -0.79474700 | -1.37451700 | -0.73354300 |
| O    | 1.32027000  | -0.31329200 | -0.13362800 |
| C    | 2.53422700  | -0.40830200 | 0.61139700  |
| C    | 3.31286400  | 0.86517700  | 0.40902000  |
| C    | 3.99300900  | 1.09198500  | -0.79288600 |
| C    | 4.68186100  | 2.28719500  | -0.99055100 |
| C    | 4.69311600  | 3.26486900  | 0.00823500  |
| C    | 4.01483700  | 3.04219600  | 1.20695300  |
| C    | 3.32694100  | 1.84358000  | 1.40565900  |
| O    | -1.64624600 | -0.34310600 | -0.28653200 |
| C    | -1.42069400 | 0.93513800  | -0.88427900 |
| C    | -2.51834300 | 1.89511100  | -0.48540800 |
| C    | -3.78570000 | 1.44869000  | -0.09687400 |
| C    | -4.78919700 | 2.36604100  | 0.22007700  |
| C    | -4.54241000 | 3.73741100  | 0.14325700  |
| C    | -3.27898600 | 4.18915600  | -0.24357200 |
| C    | -2.27317400 | 3.27251100  | -0.54891000 |
| C    | 2.63540700  | -2.75195900 | 0.30475700  |
| O    | 3.31476700  | -1.50507100 | 0.17520600  |
| H    | 0.28370800  | -1.61942000 | 1.10597600  |
| H    | 1.54822100  | -2.51660700 | -1.53769100 |
| H    | -1.09331800 | -4.88981400 | -0.84436700 |
| H    | -2.39377400 | -2.74260400 | -1.25429500 |
| H    | -0.56558000 | -1.24525500 | -1.80400500 |
| H    | 3.98528800  | 0.32431300  | -1.55974000 |
| H    | 5.21178000  | 2.45732500  | -1.92398800 |
| H    | 5.23160400  | 4.19591100  | -0.14779700 |
| H    | 4.02238200  | 3.79756200  | 1.98798200  |
| H    | 2.79794500  | 1.66929300  | 2.33974100  |
| H    | -1.40418000 | 0.81801600  | -1.98227100 |
| H    | -0.44098500 | 1.32548700  | -0.58734600 |
| H    | -3.97954500 | 0.38424800  | -0.02468600 |
| H    | -5.76657600 | 2.00468400  | 0.52928200  |

|   |             |             |             |
|---|-------------|-------------|-------------|
| H | -5.32594100 | 4.44940300  | 0.38896300  |
| H | -3.07278900 | 5.25500500  | -0.29815500 |
| H | -1.28663900 | 3.63015500  | -0.83755300 |
| H | 3.30202700  | -3.52024300 | -0.09408700 |
| H | 2.42677800  | -2.97900400 | 1.36216700  |
| N | -2.06947500 | -2.81717300 | 0.85487900  |
| N | -3.22545500 | -2.41299200 | 1.00804400  |
| N | -4.29610600 | -2.09614600 | 1.25337100  |
| H | 2.27214900  | -0.55266800 | 1.67448200  |

## 9. Spectrum of the compounds

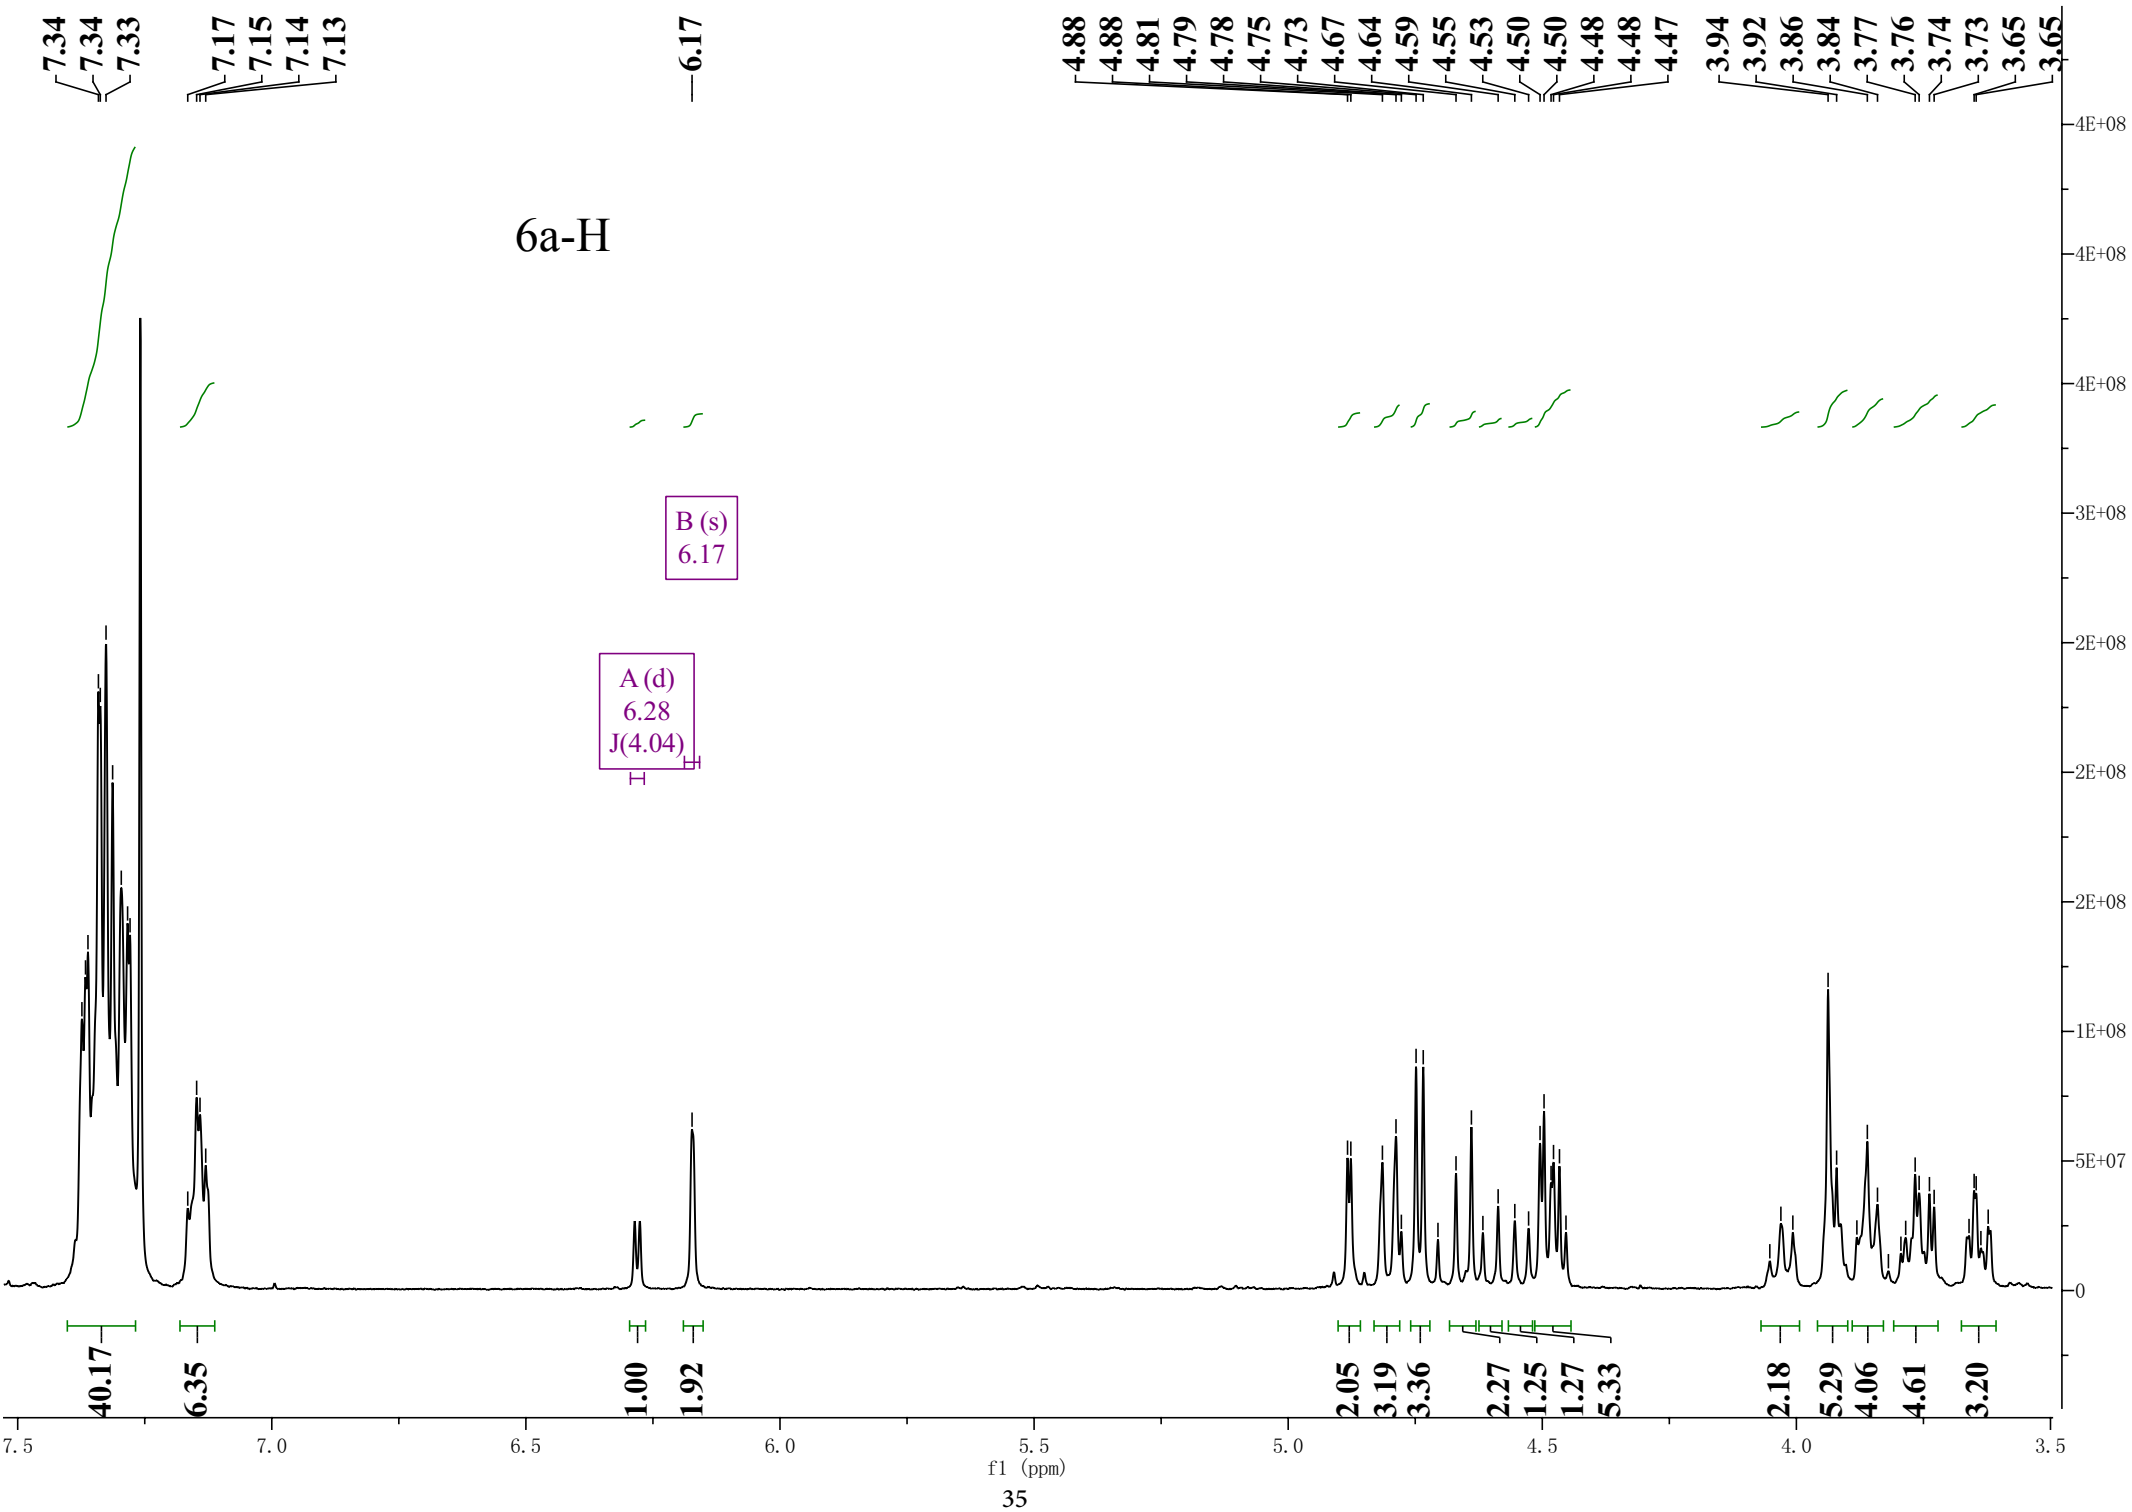

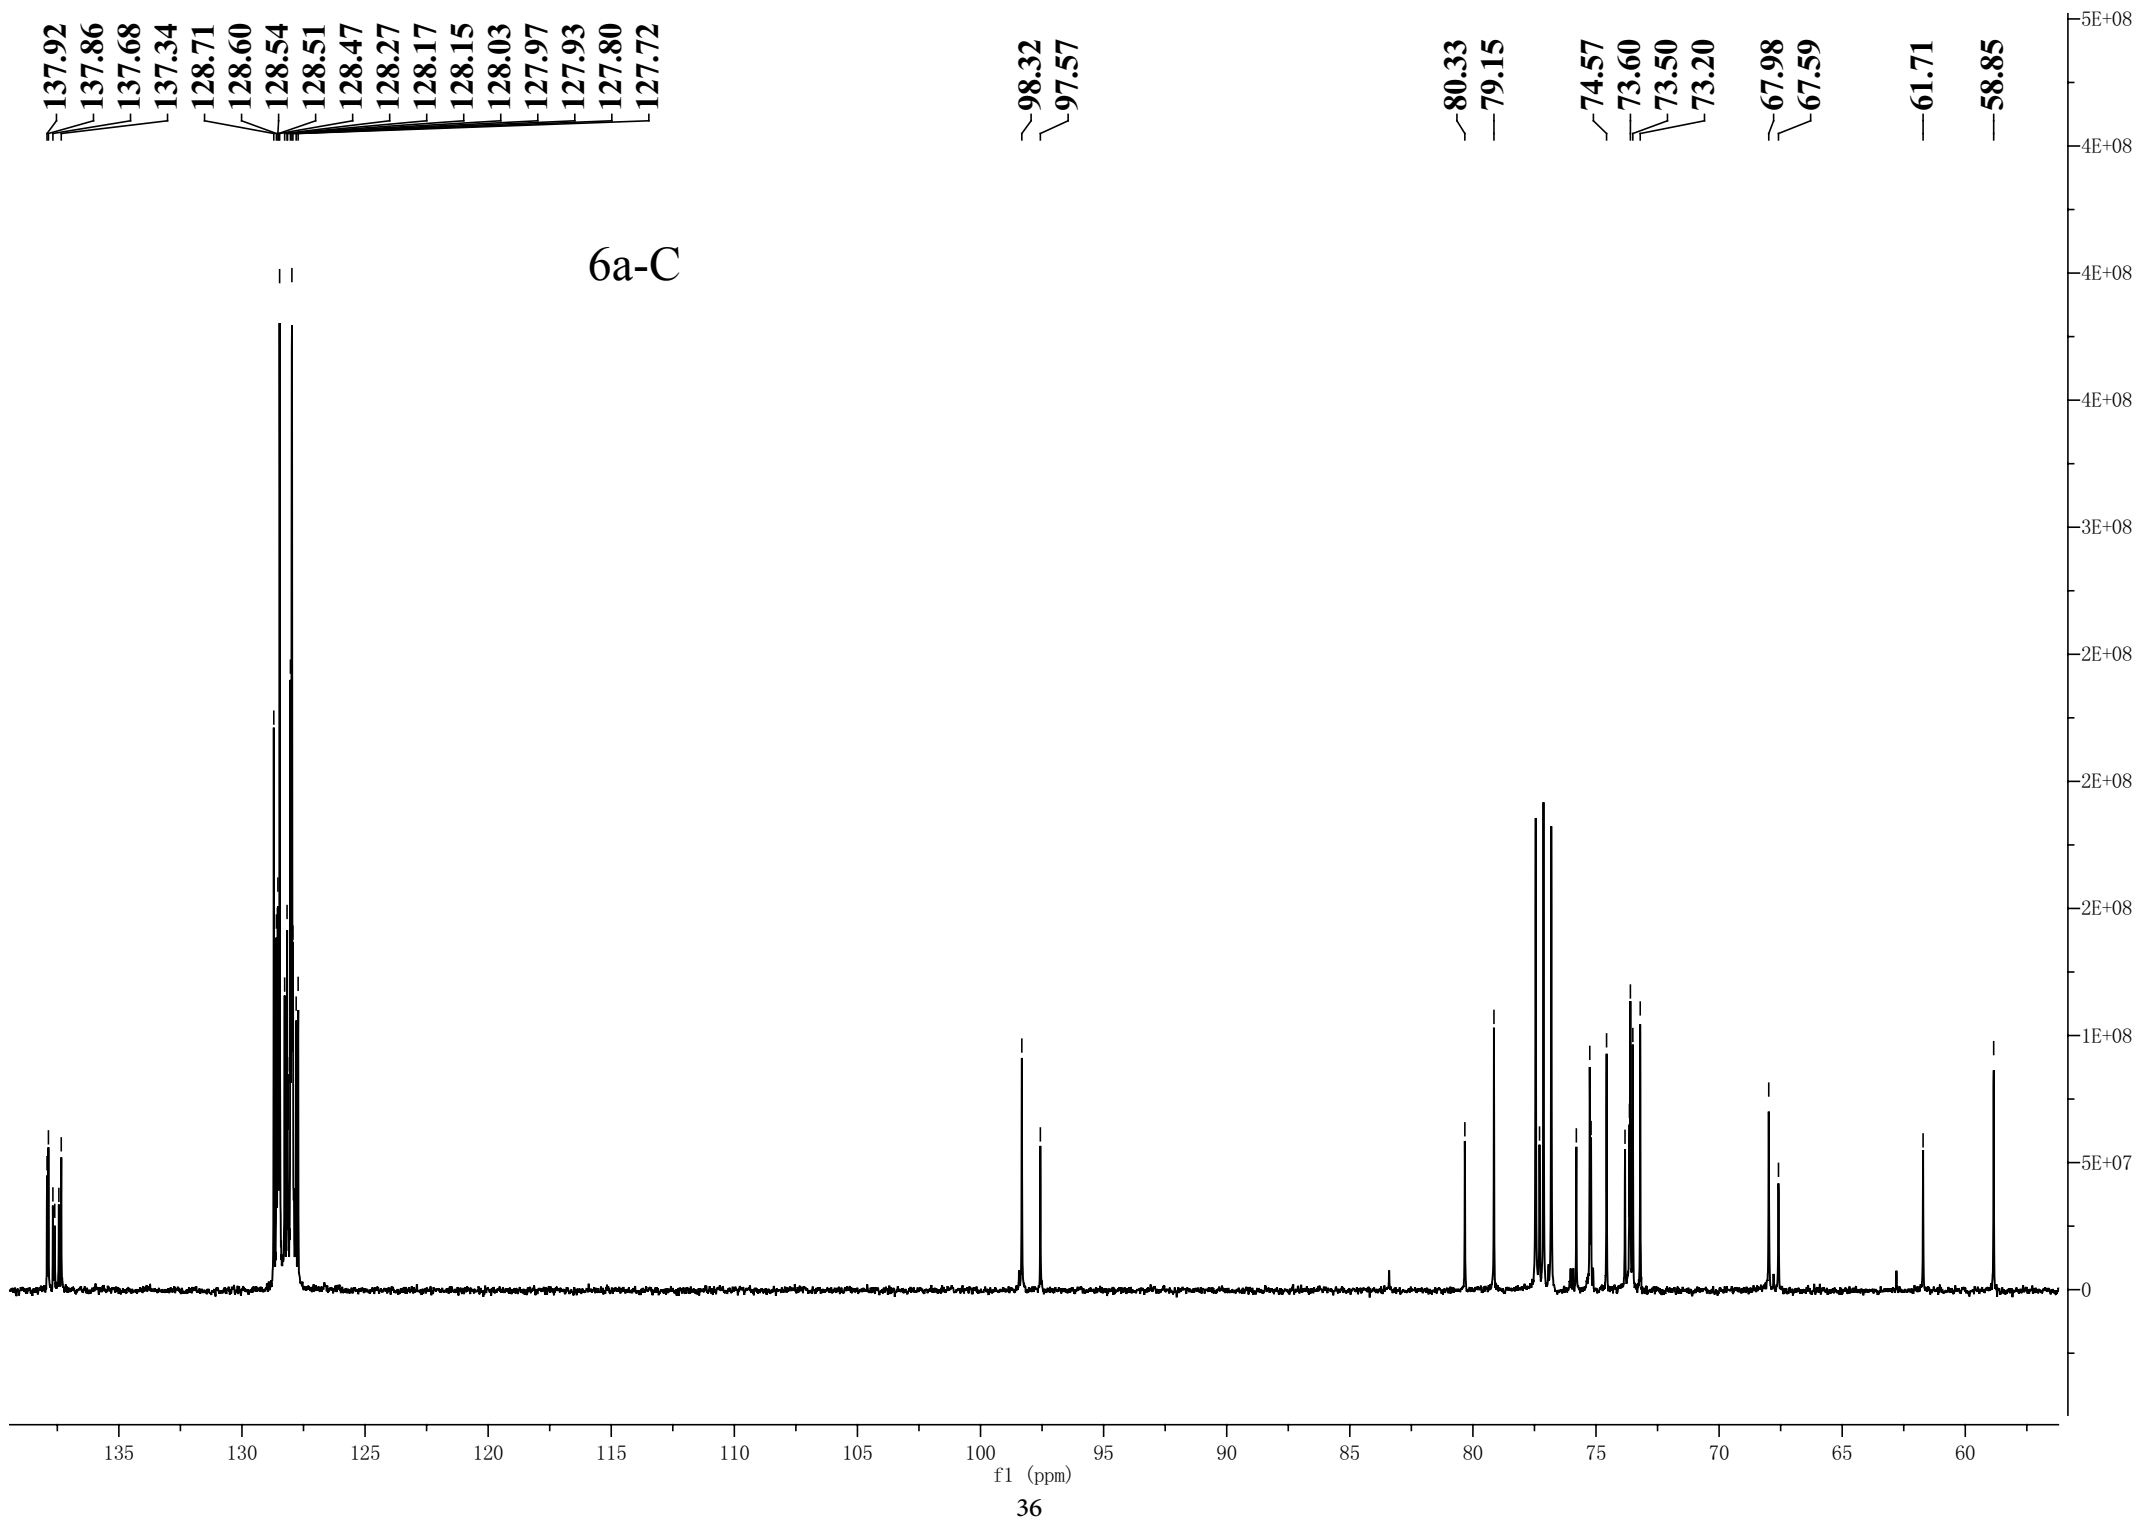

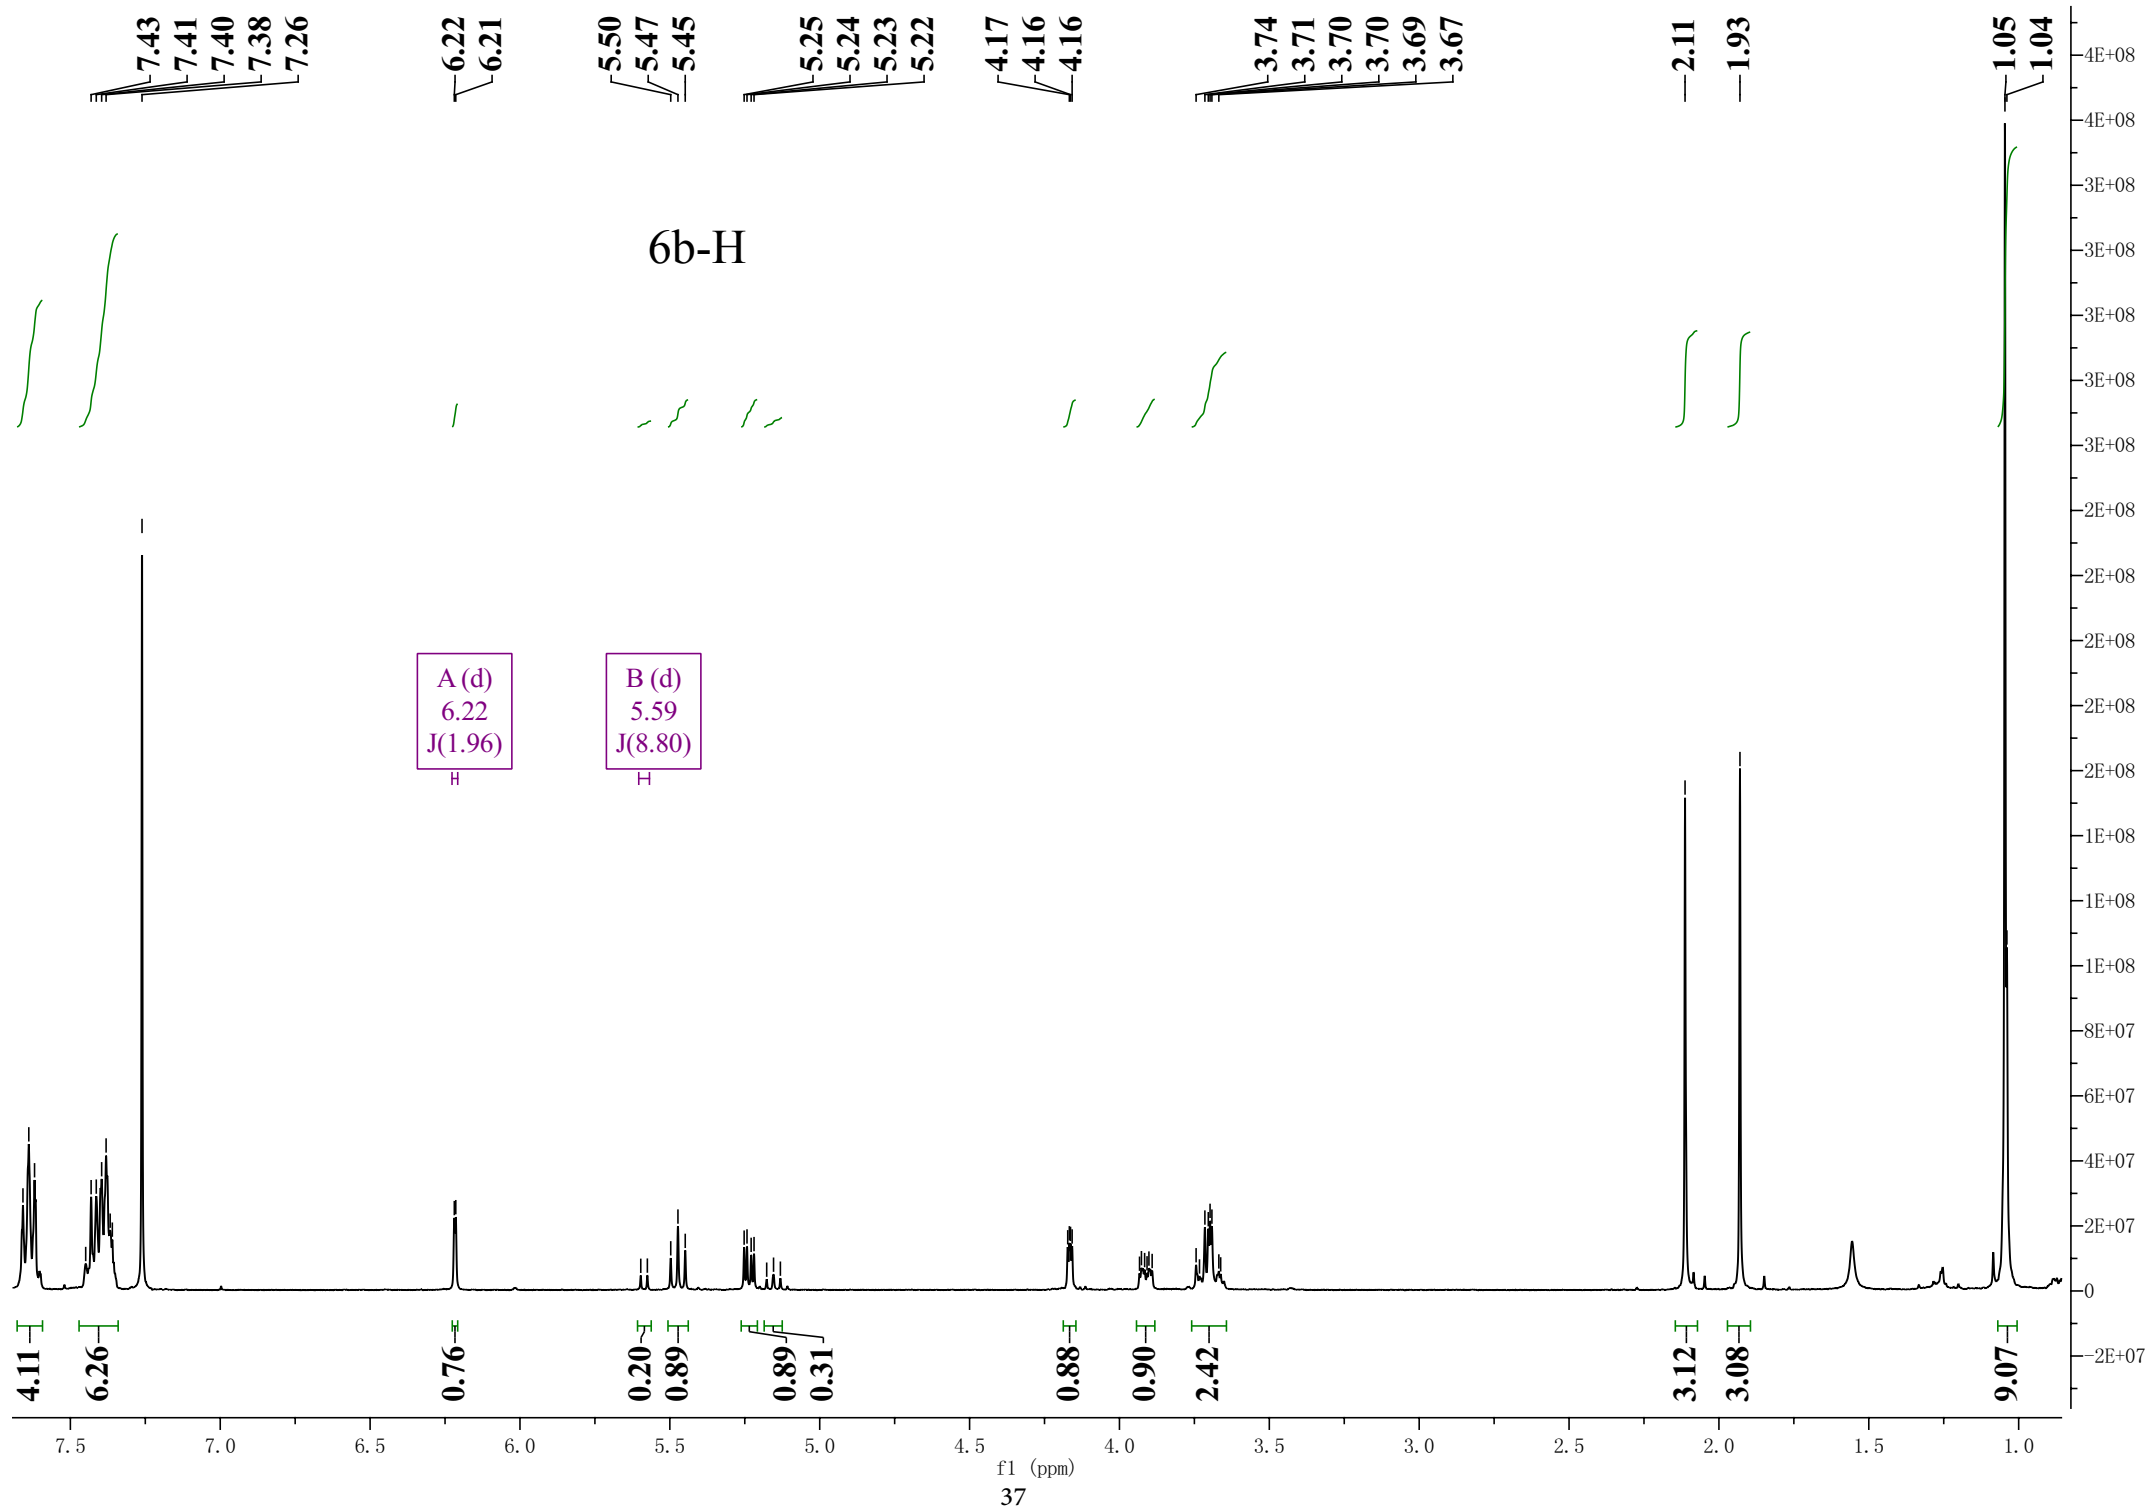

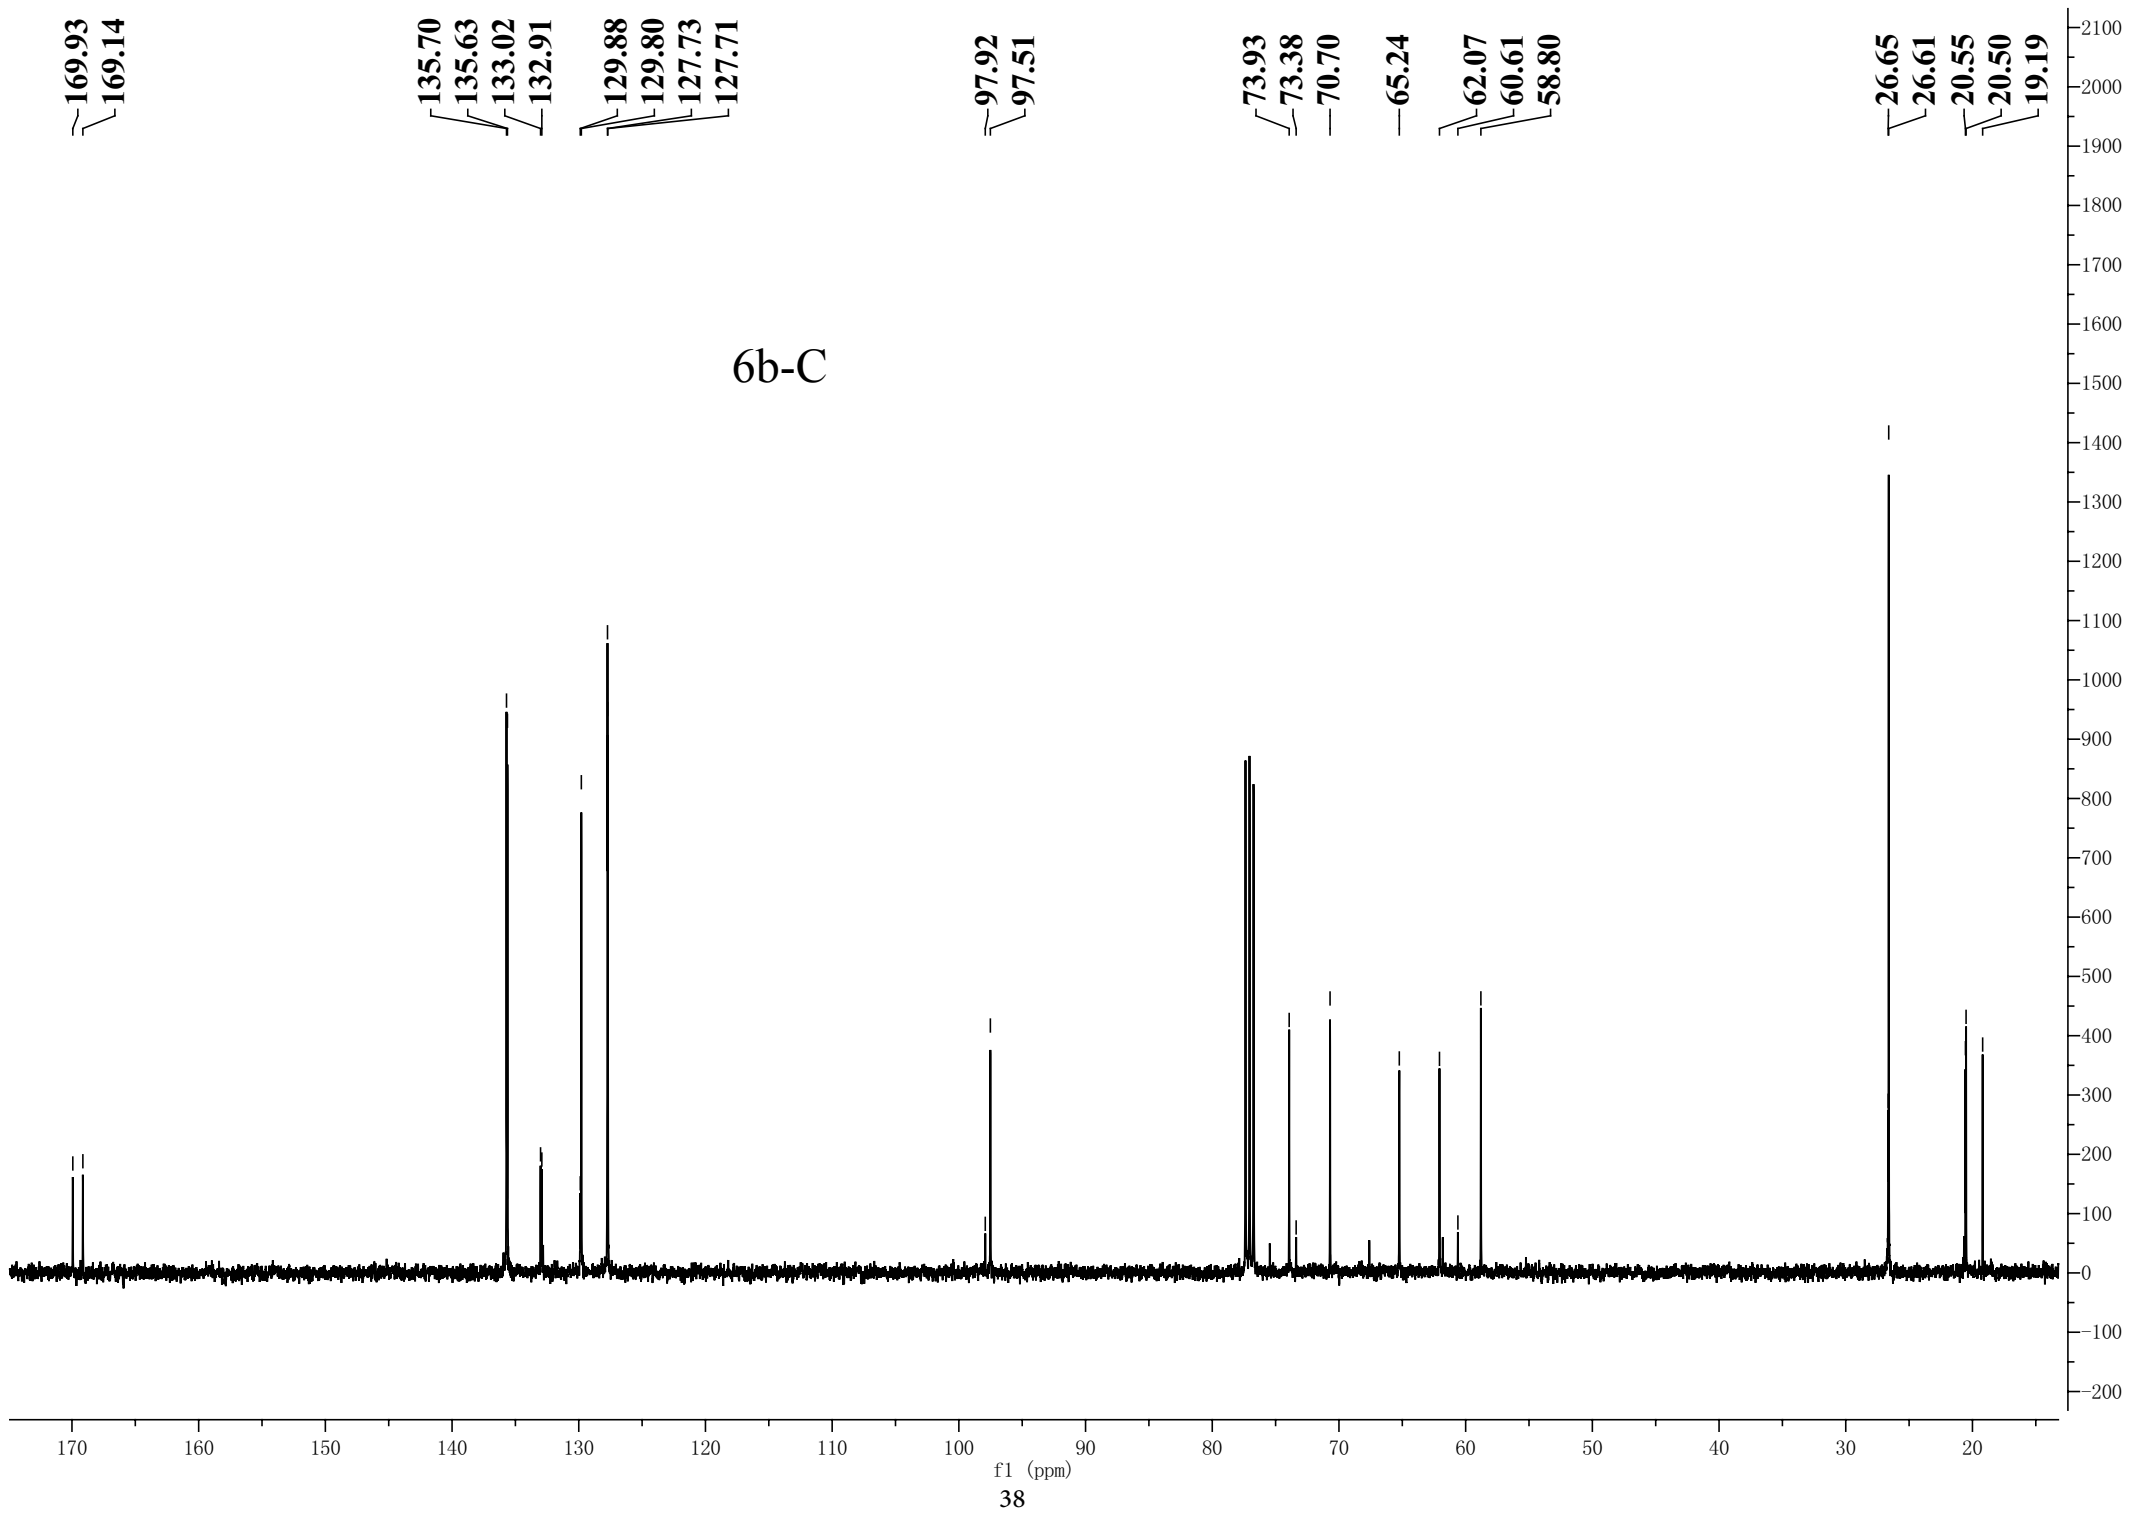

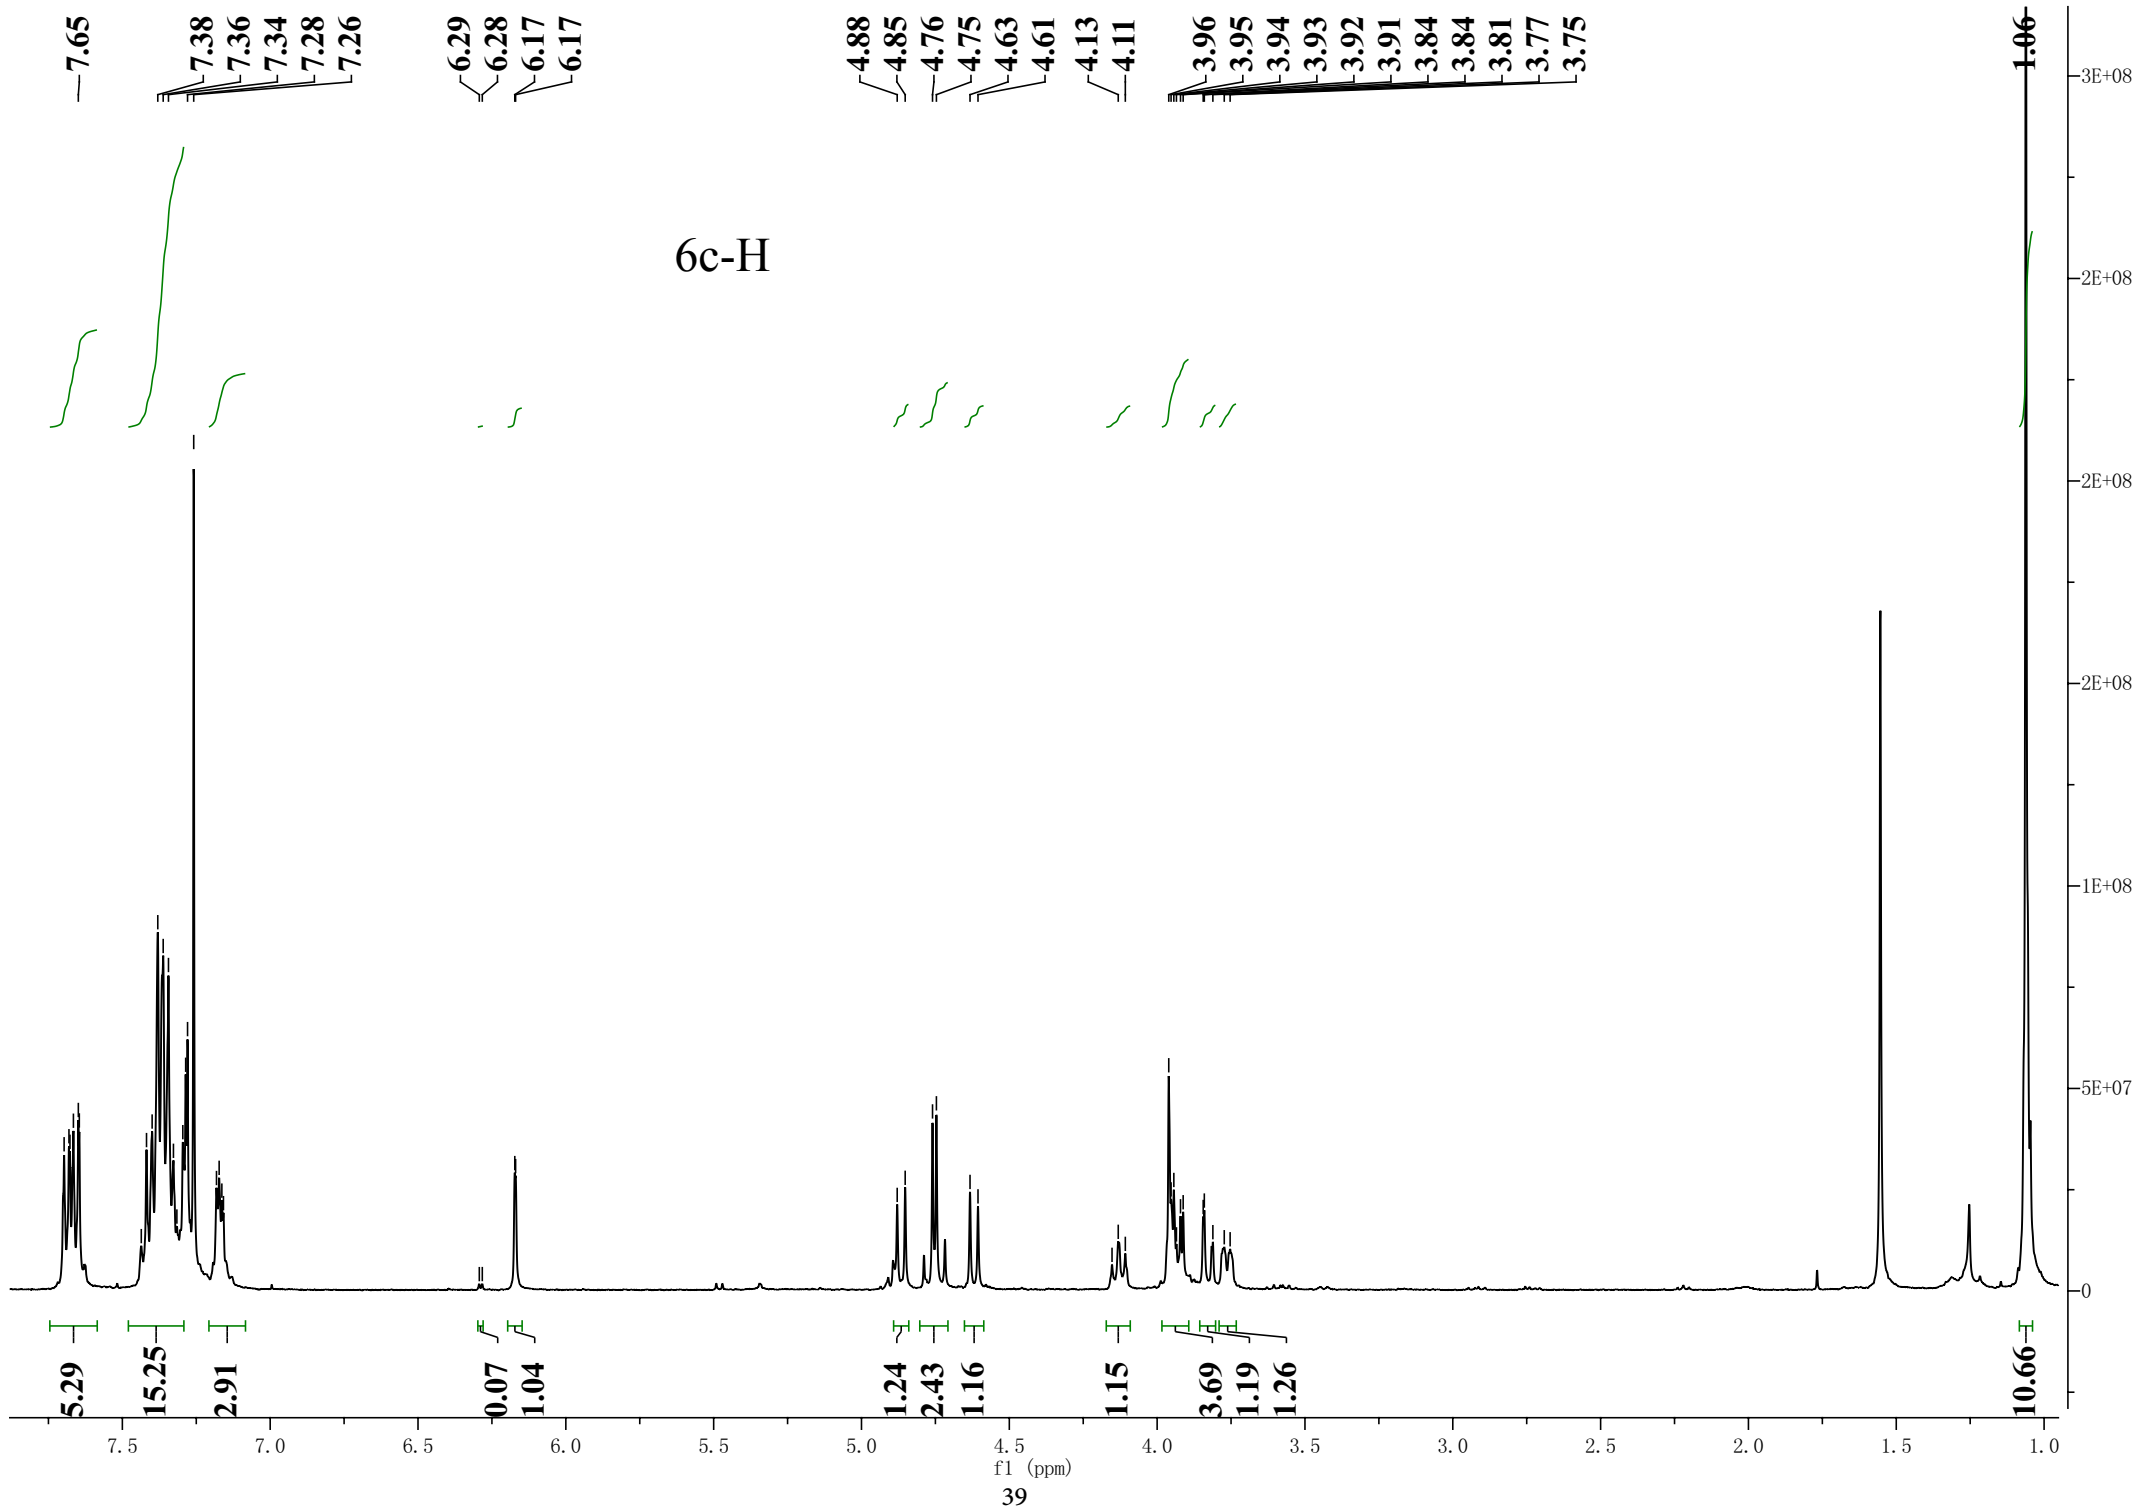



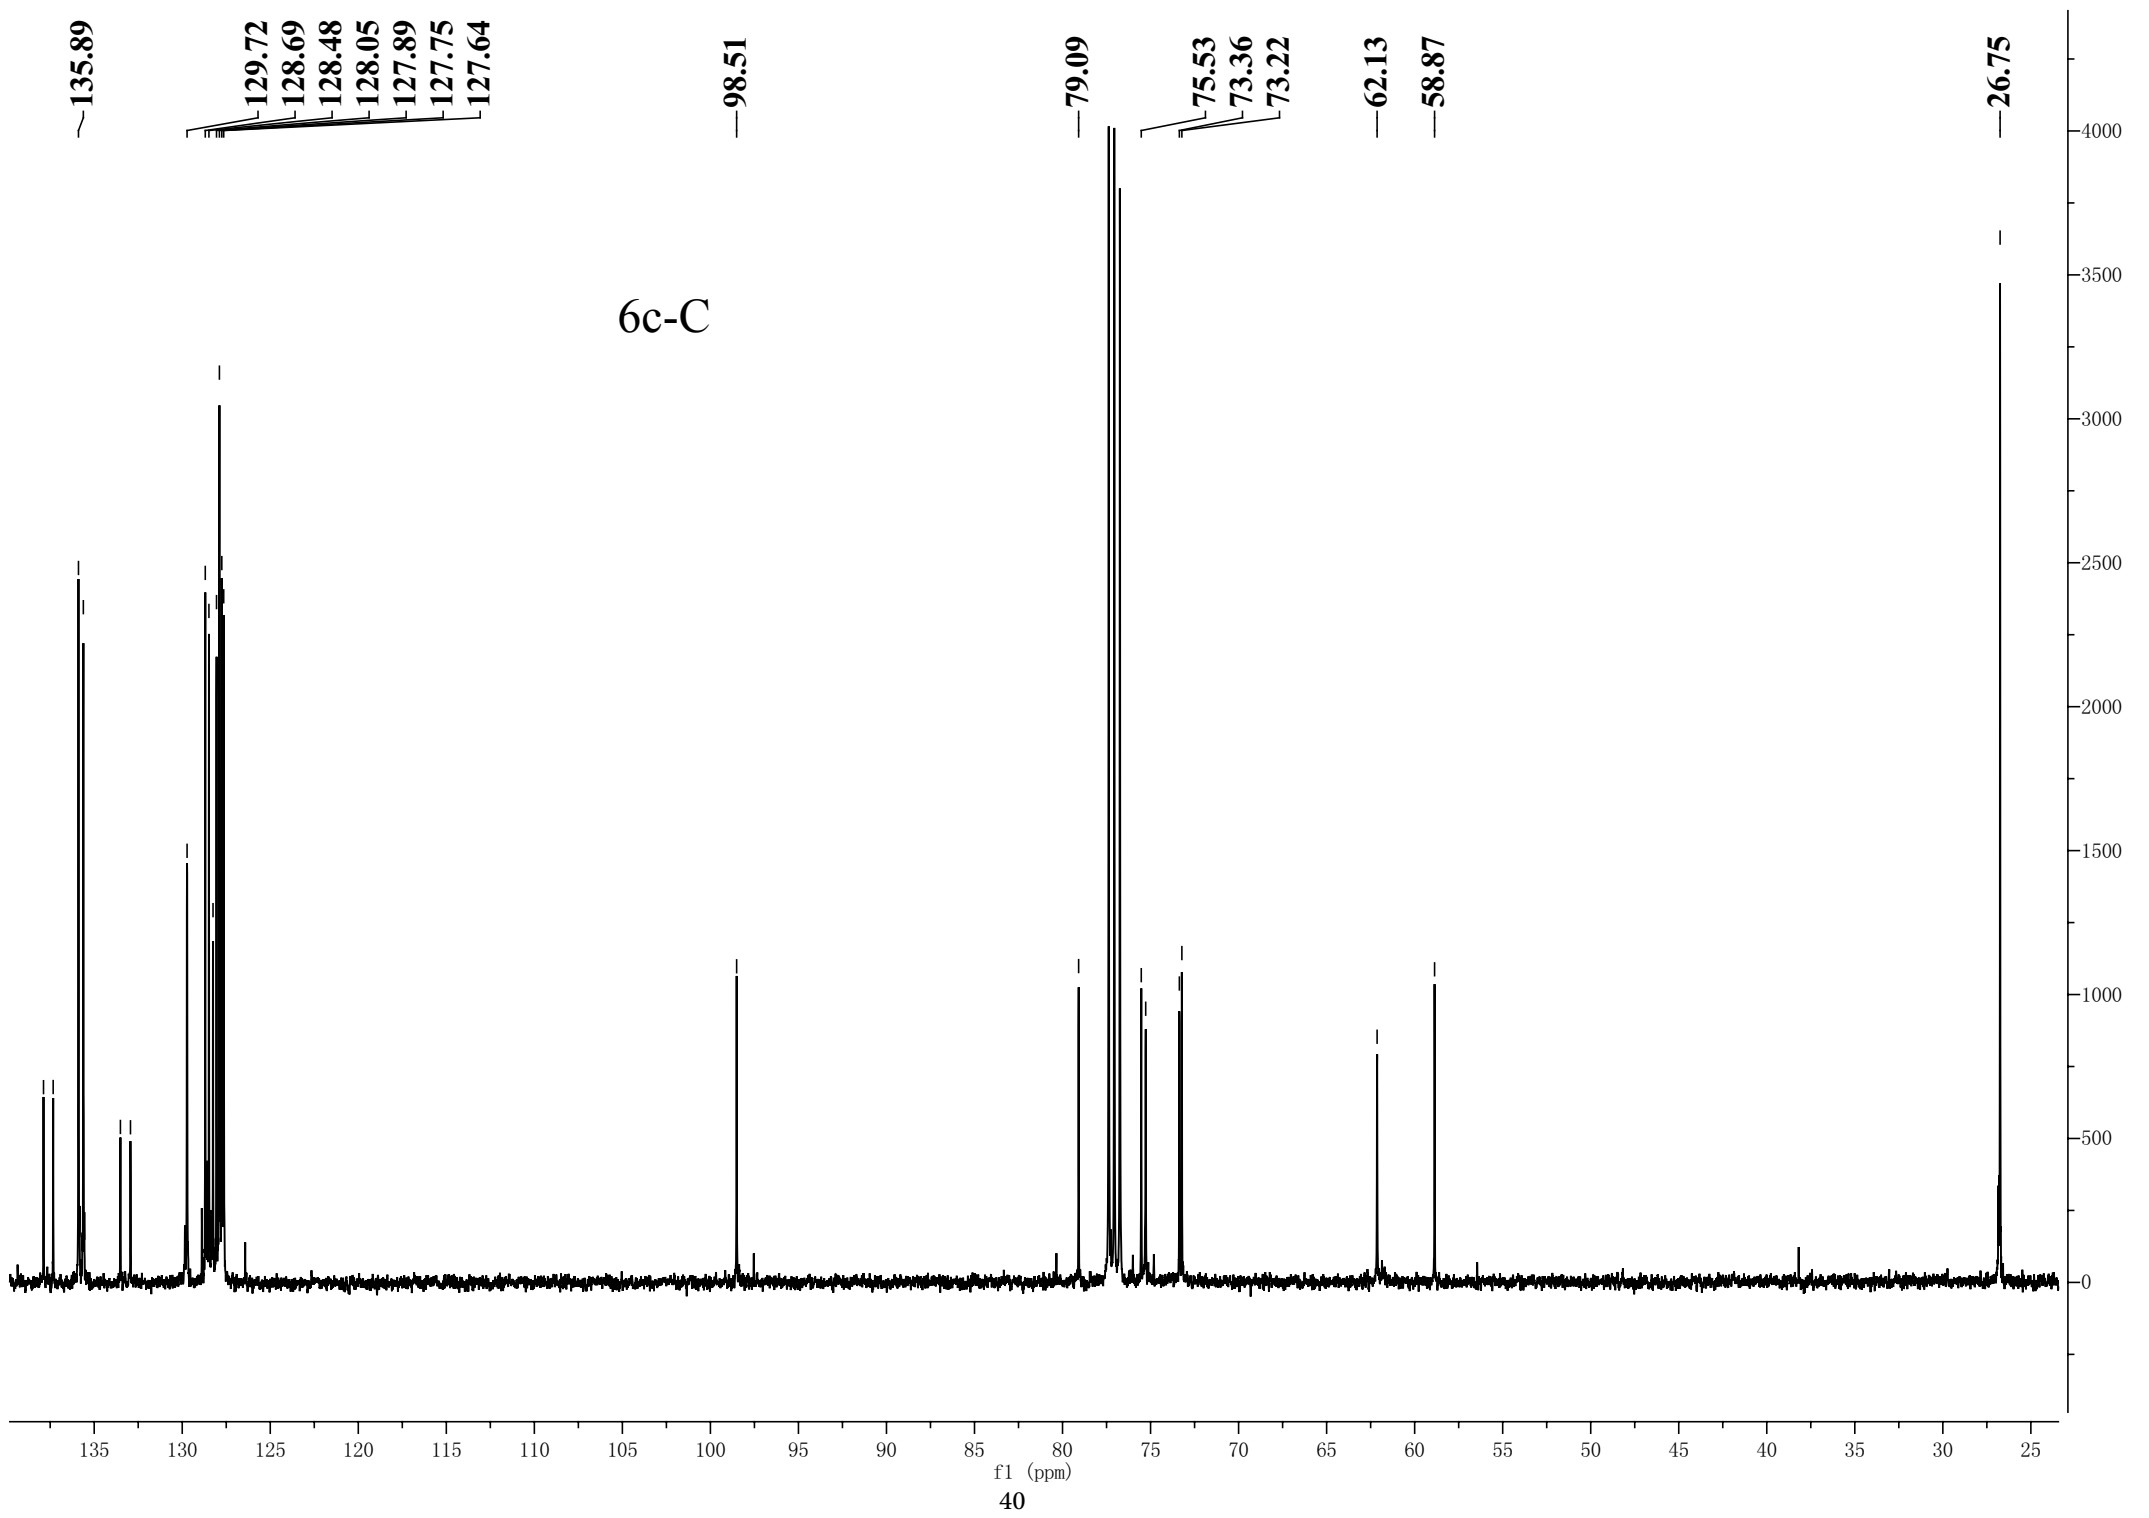

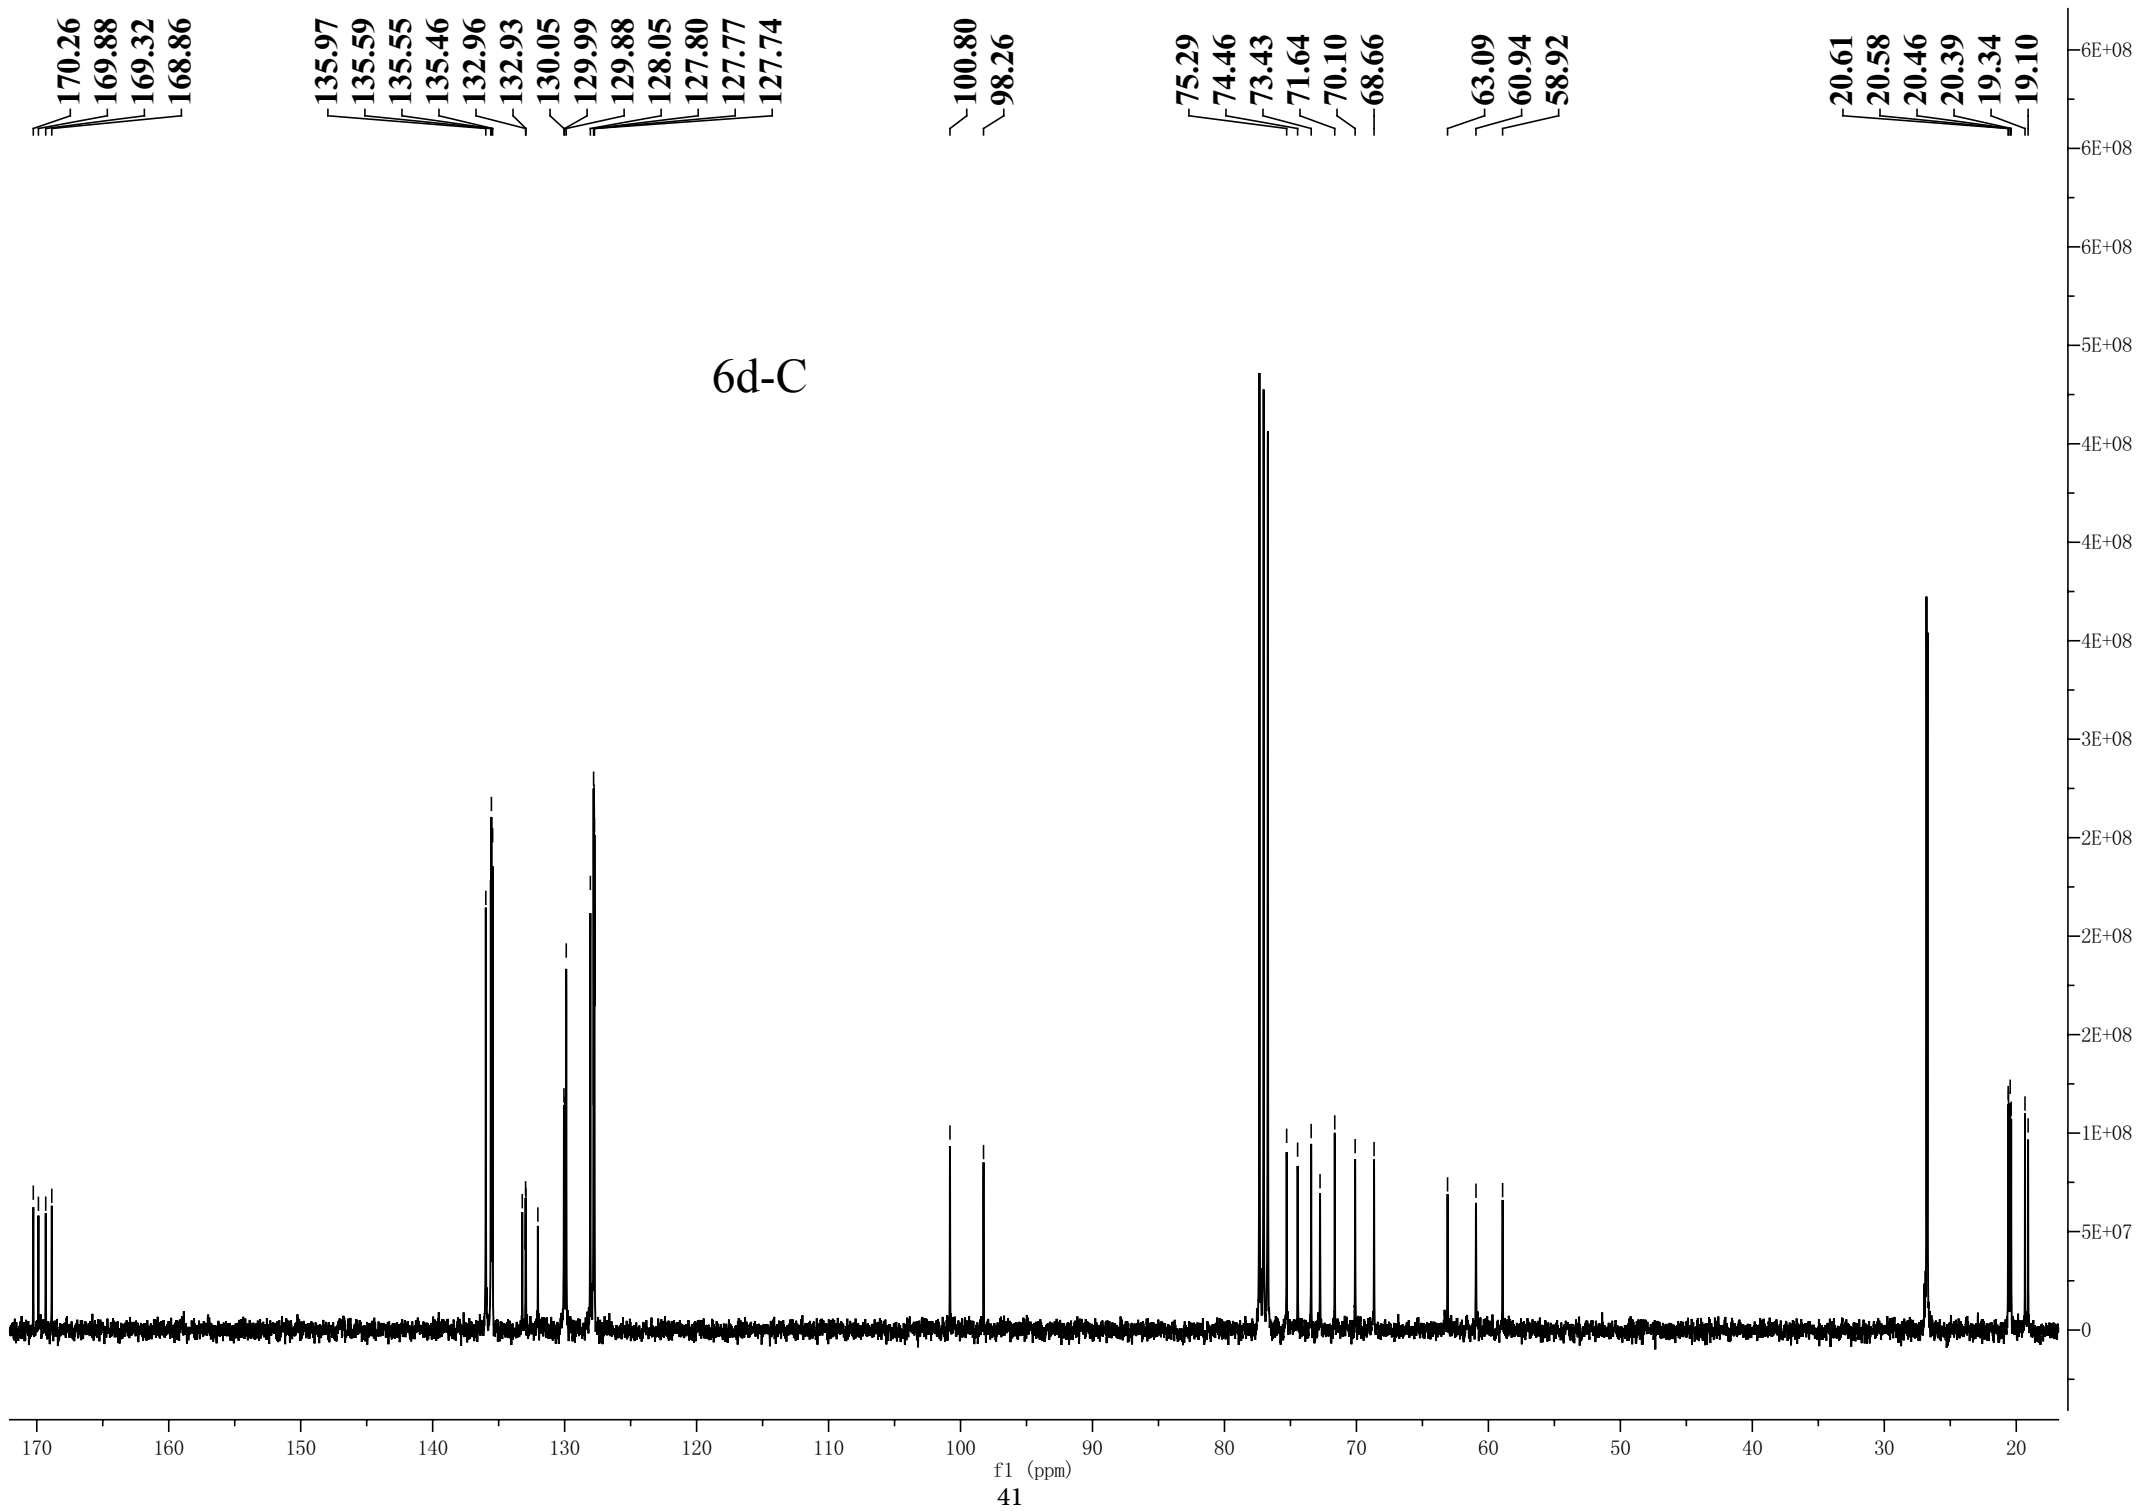

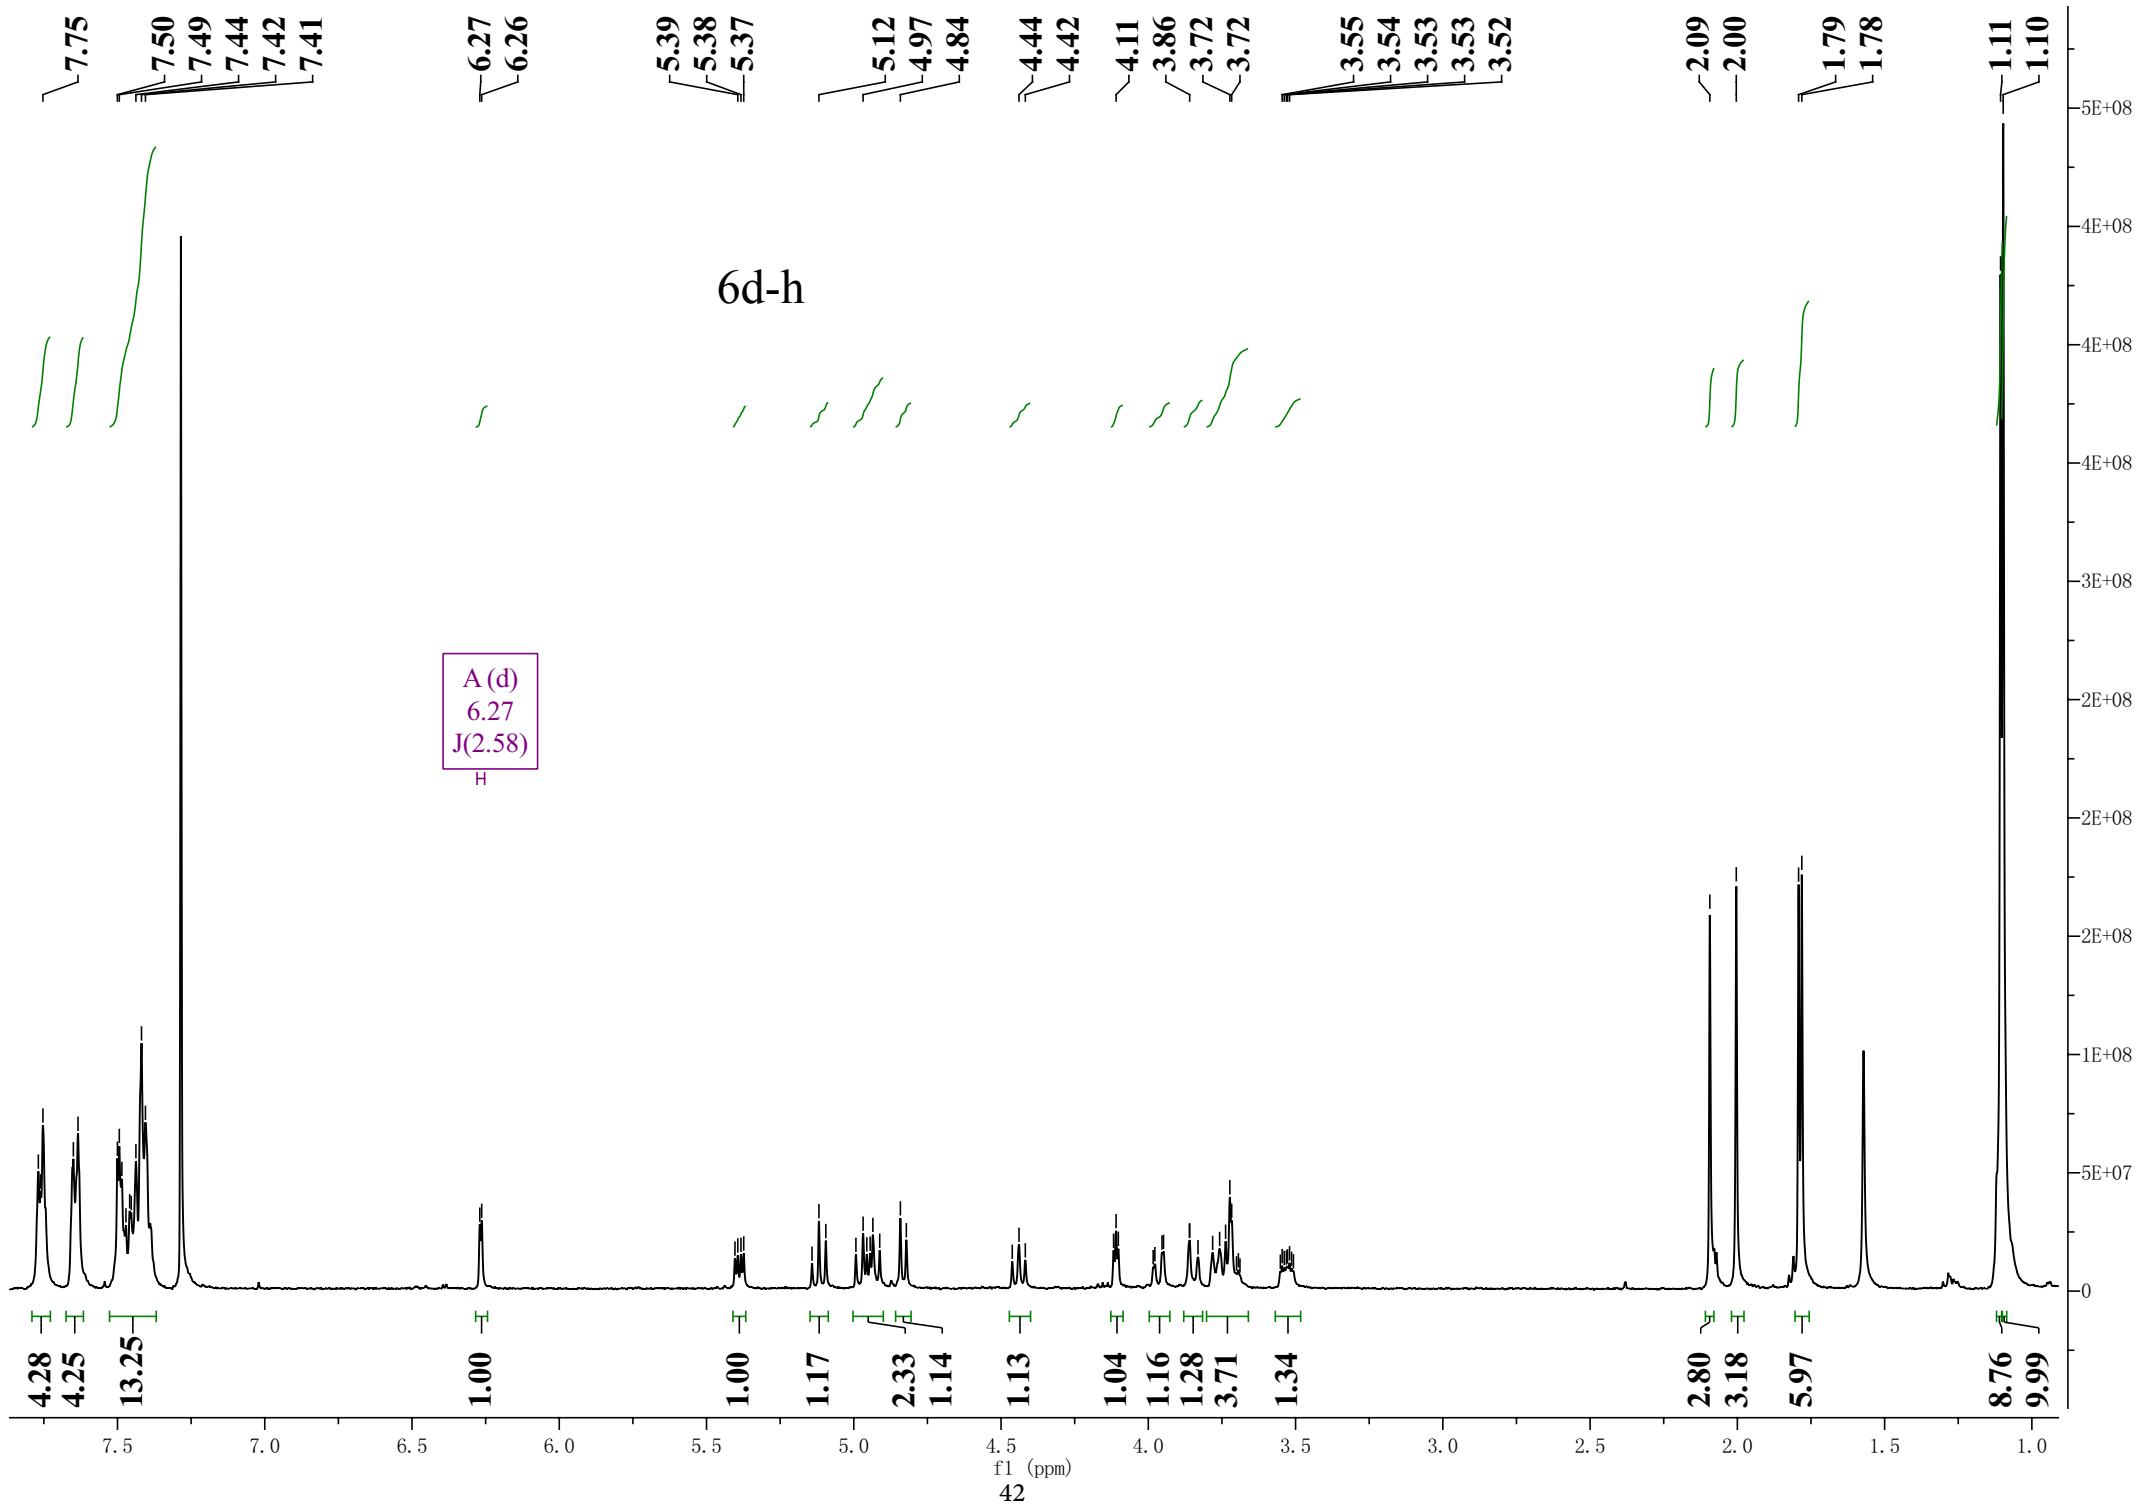

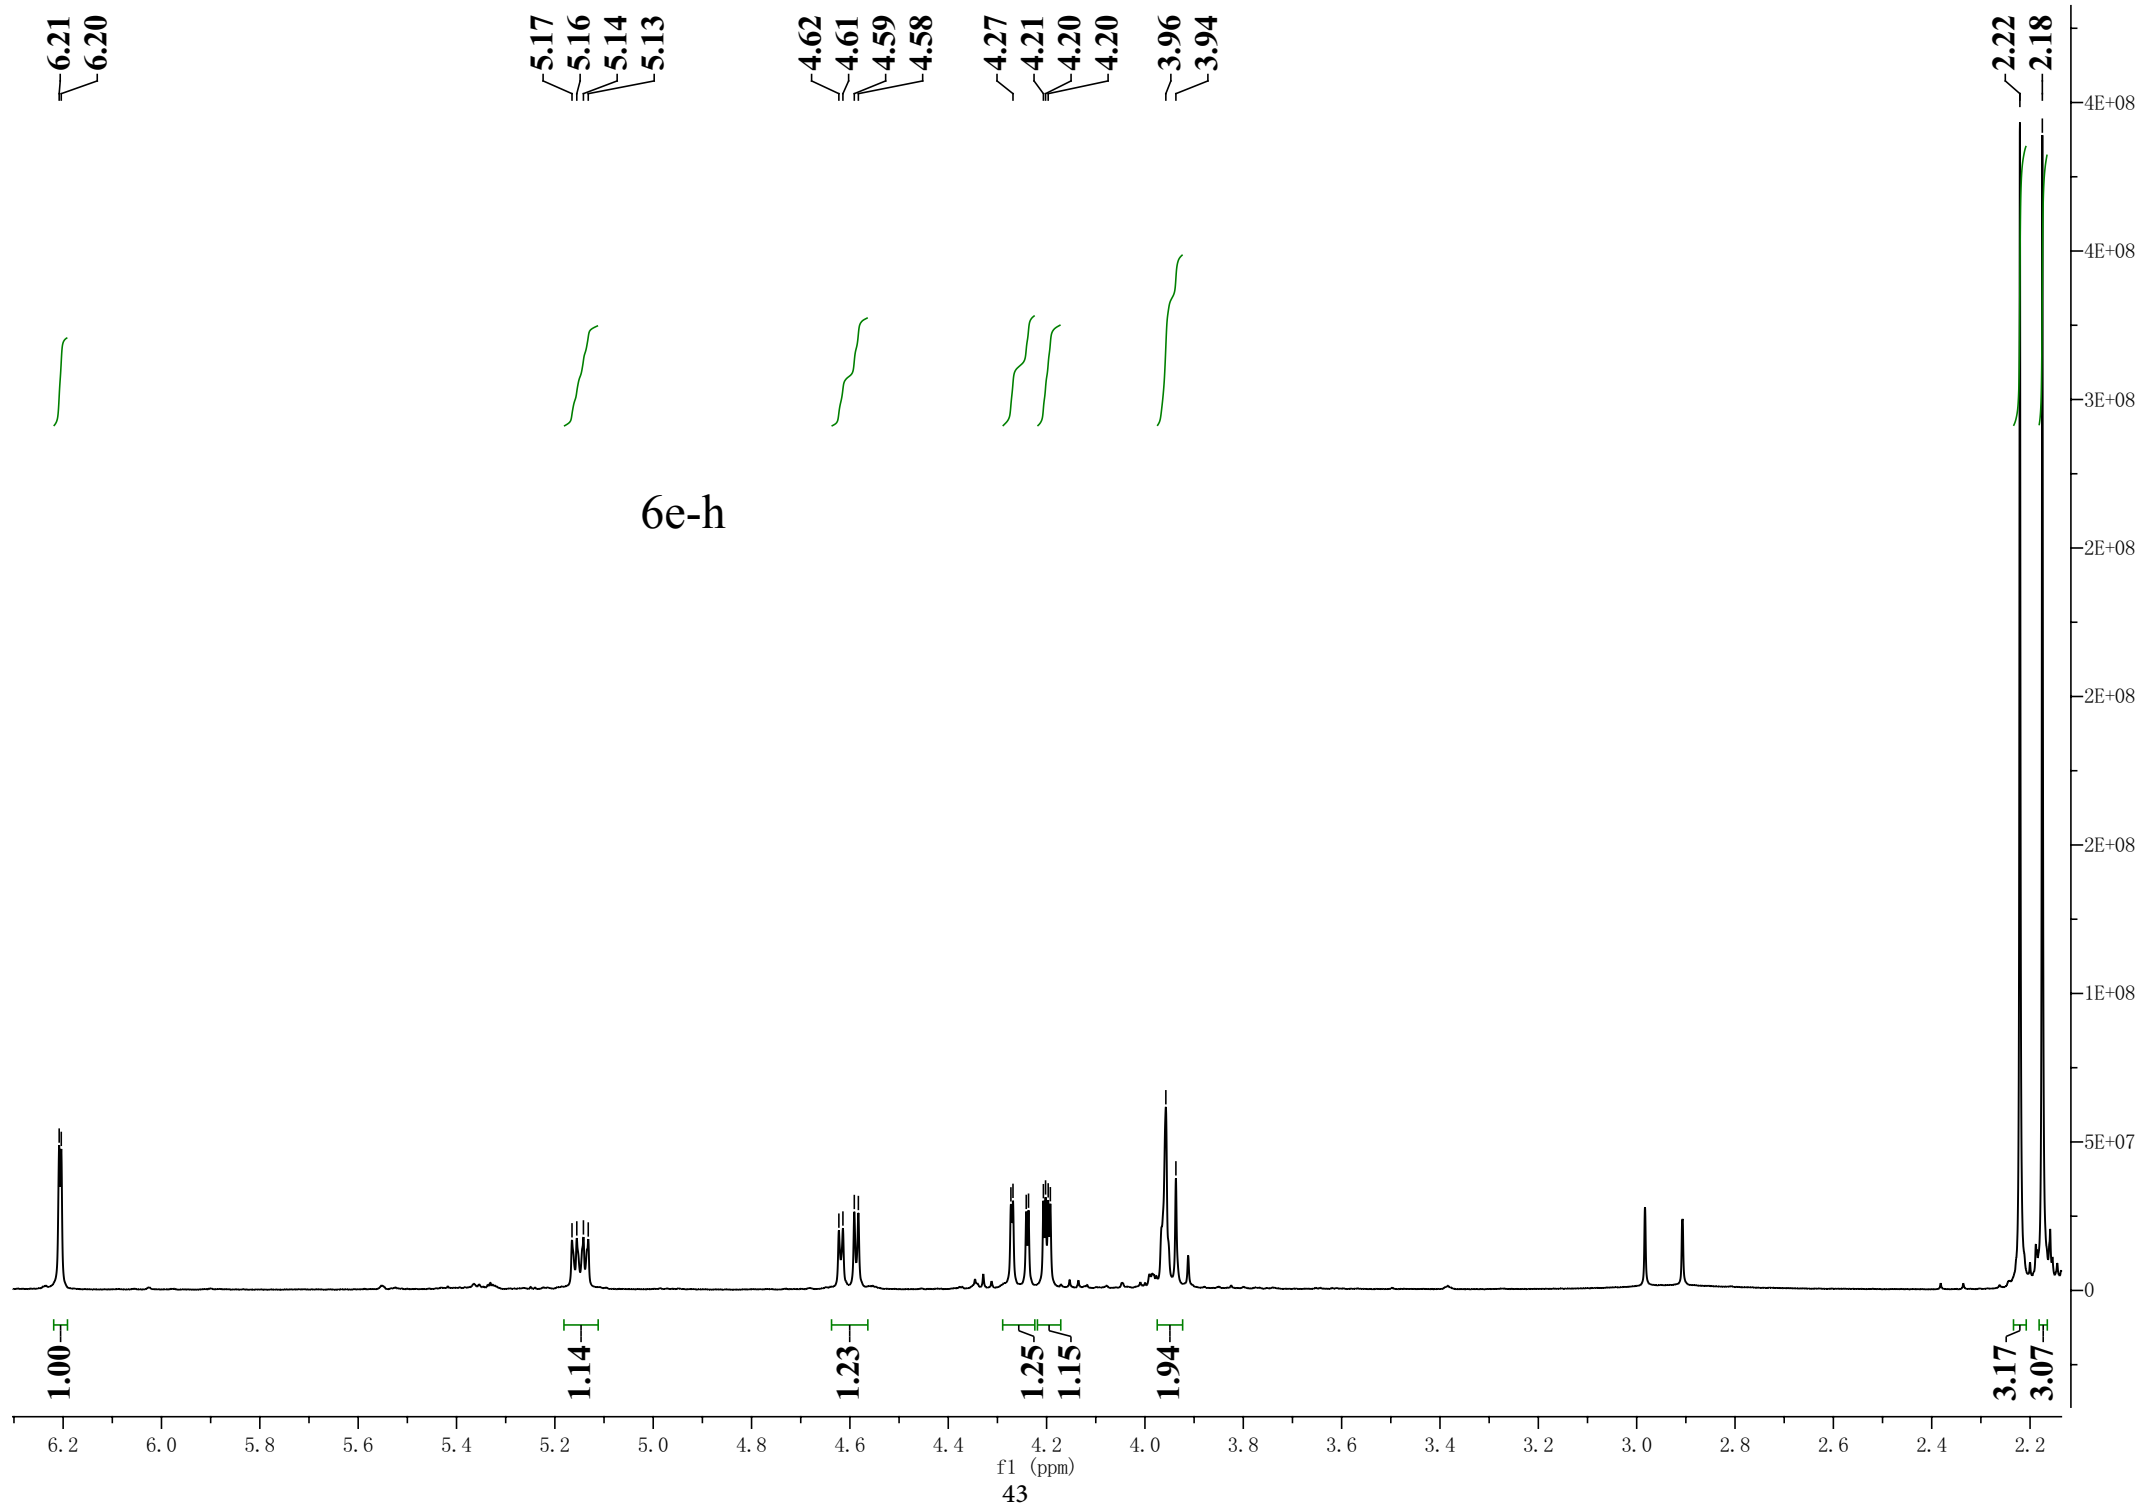

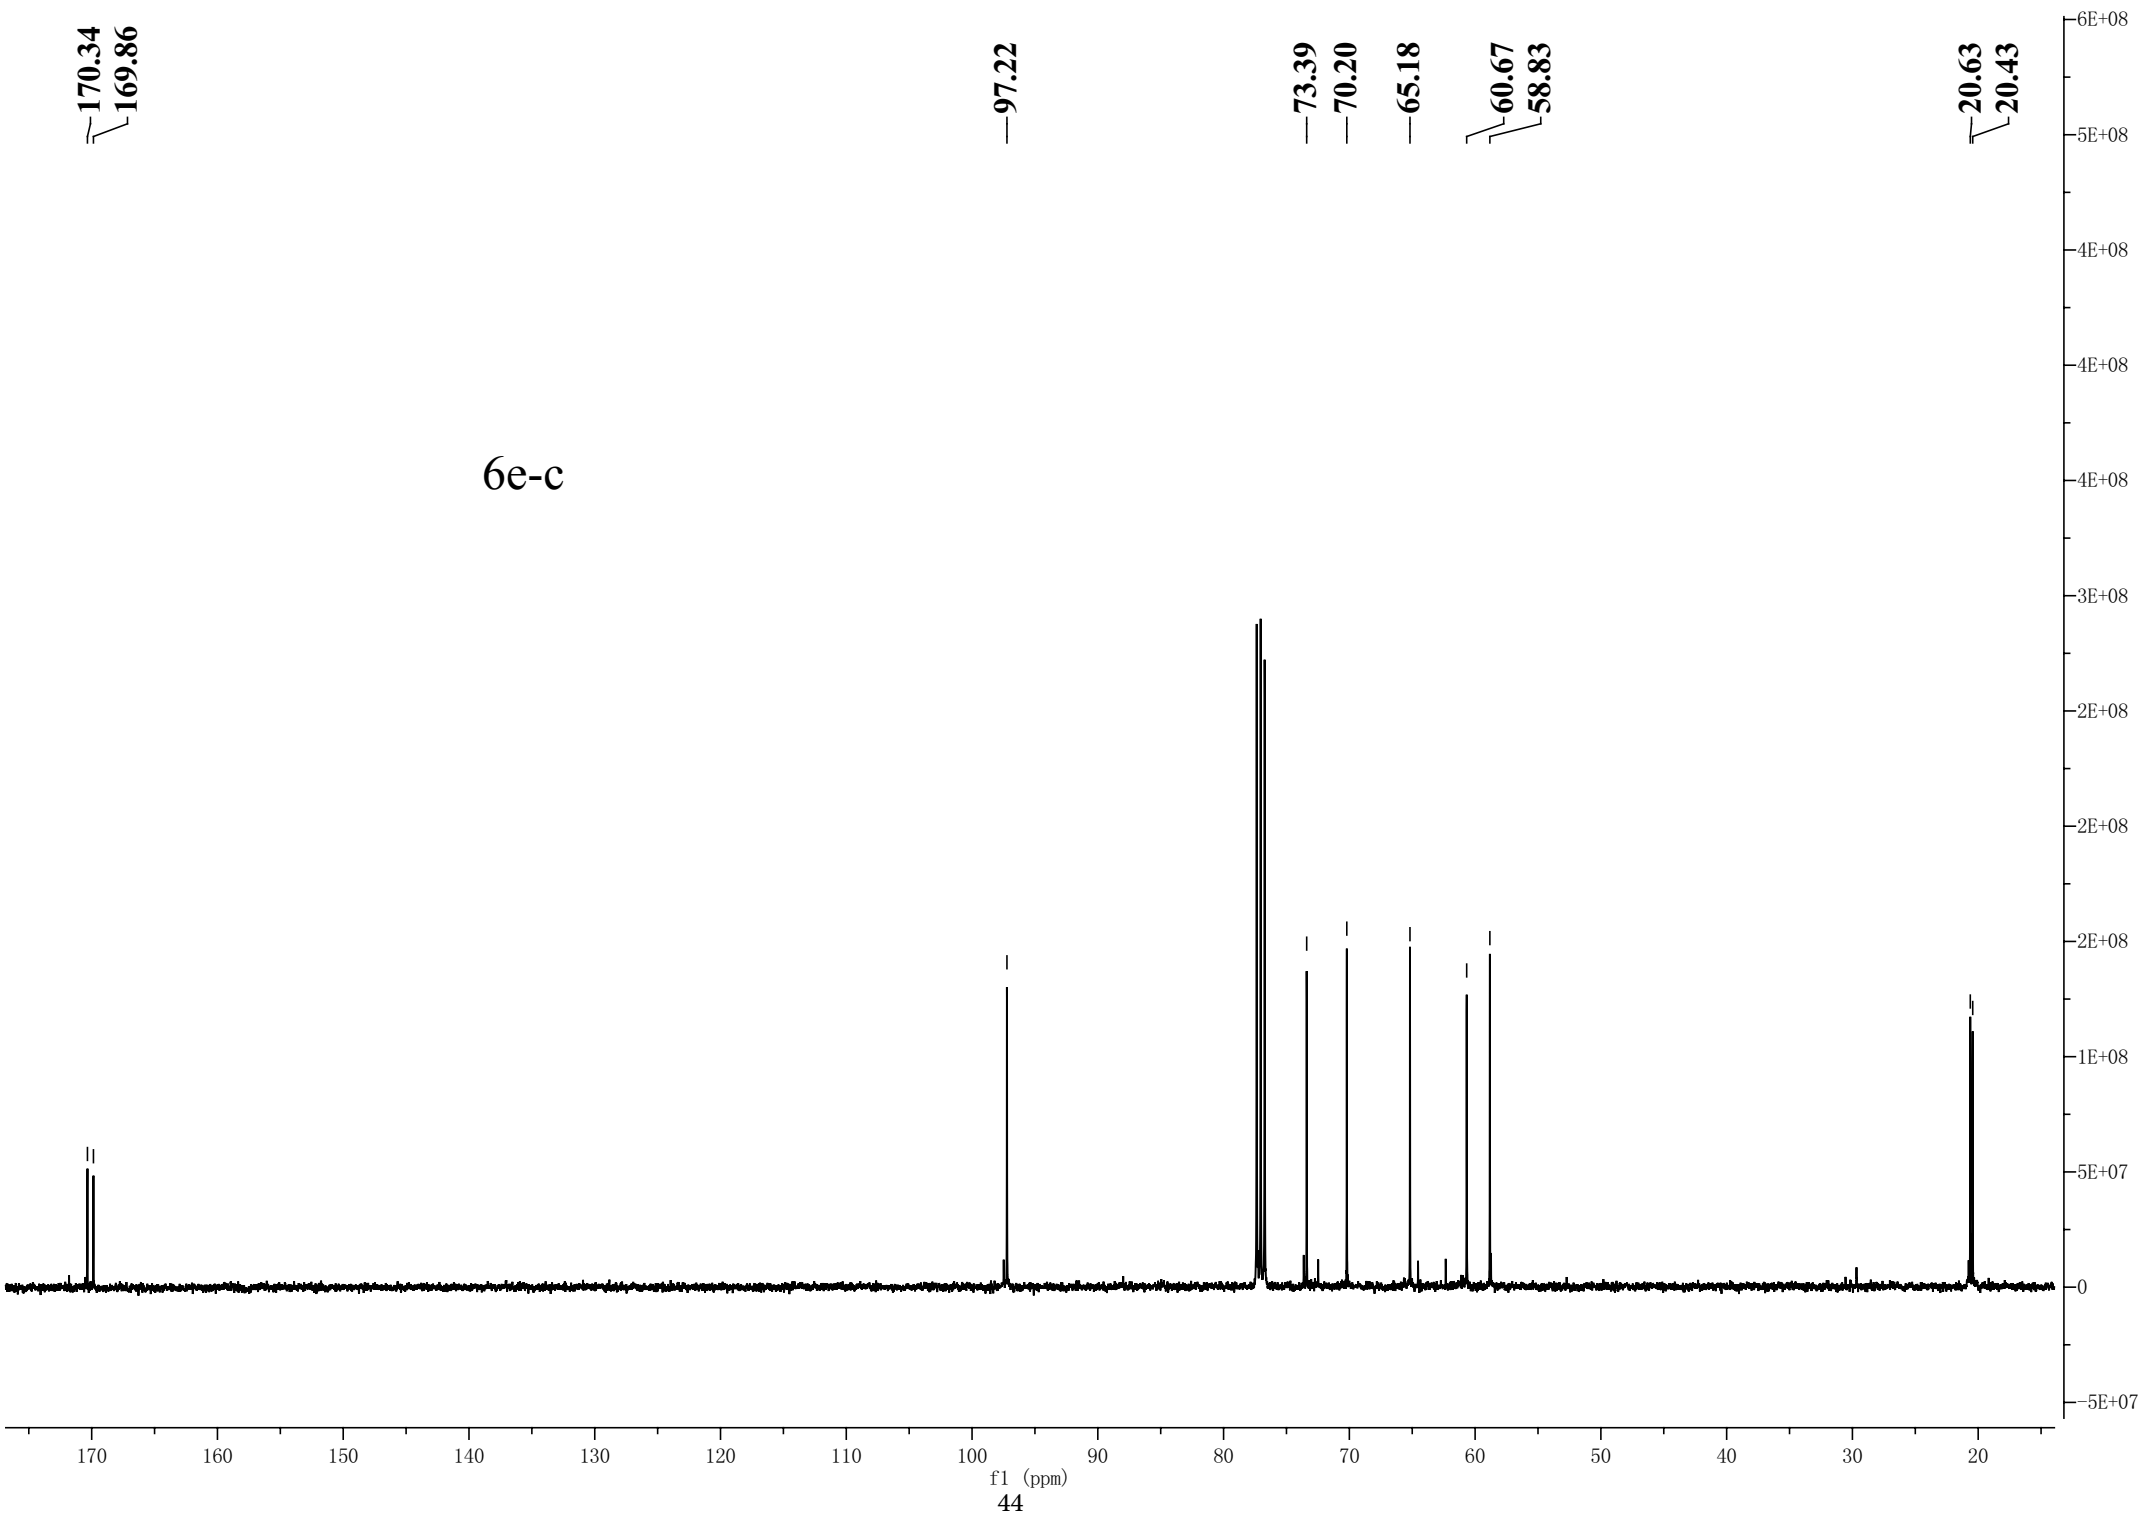

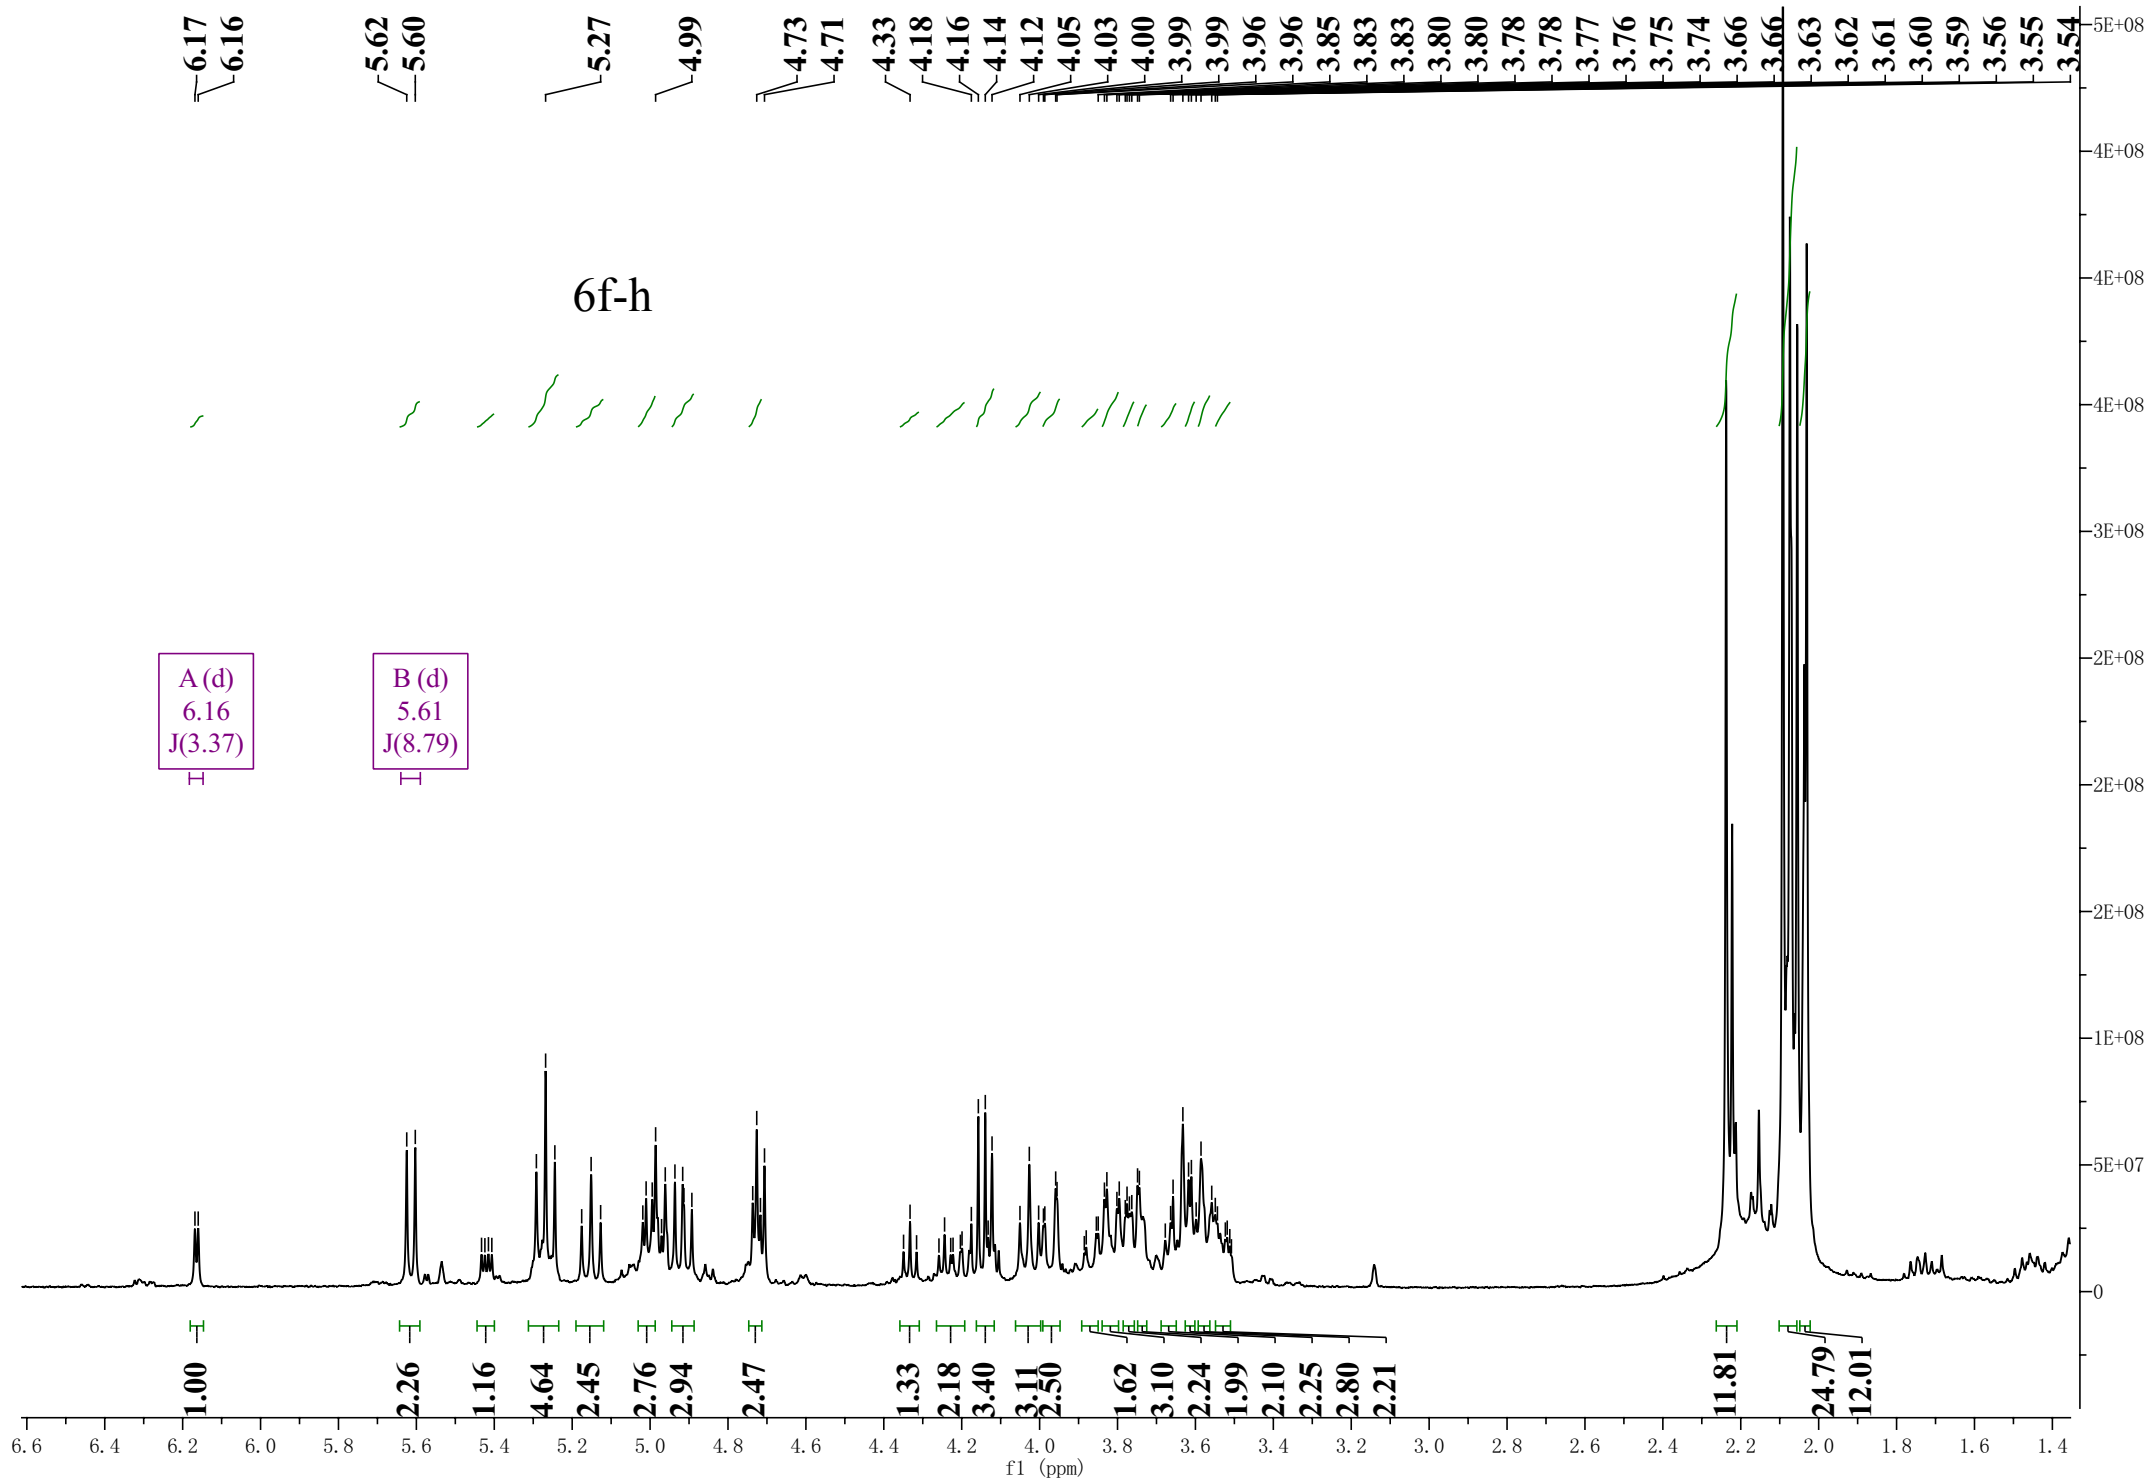

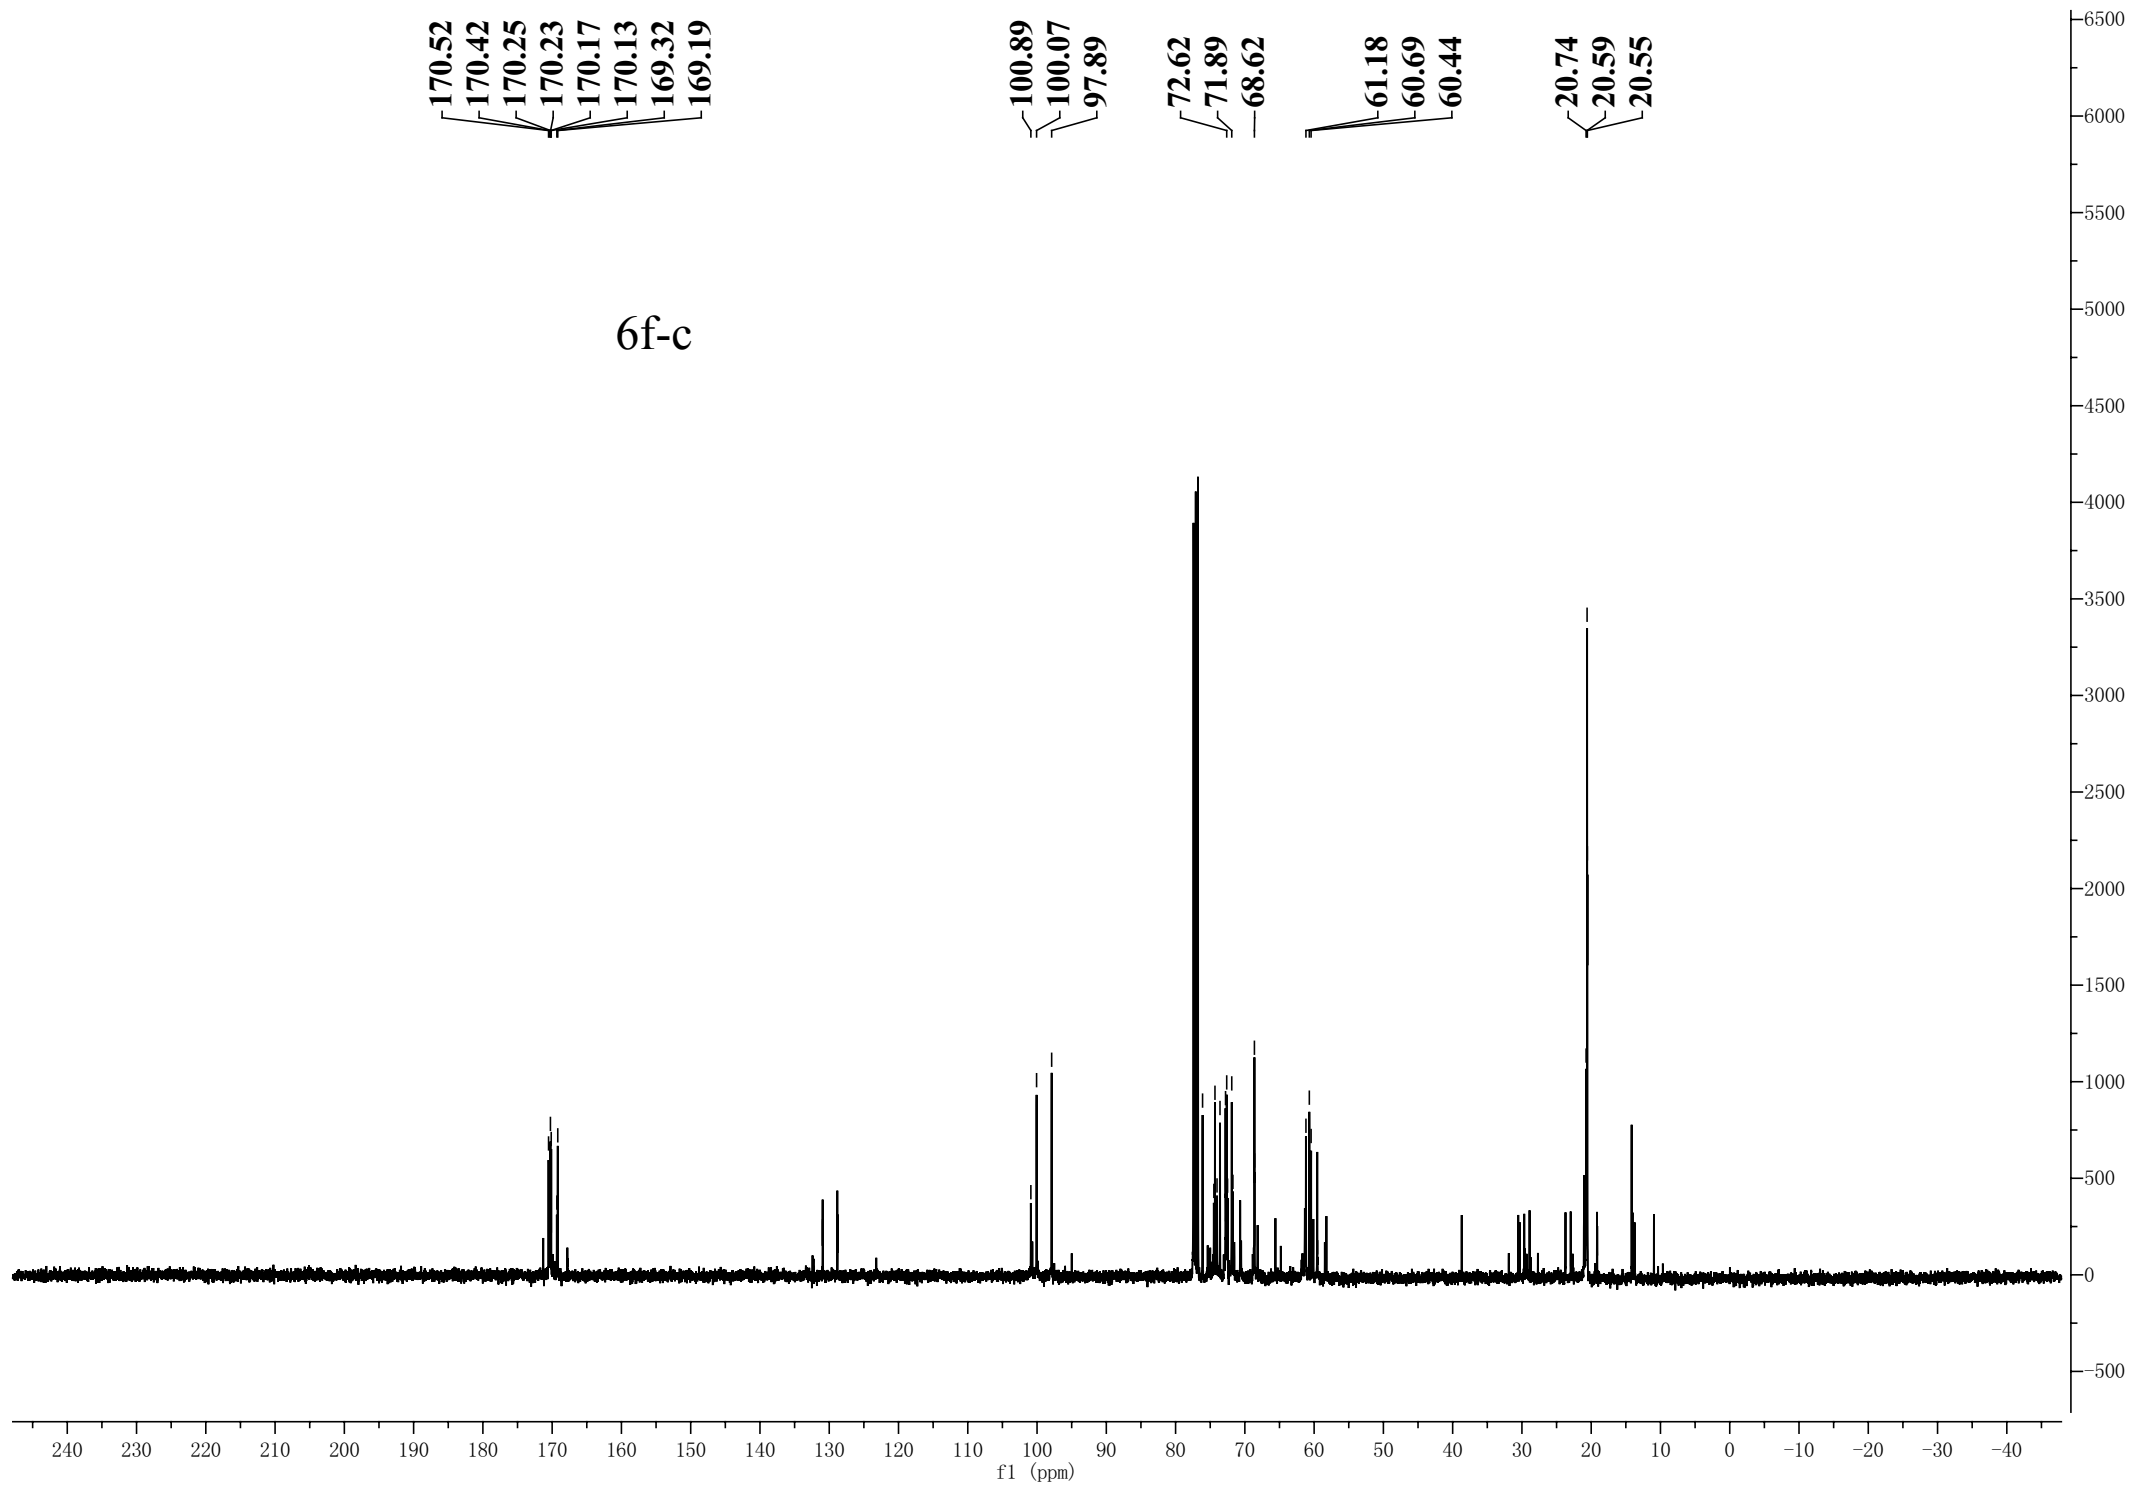

6f-c





177.35  
176.92  
175.97

105.71  
104.55  
102.83

82.08

74.85  
71.03

66.14  
62.73

54.27  
53.02

44.68  
42.58

24.57  
24.37

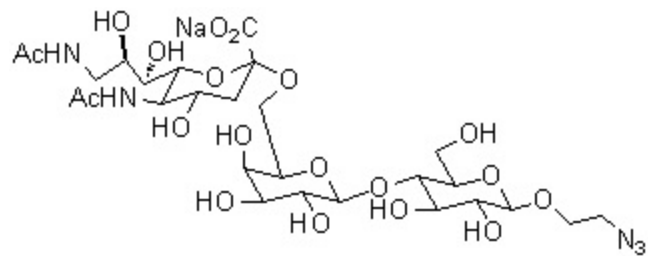

12-c

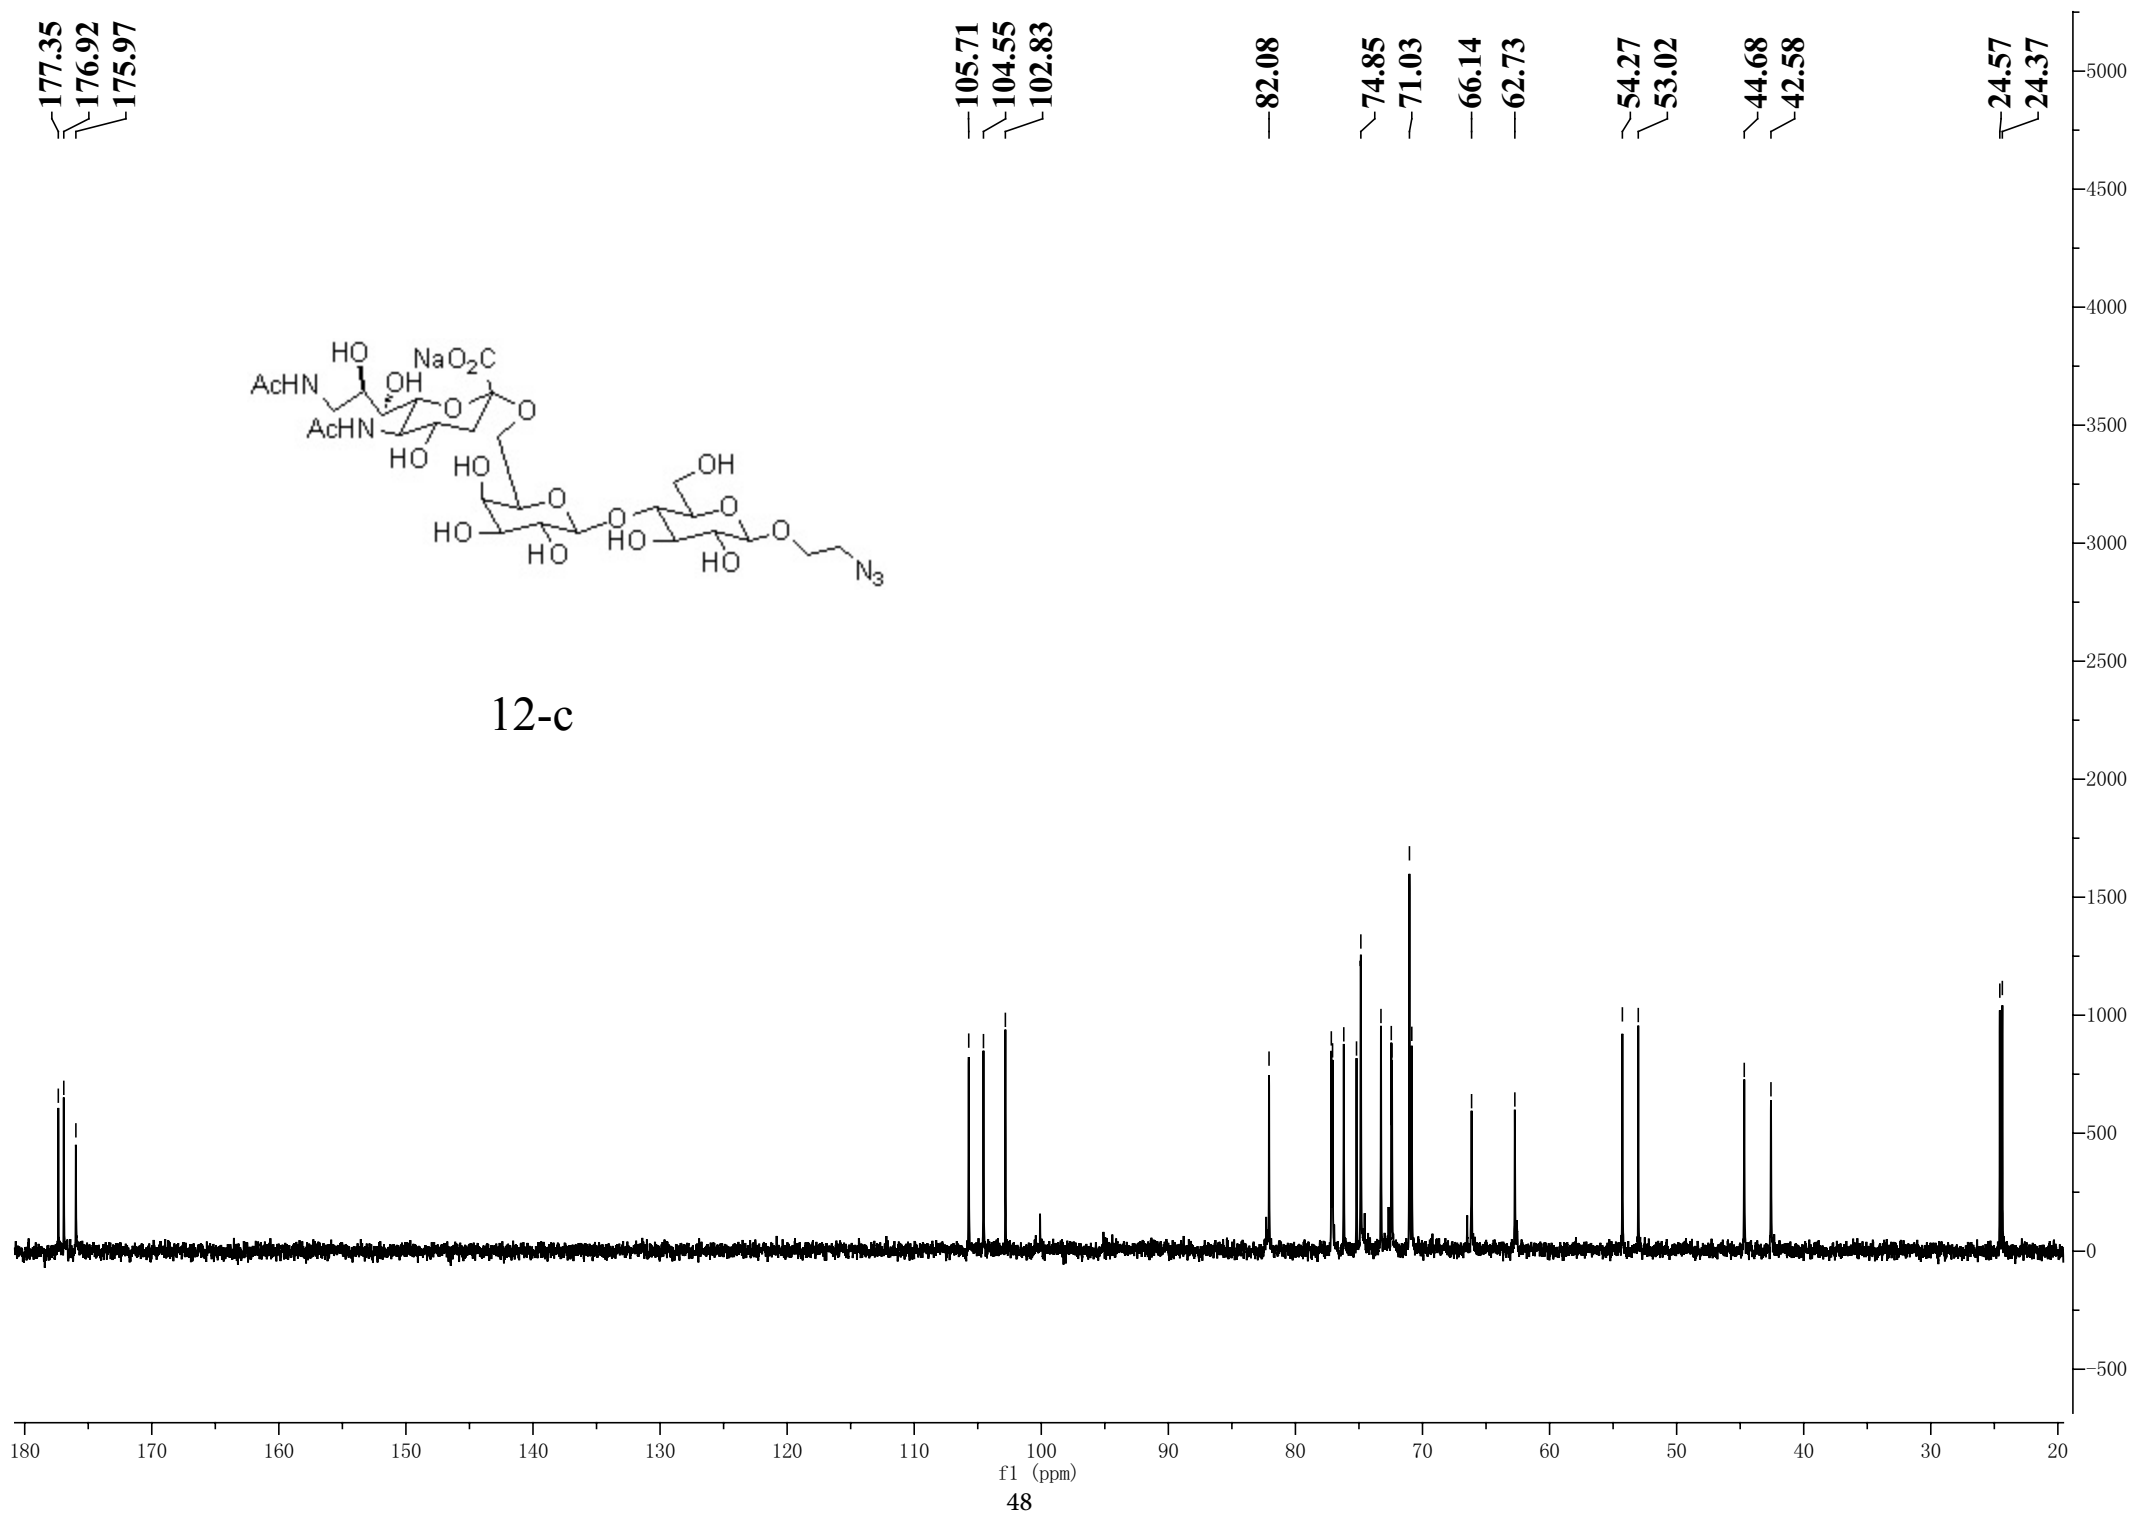

# 12-COSY

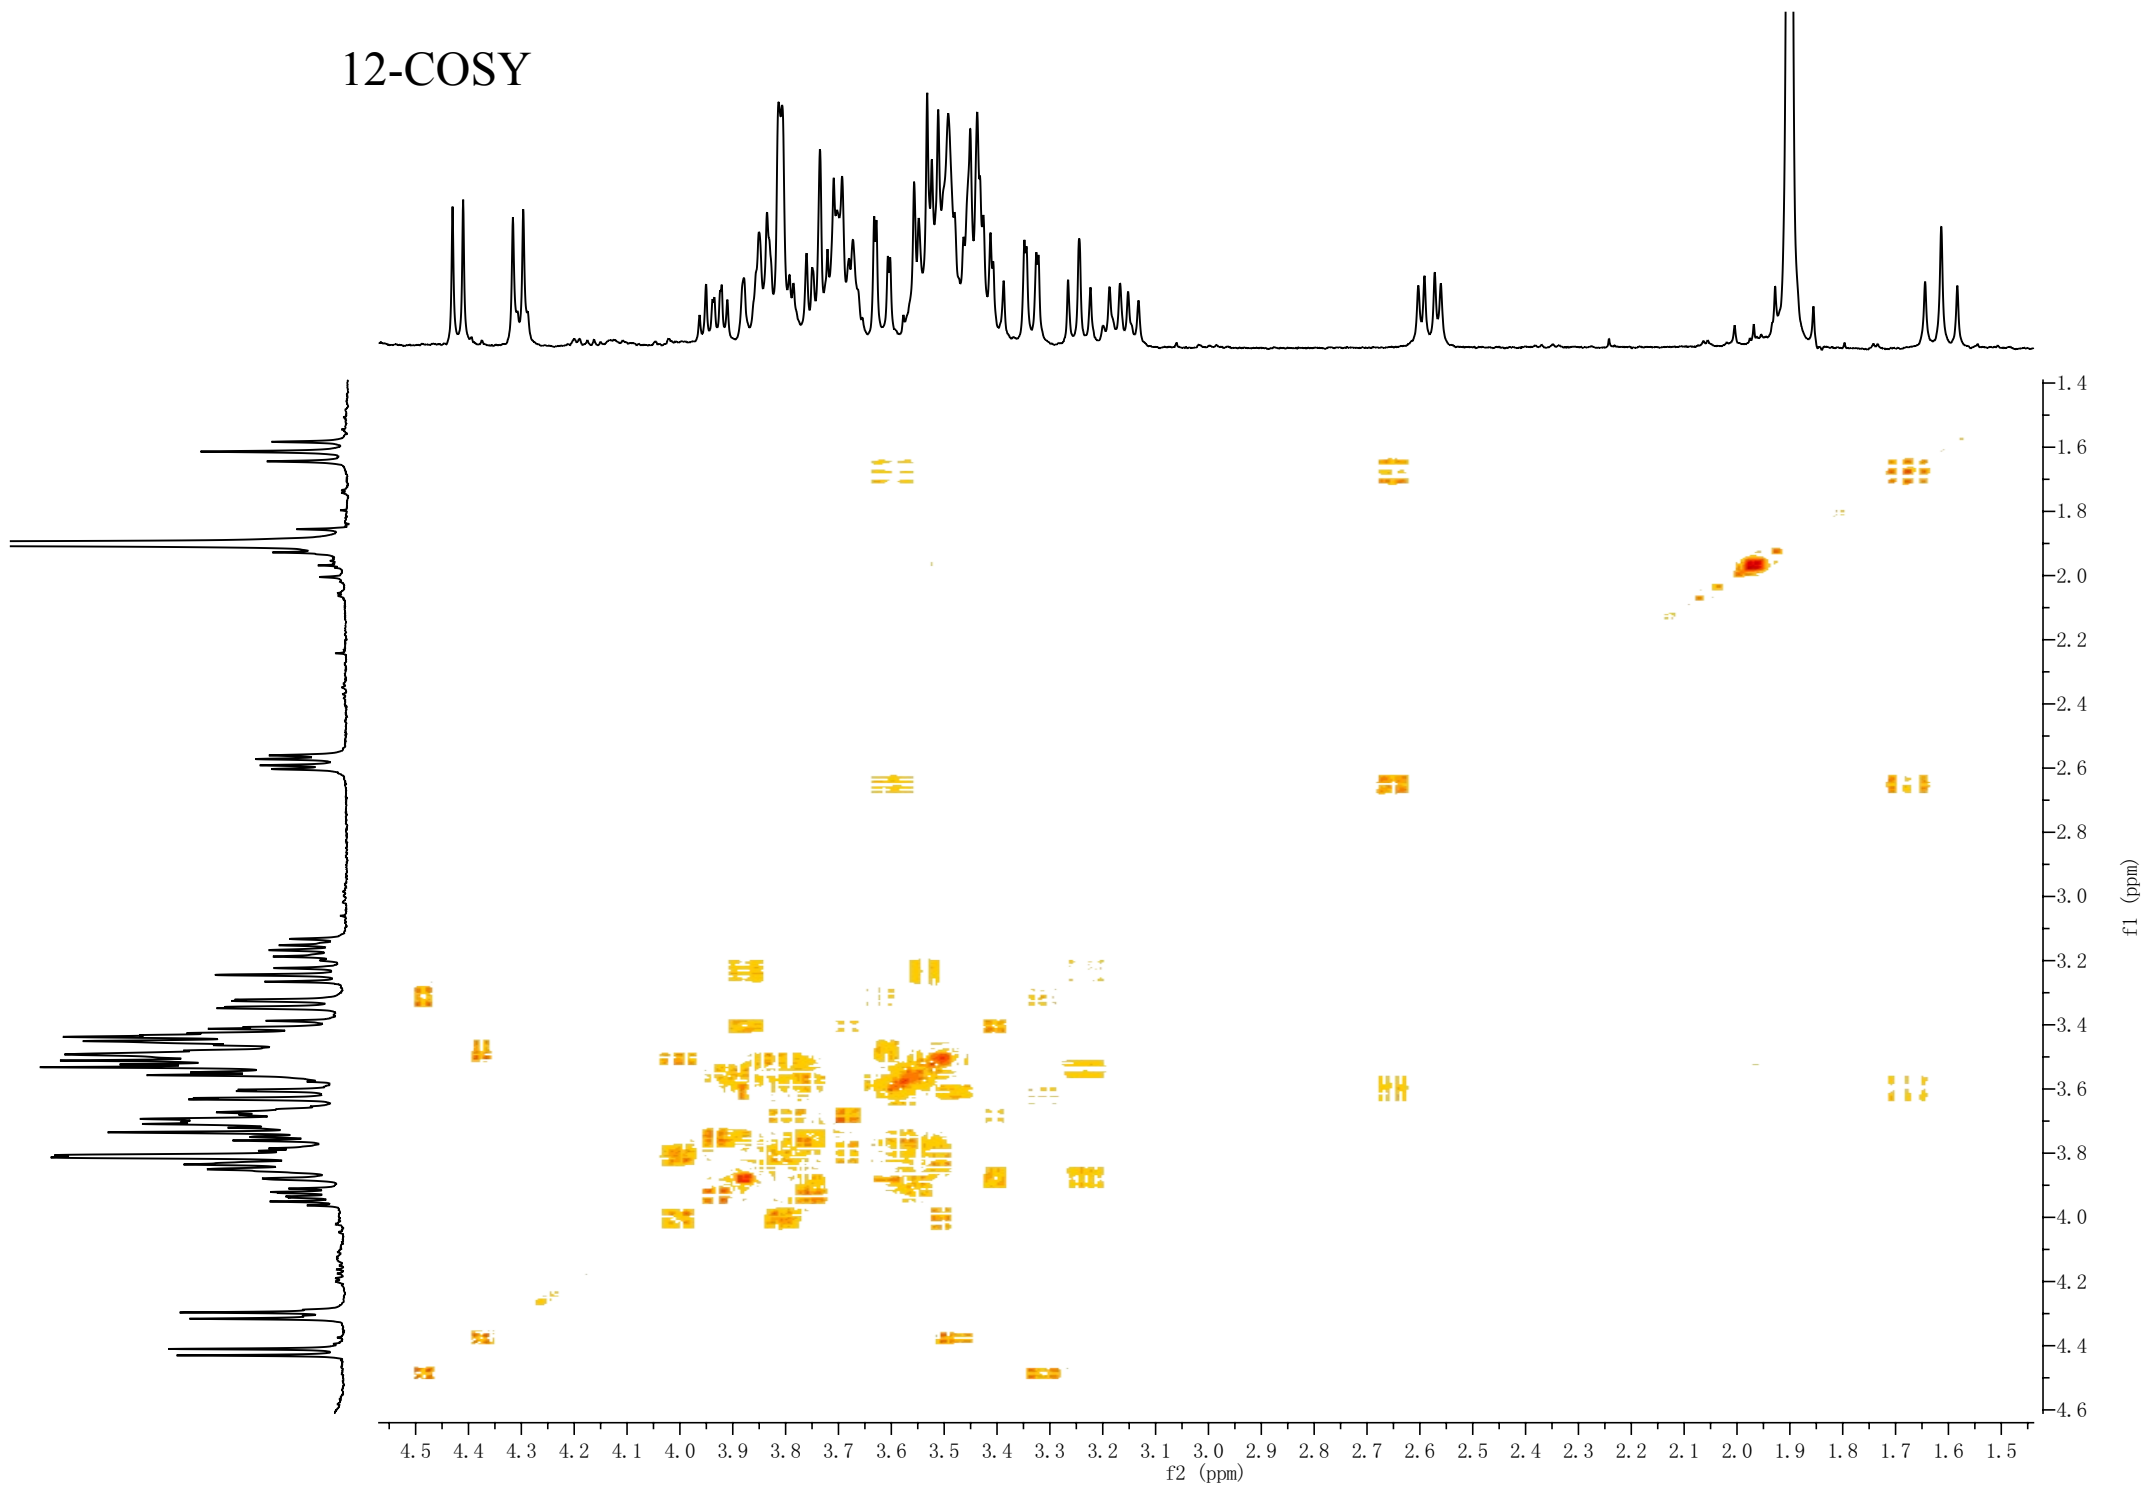

12-dept135

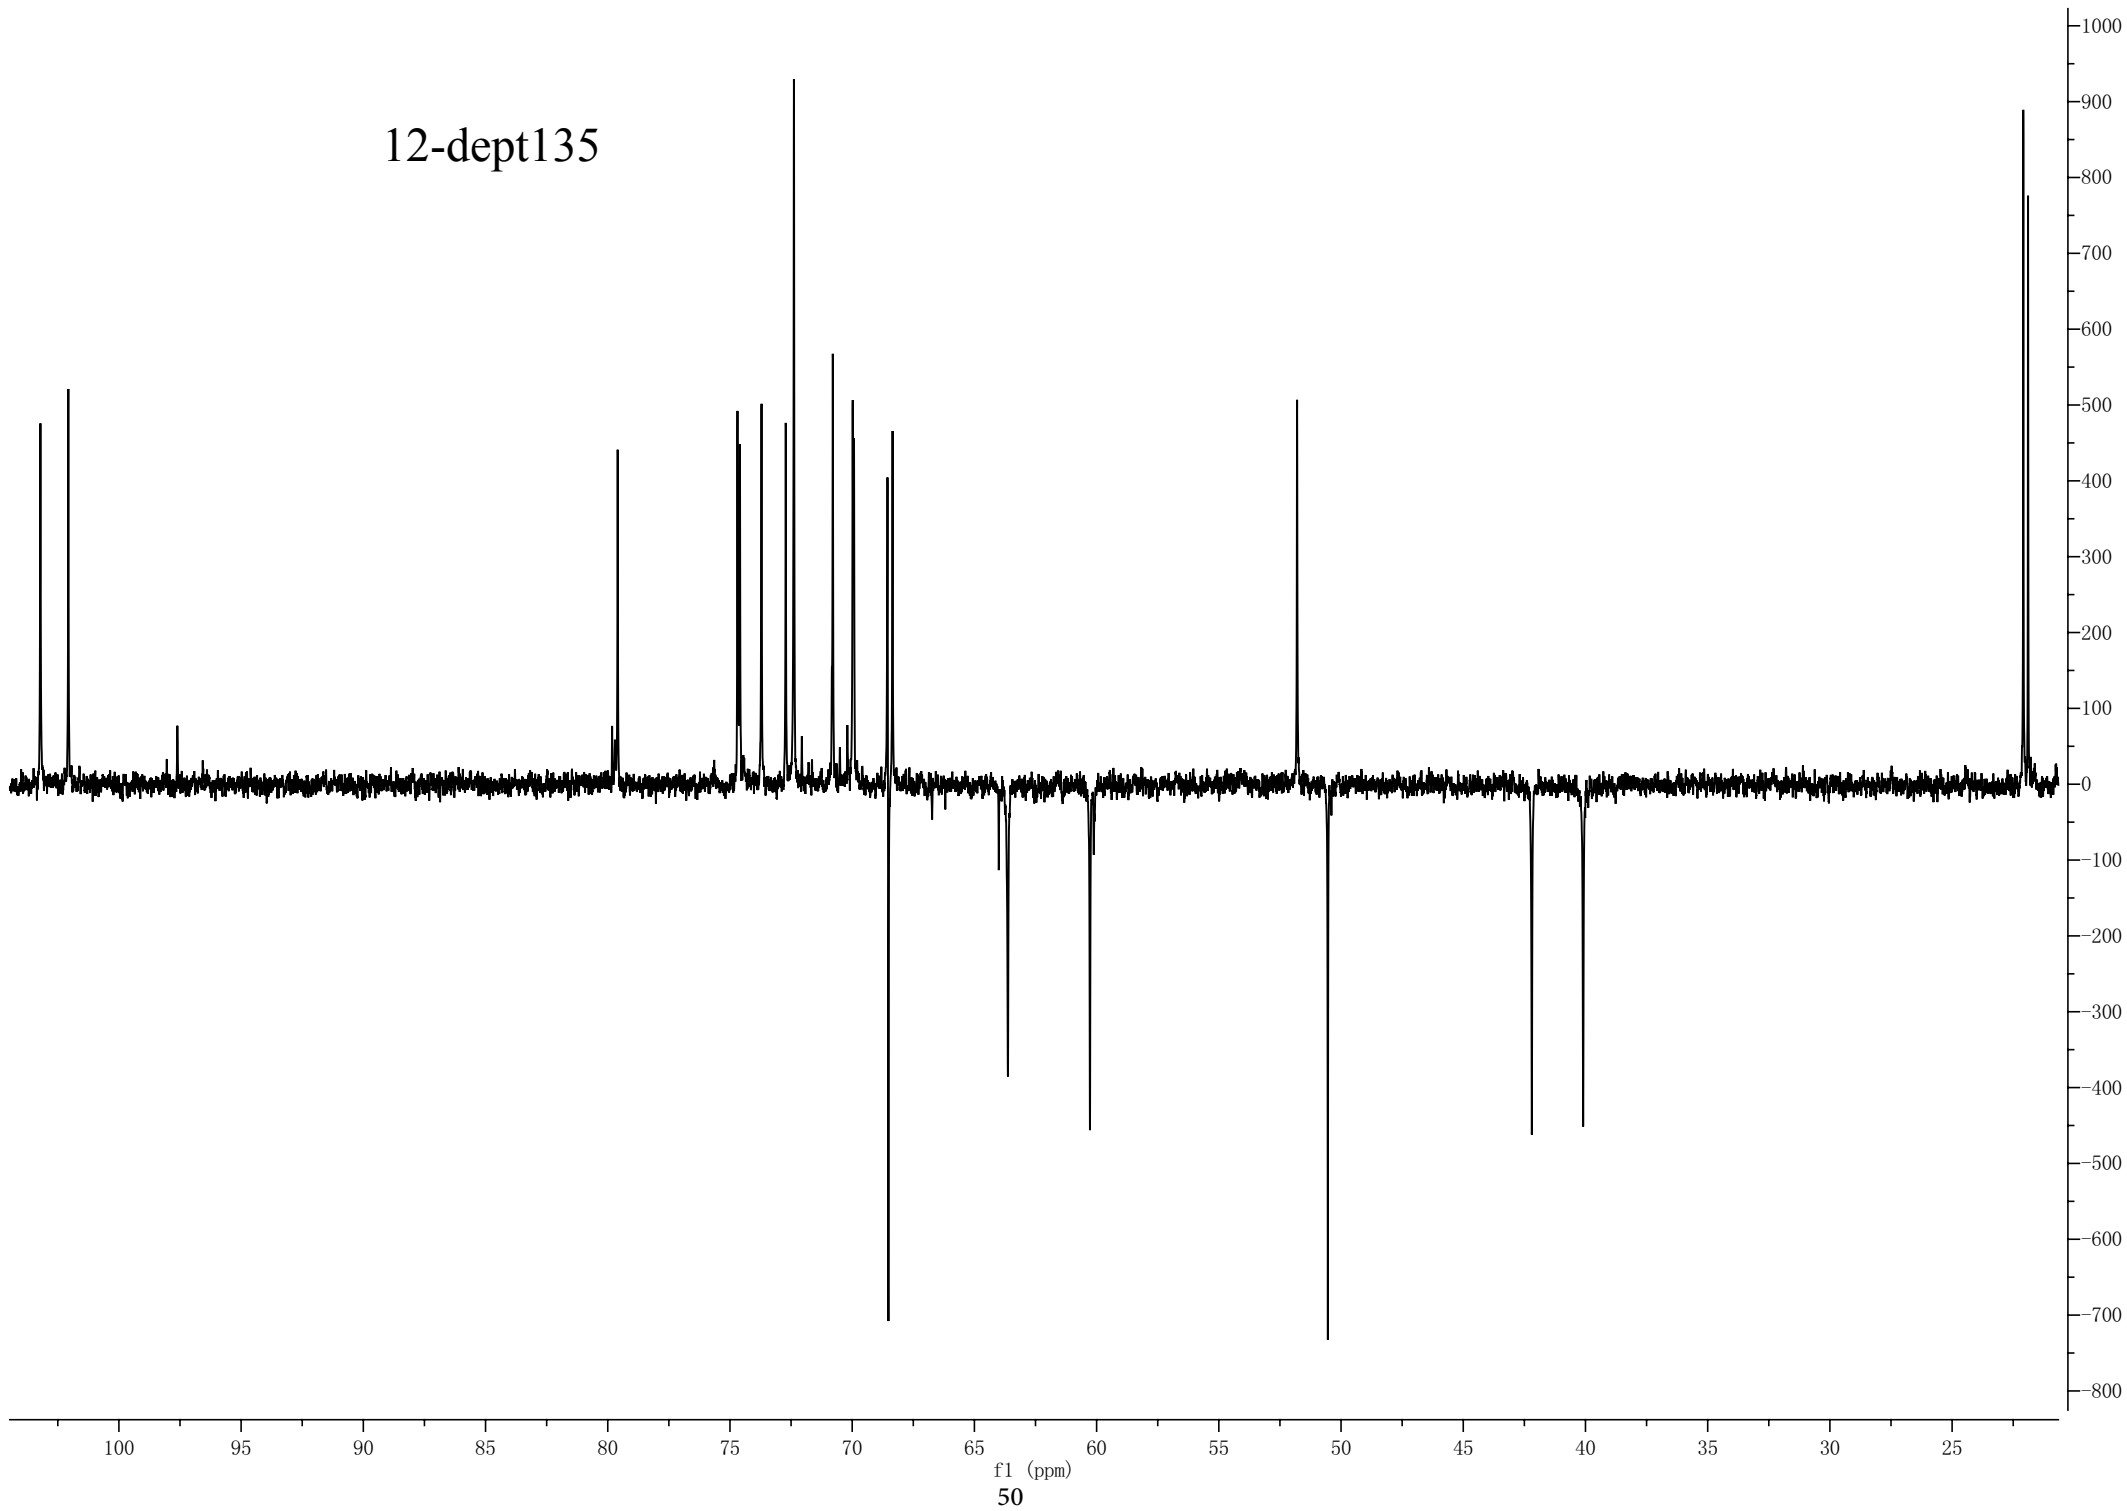

# 12-HMBC

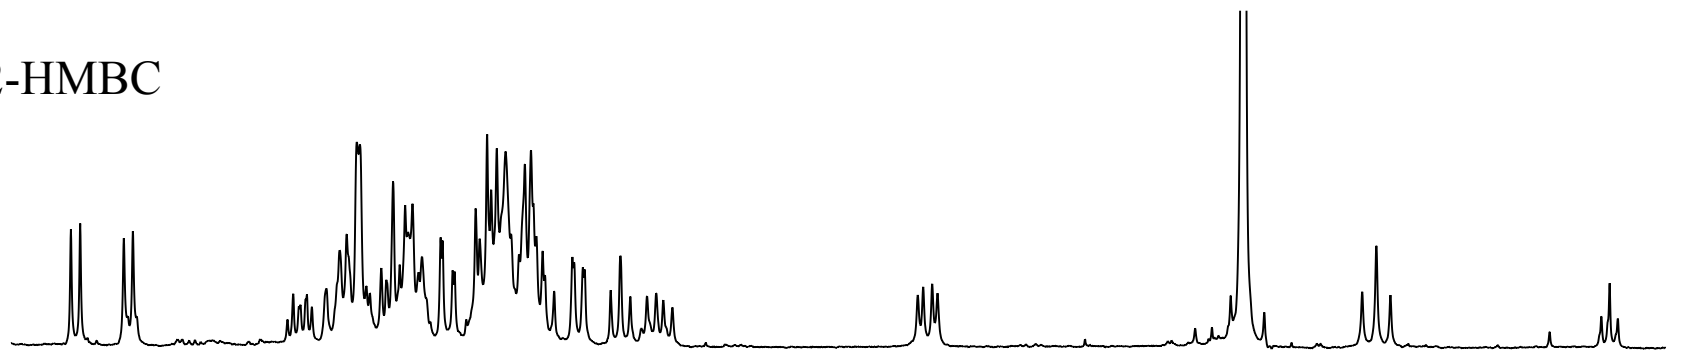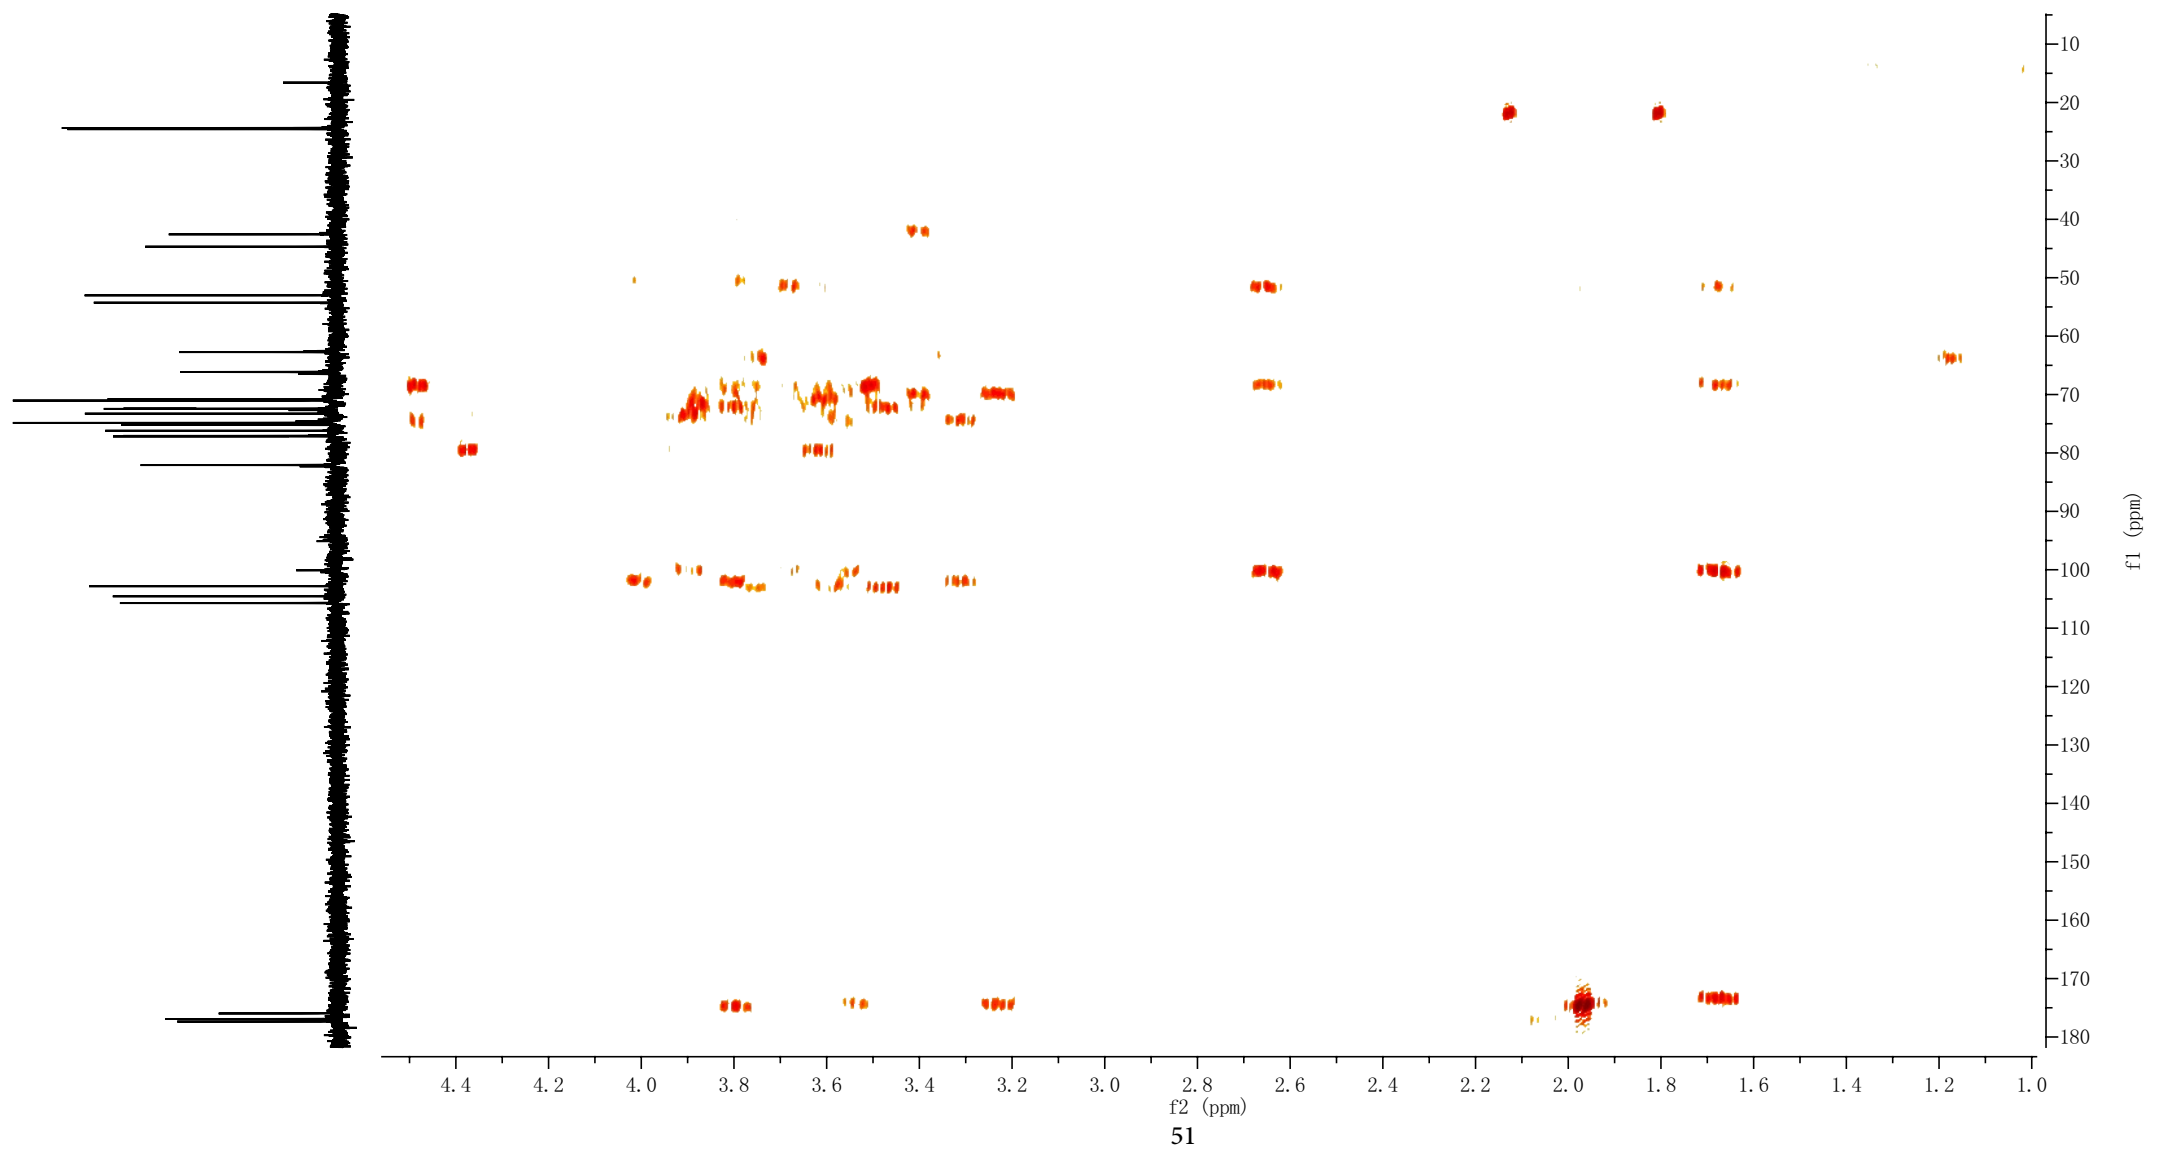

# 12-HMQC

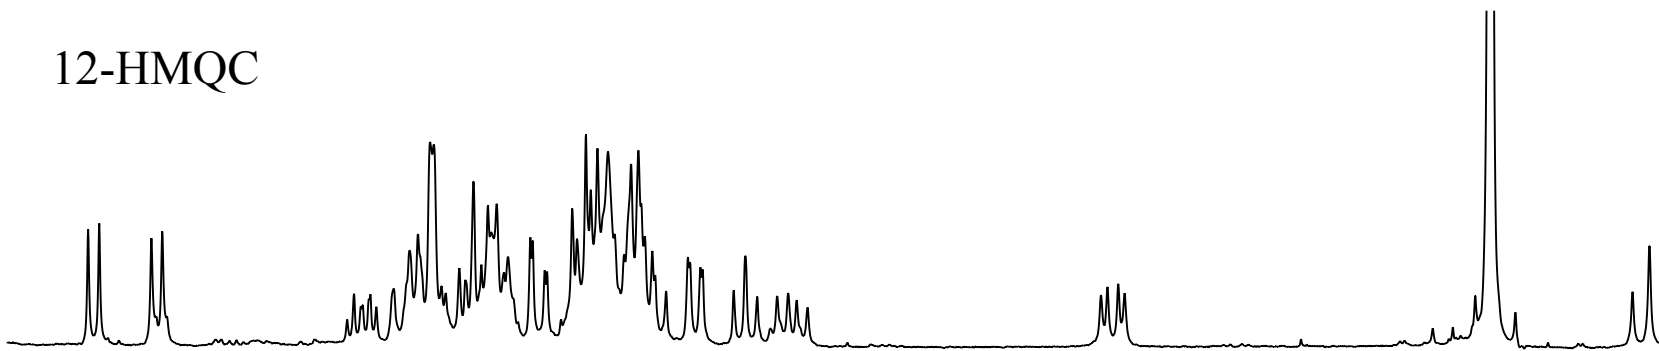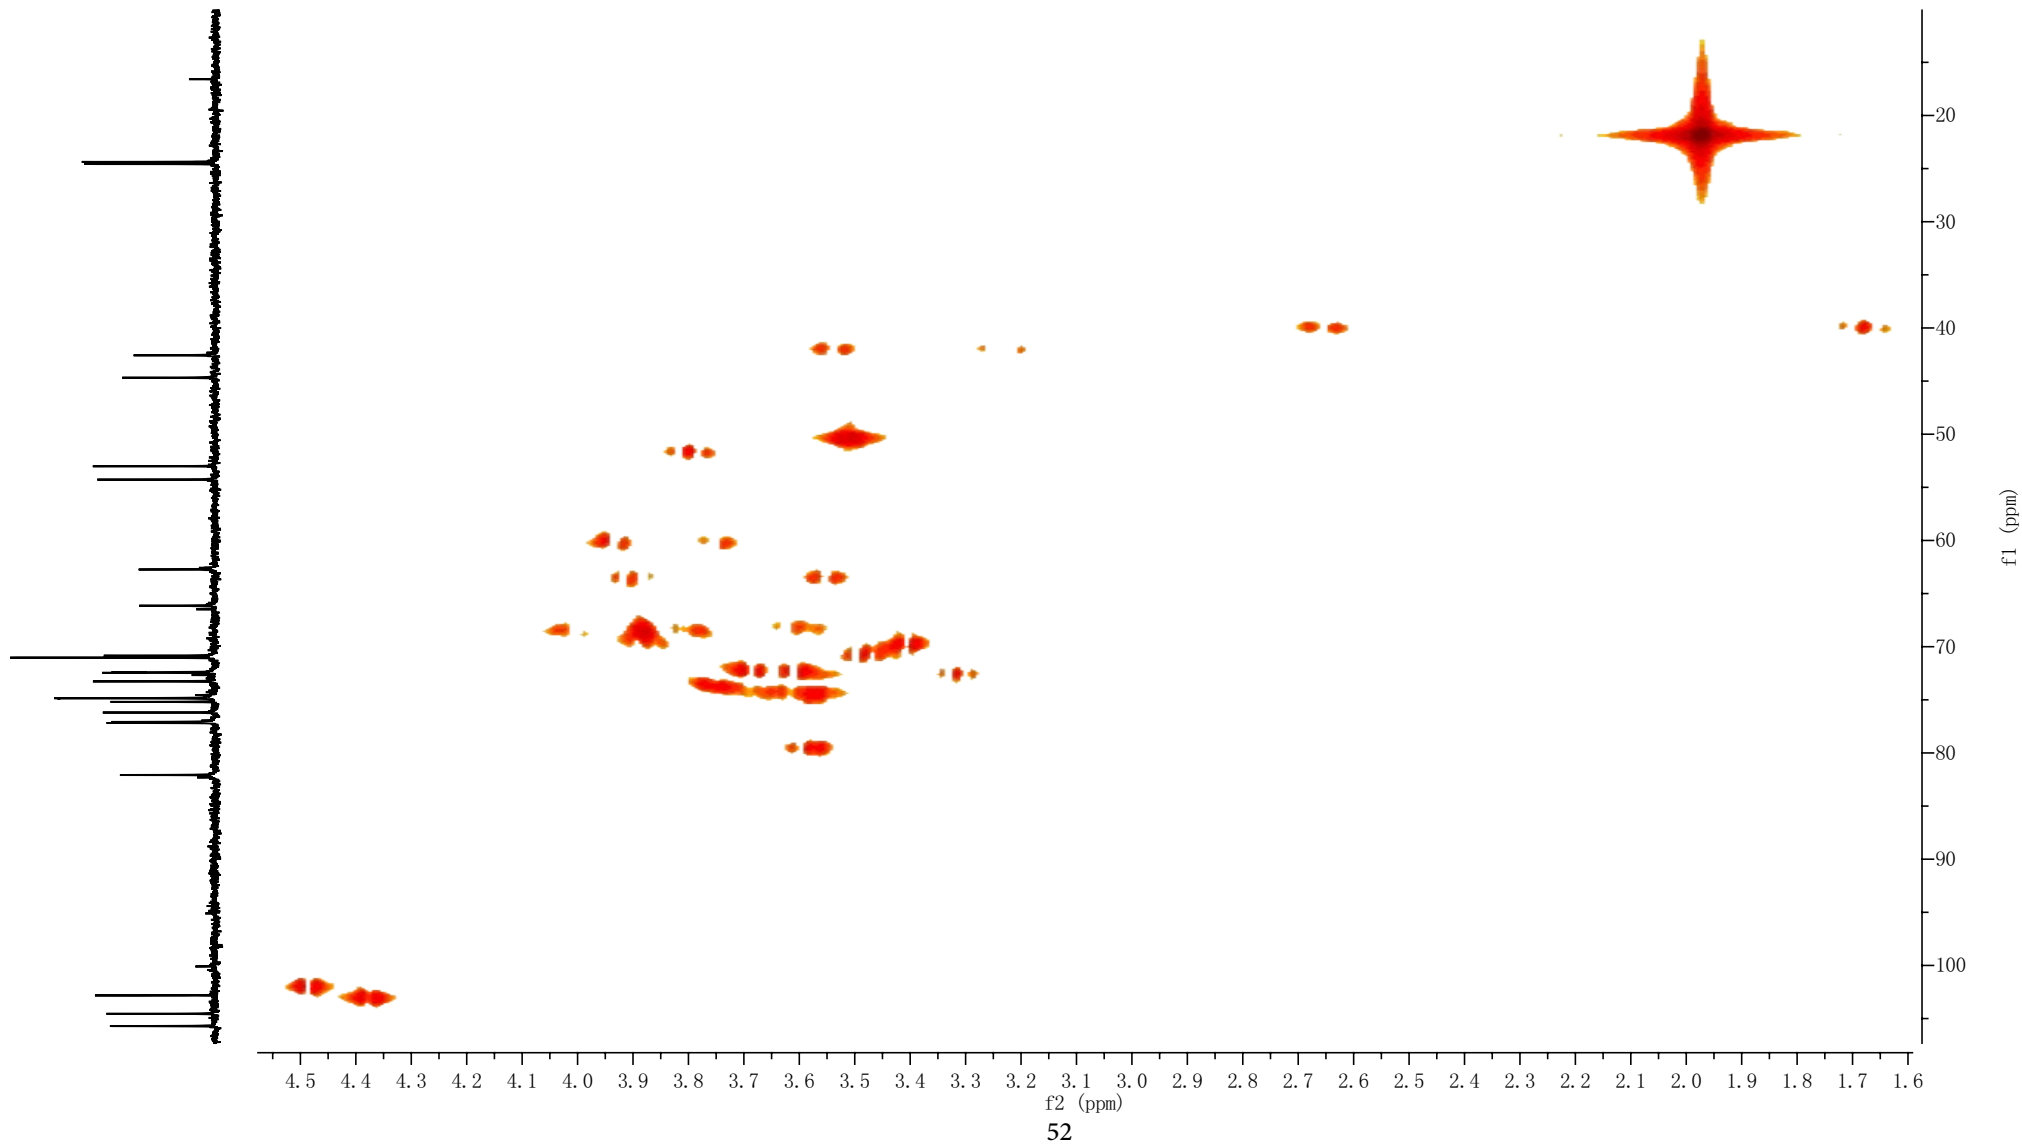

Sample Name LC/MS  
Inj Vol 3  
Data Filename WWJ72401.d  
Position P1-A1  
InjPosition chen-ms.m  
ACQ Method  
Instrument Name P1-A1  
SampleType  
Comment  
User Name  
IRM Calibration Status  
Acquired Time  
Some Ions Missed  
11/9/2012 9:59:55 AM

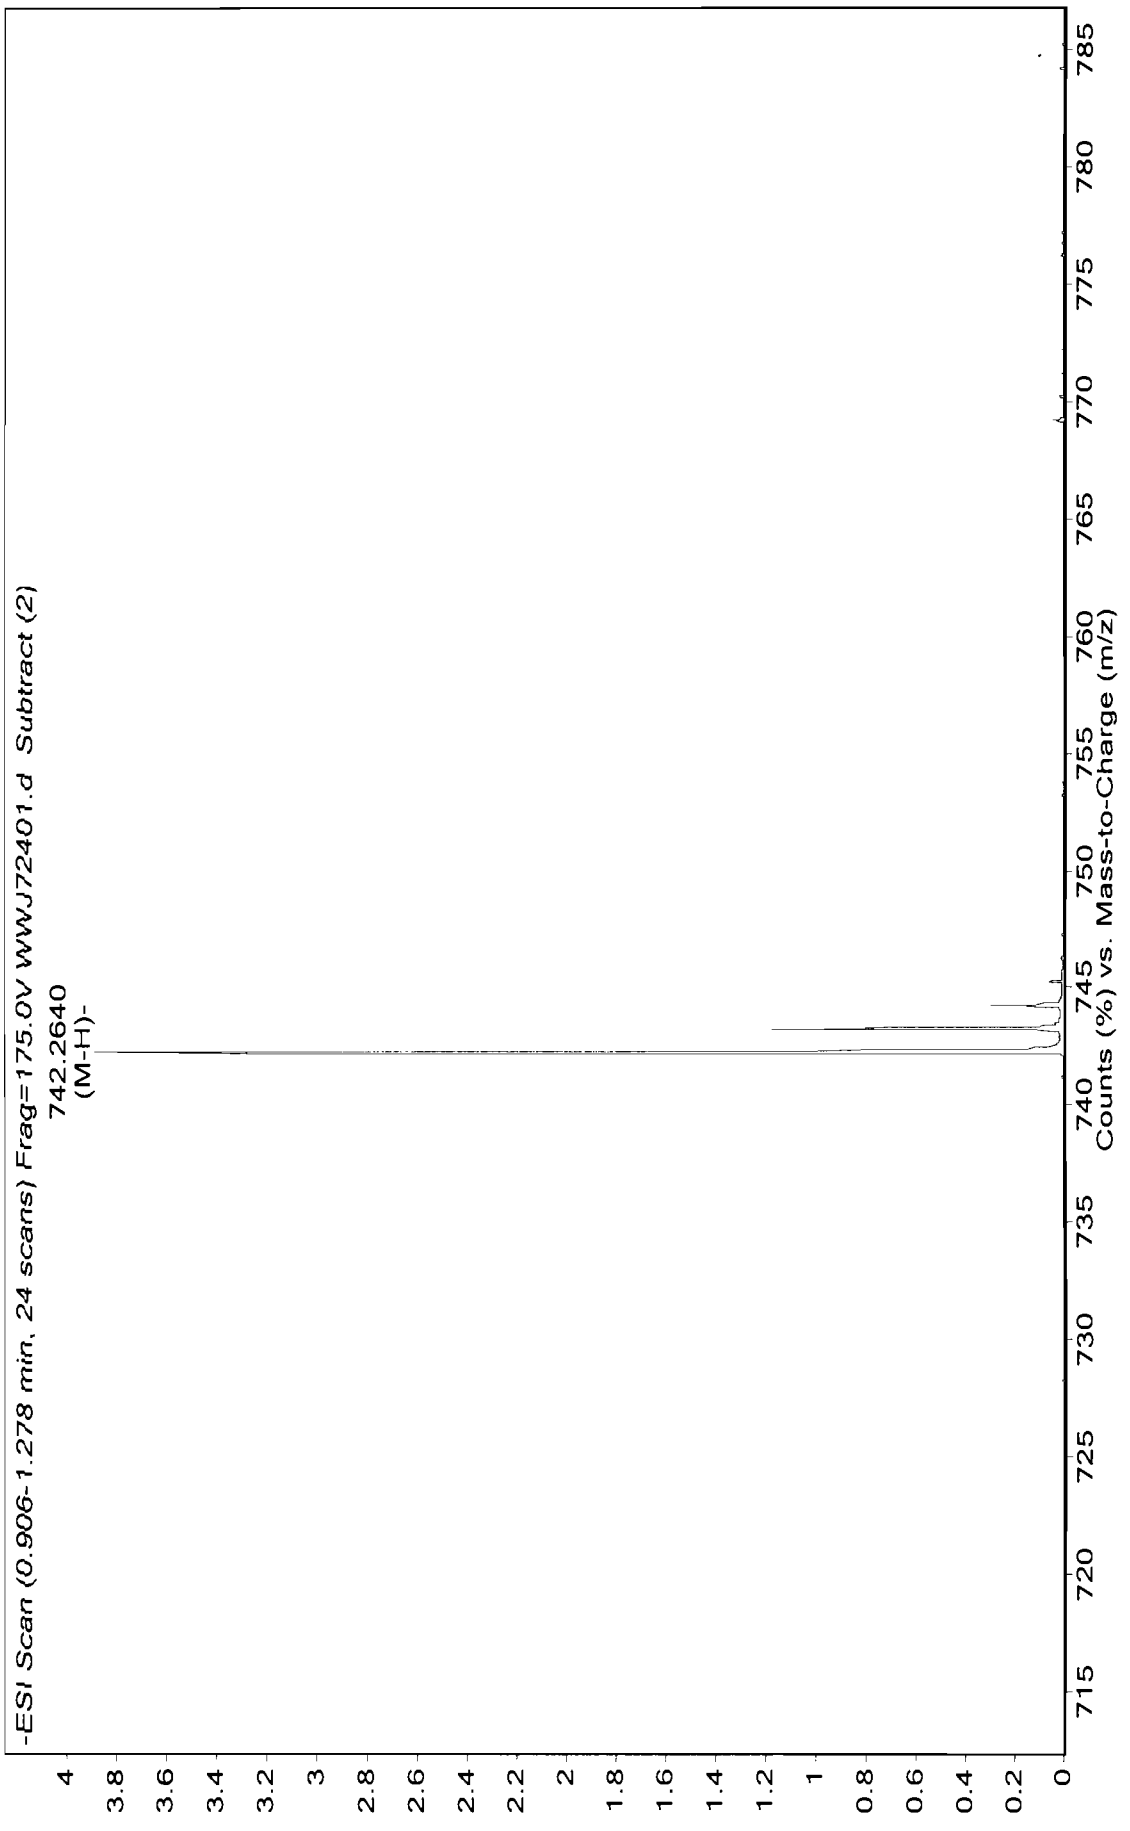

S8-c

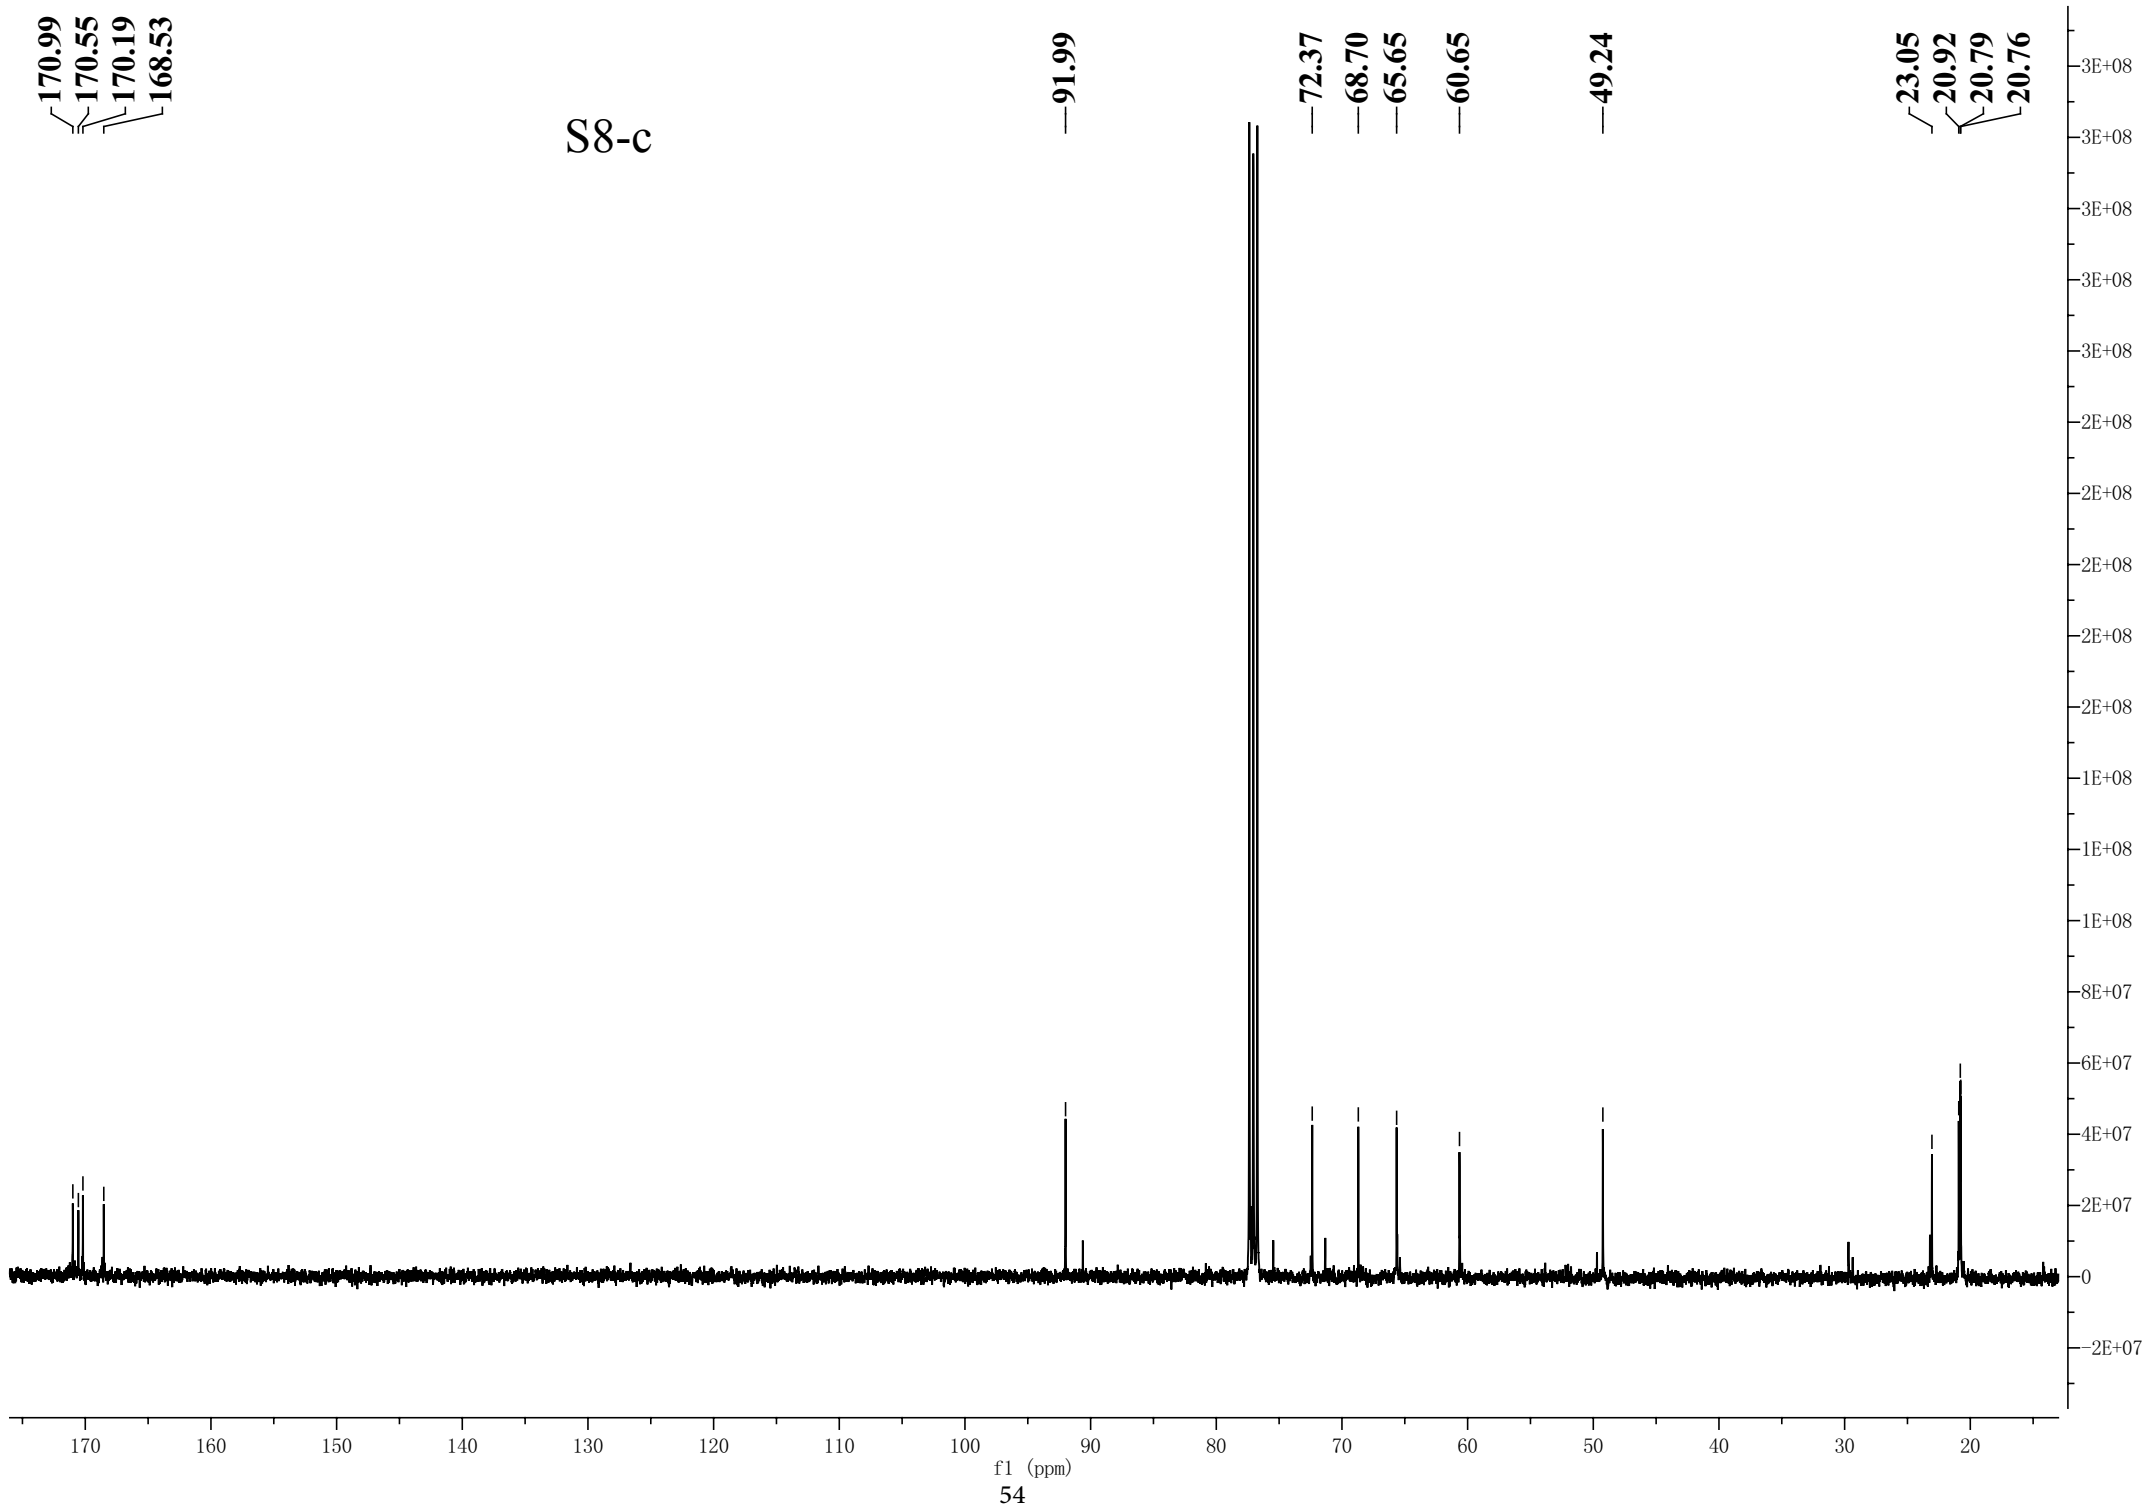

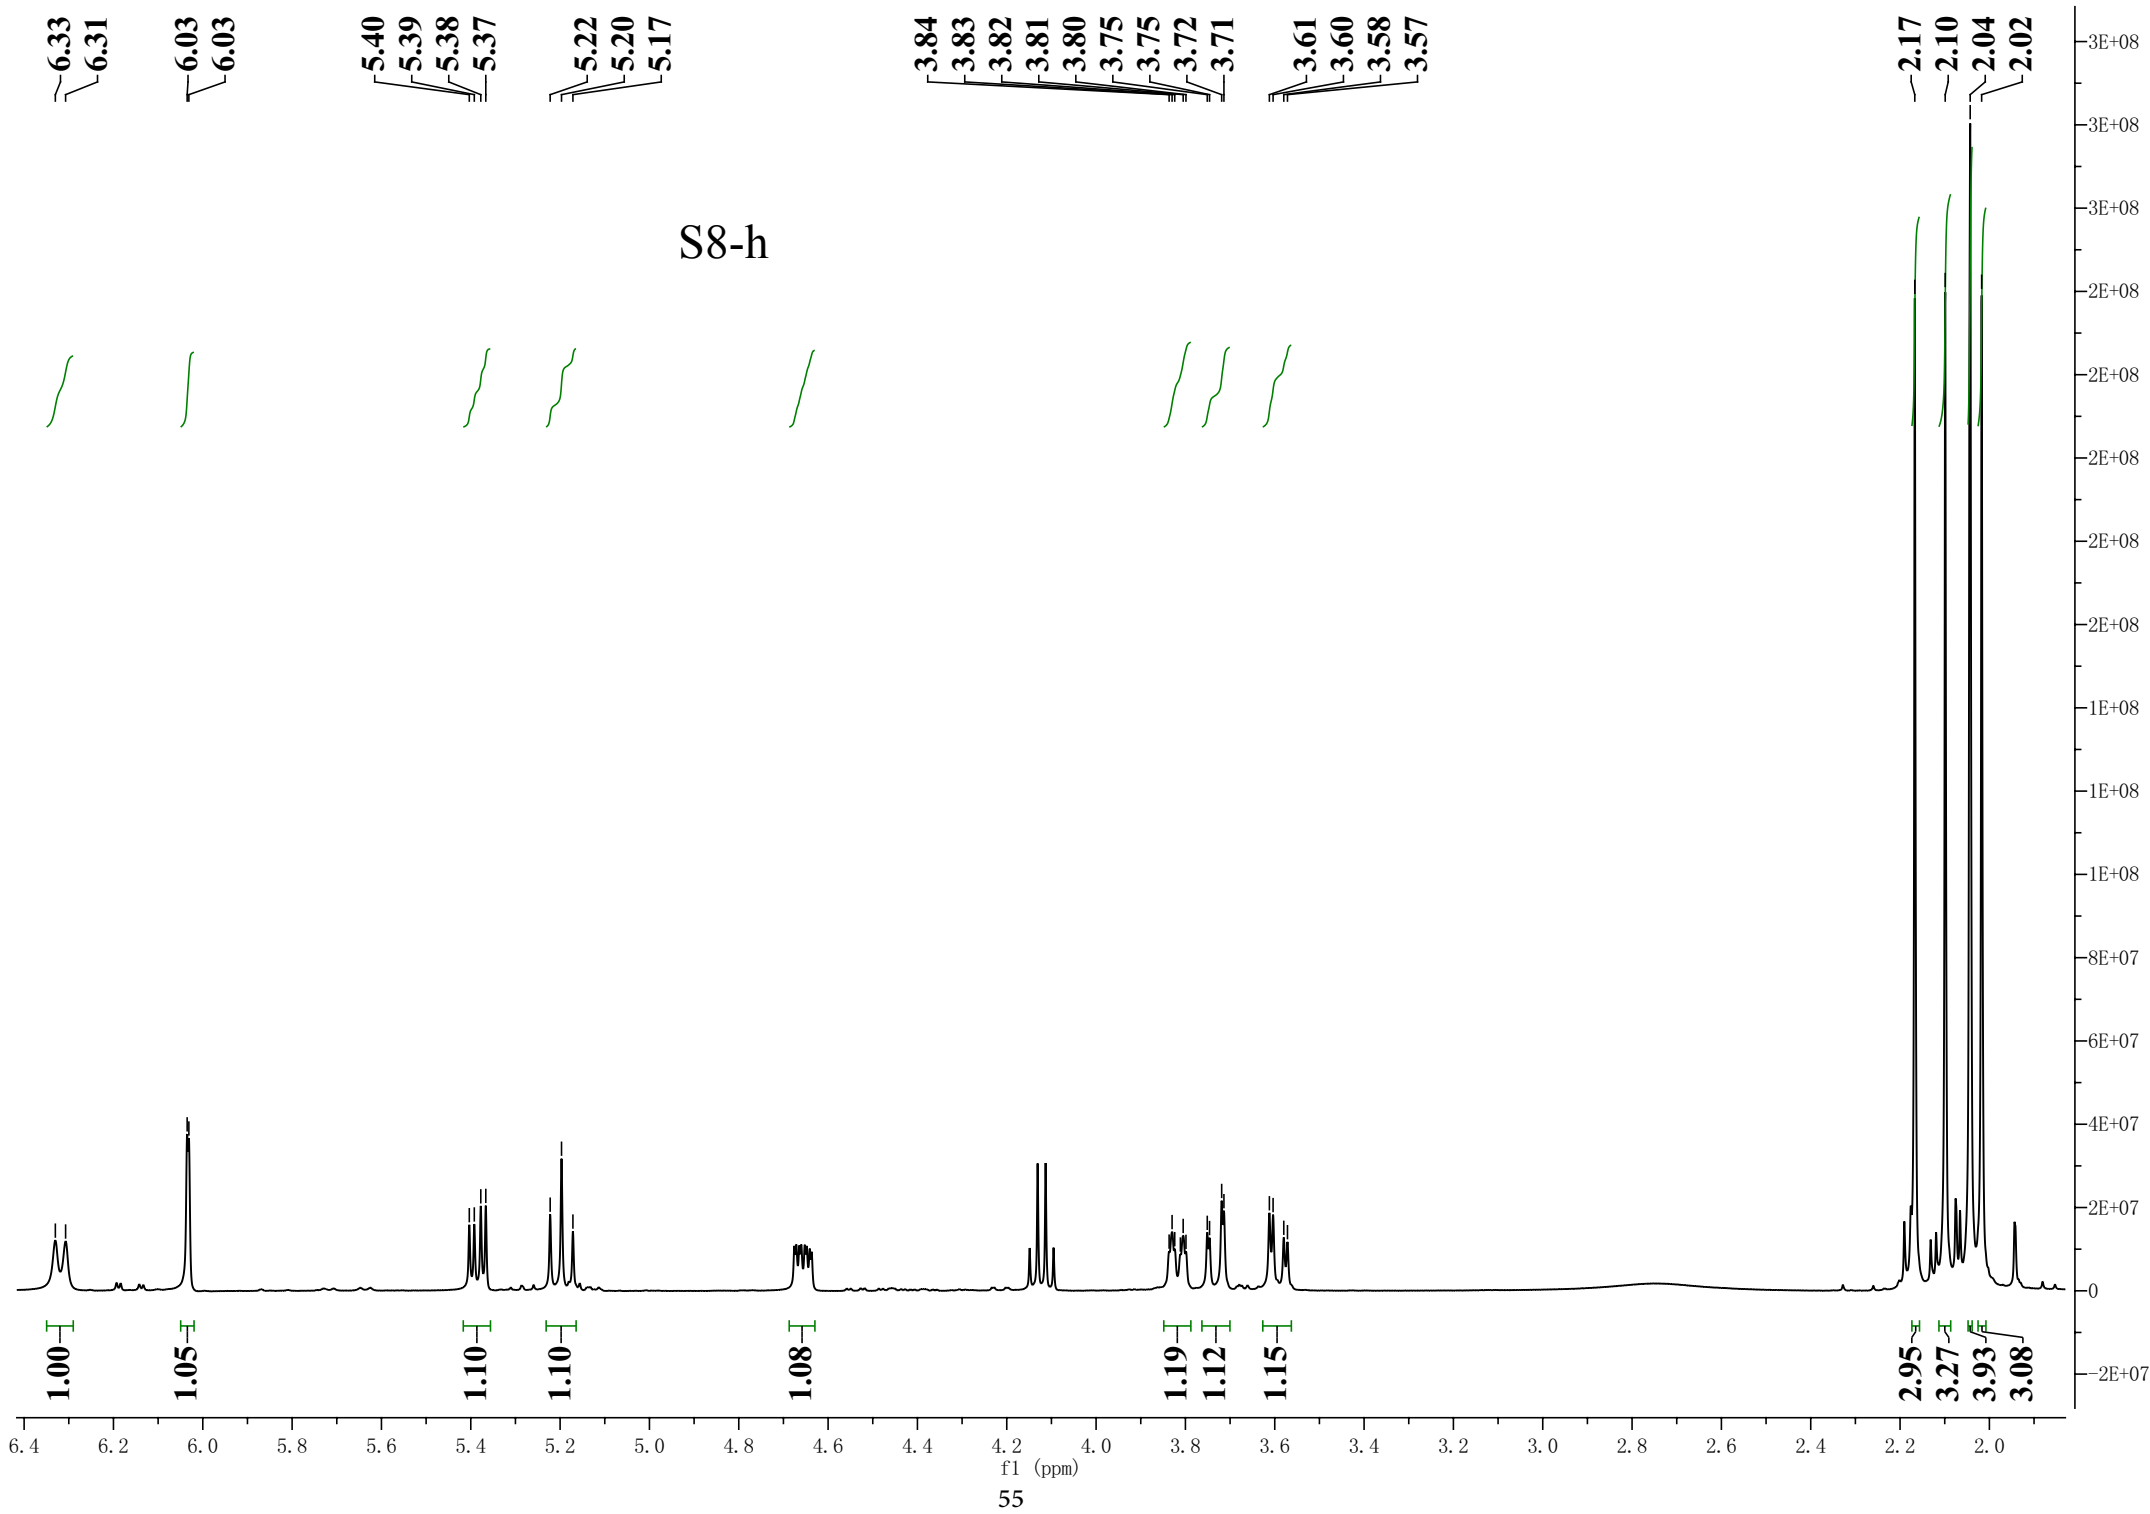



S9-c

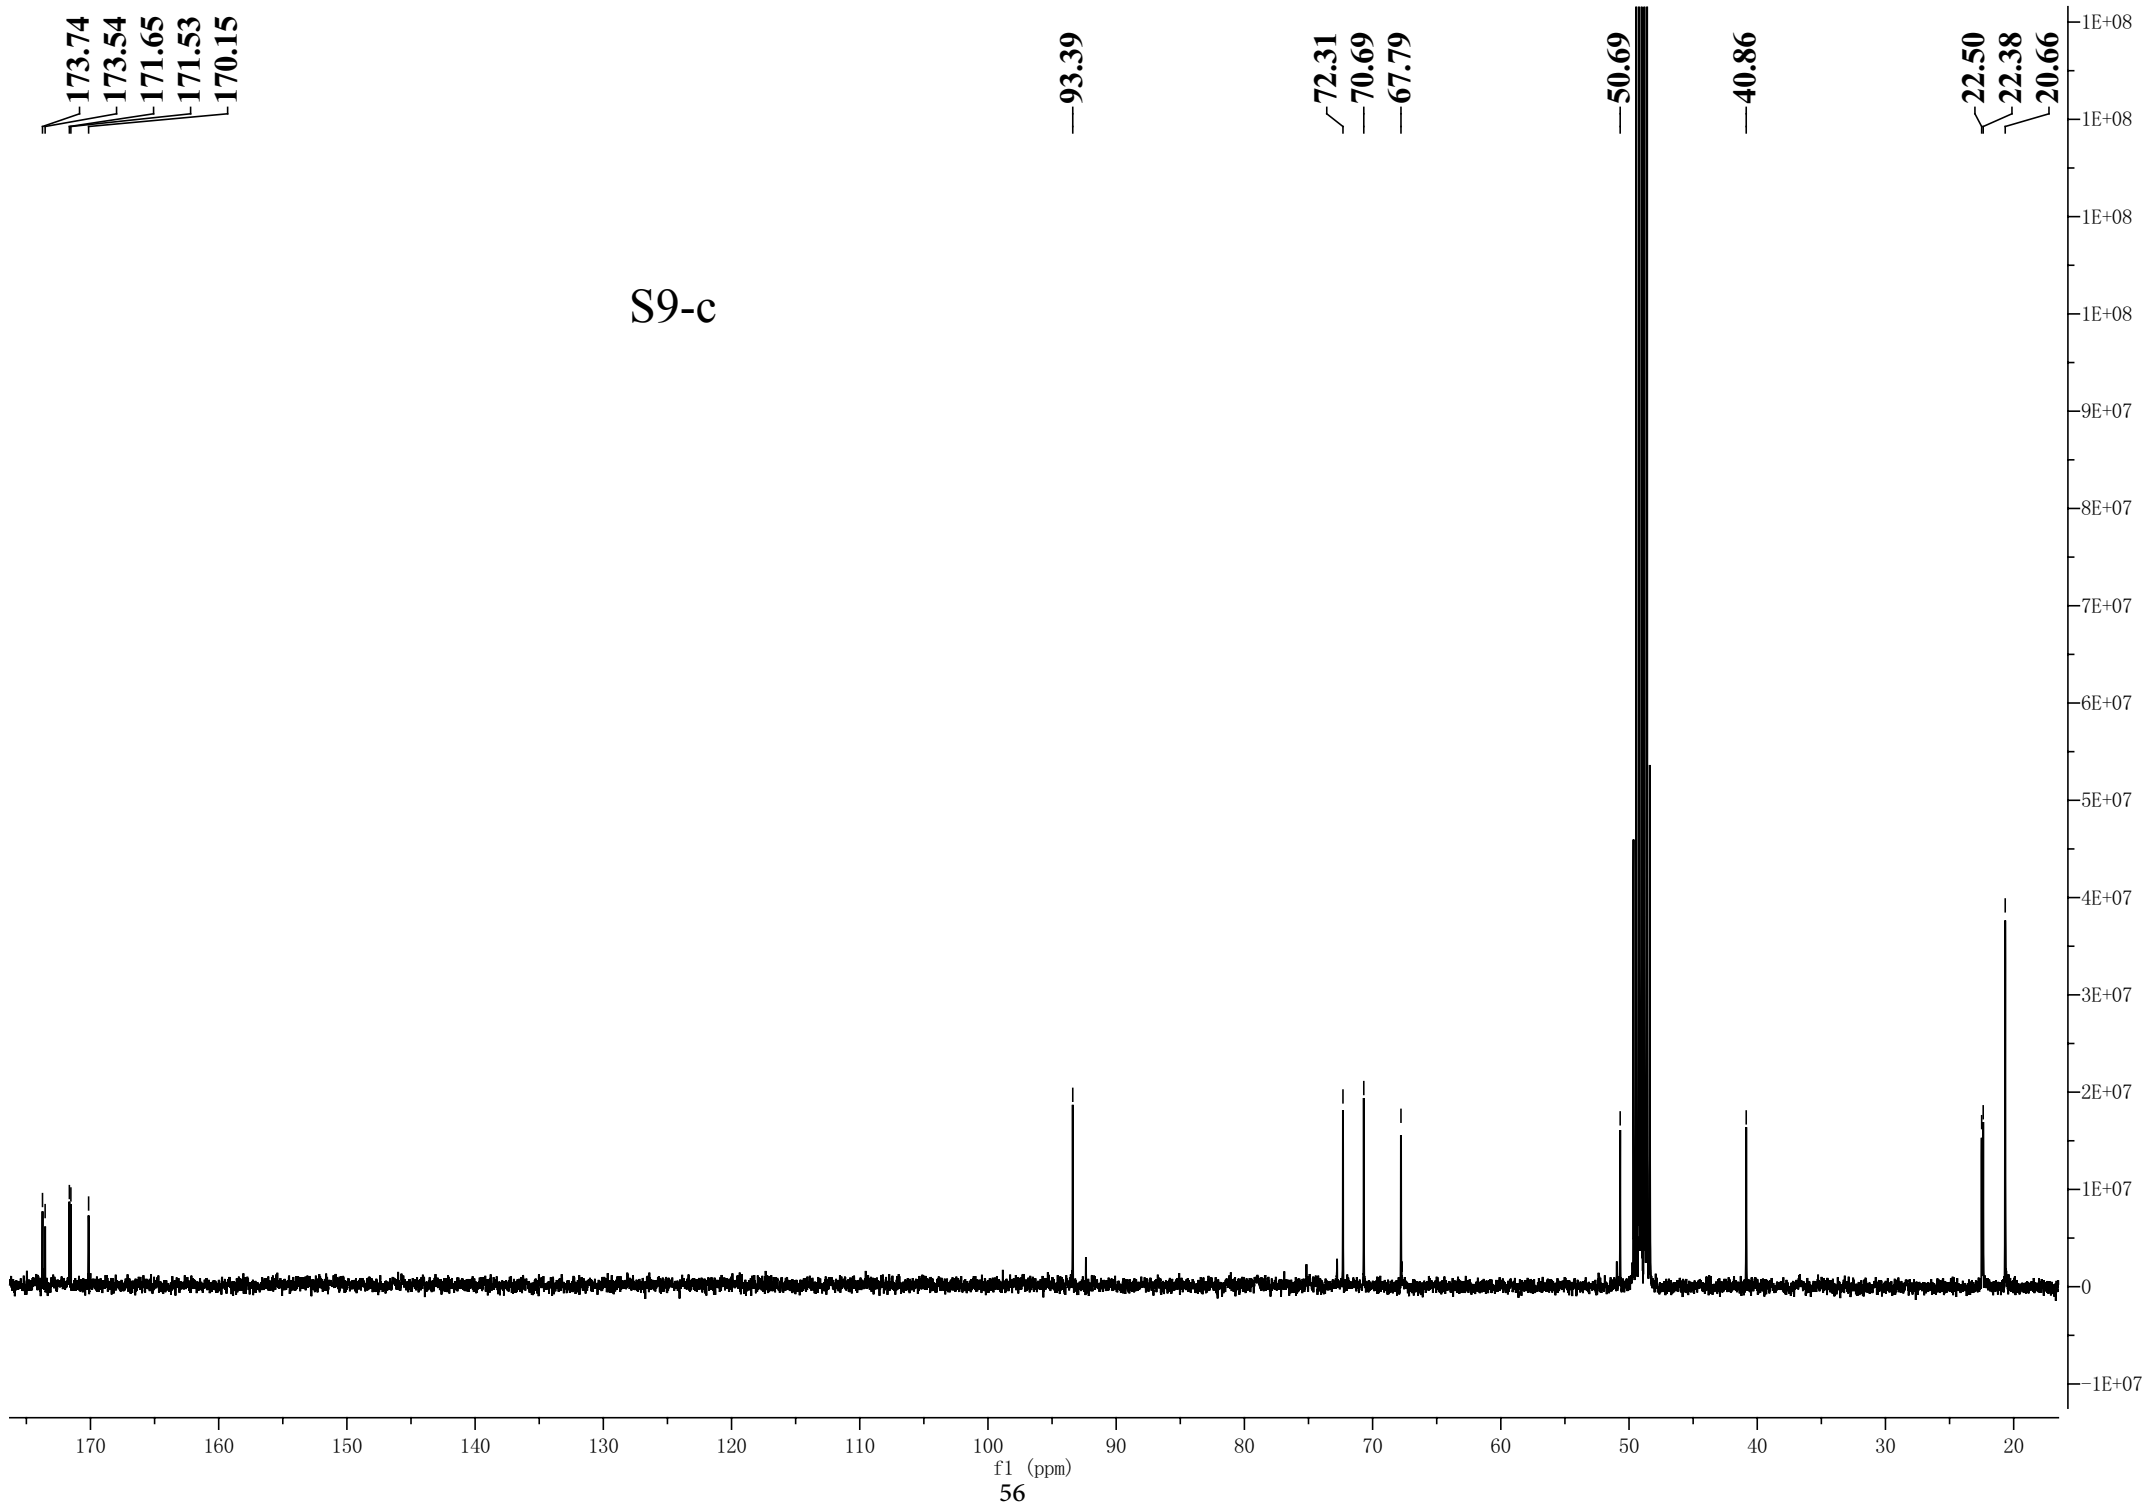

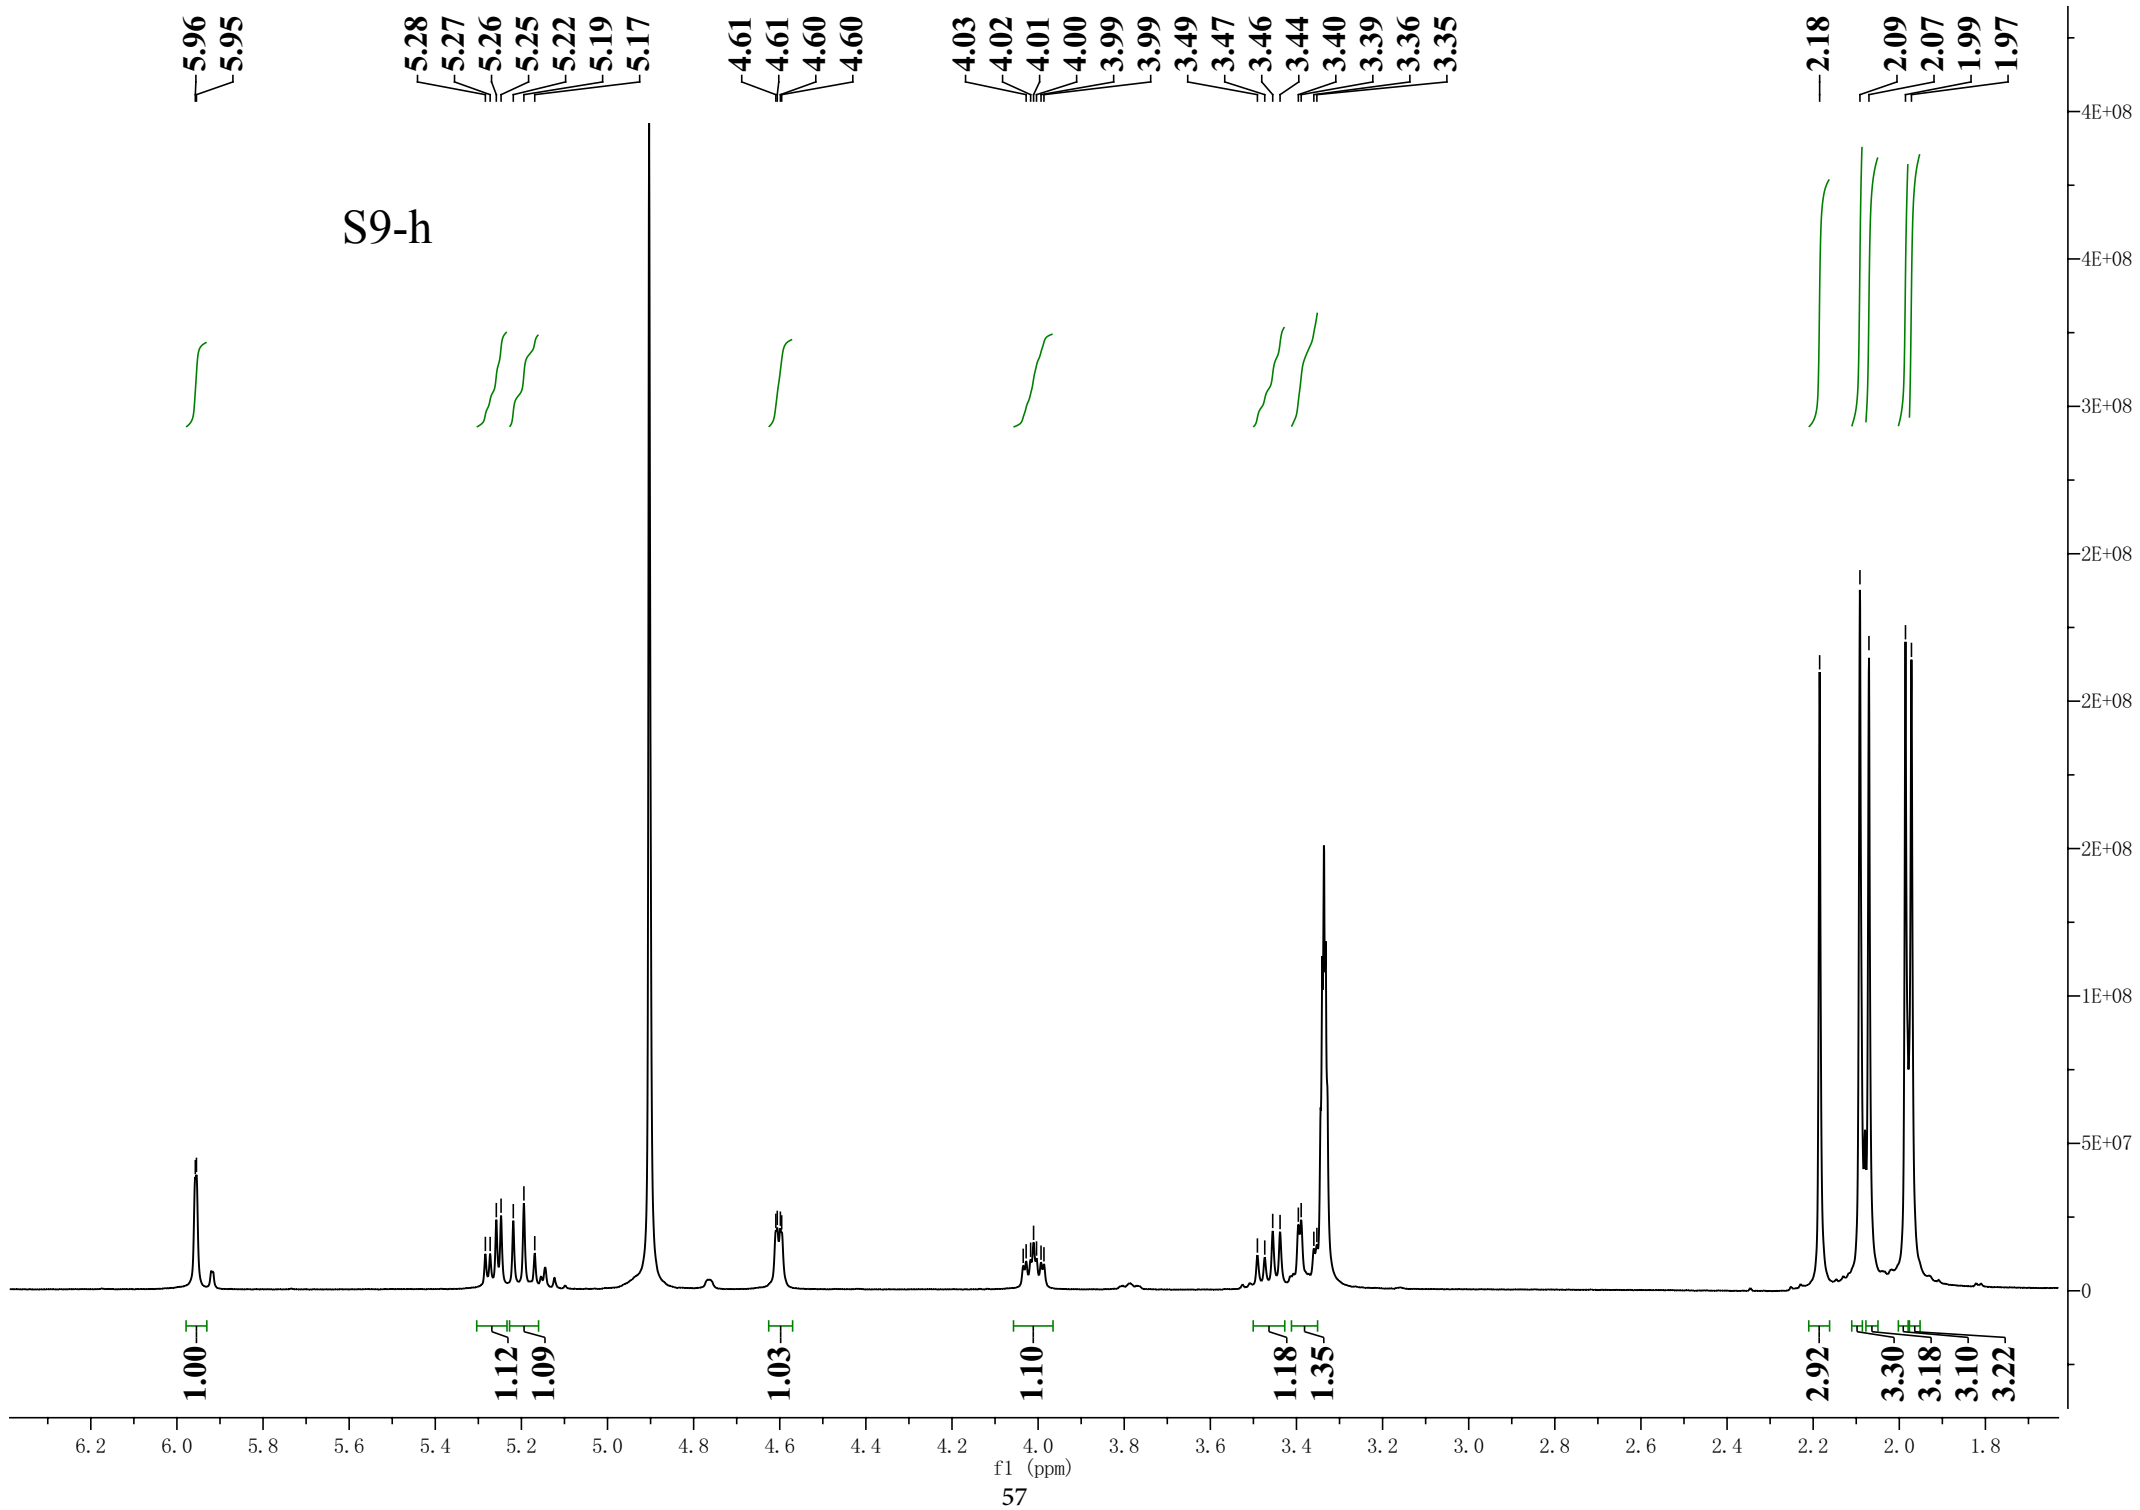

Supplement: c5ra00296f1.pdf [file c5ra00296f1.pdf]
